# Supplementary material for: OH-initiated oxidation of vinyl butyrate: ab initio insights
Source: Royal Society of Chemistry journal article supplement (doi:10.1039/d3cp01545a), 2023-01-01
Supplement: d3cp01545a1.pdf [file d3cp01545a1.pdf]

*Supplementary Information*

**OH-initiated Oxidation of Vinyl Butyrate in the Atmosphere: *Ab initio* Insights**

Loc T. Nguyen<sup>a</sup>, Uyen N.-P. Tran<sup>a</sup>, Tam V.-T. Mai<sup>b</sup>, Trang T. Nguyen<sup>a</sup> and Lam K. Huynh<sup>a,\*</sup>

<sup>a</sup> Chemical Engineering Department, International University -VNUHCM, Ho Chi Minh City, Vietnam.

<sup>b</sup> Faculty of Natural Sciences, Duy Tan University, Da Nang City, Vietnam.

Email: [hklam@hcmiu.edu.vn](mailto:hklam@hcmiu.edu.vn) (LKH)

## Contents

|                                                                                                                                                                                                                                                                                                                           |    |
|---------------------------------------------------------------------------------------------------------------------------------------------------------------------------------------------------------------------------------------------------------------------------------------------------------------------------|----|
| Table S1. Optimized geometries, electronic energies at 0 K ( $E_{elec0}$ K), zero-point energy (ZPE) corrections and harmonic wavenumbers of the species involved with the lowest-energy conformer of a given species, calculated at M06-2X/aug-cc-pVTZ level of theory for the VB + OH/O <sub>2</sub> /NO reactions..... | 3  |
| Table S2. Calculated total rate constants, $k_{total}(T, P)$ , of the “VB + OH → products” reaction at different pressures for the temperature range of 200 - 2000 K. Units: cm <sup>3</sup> molecule <sup>-1</sup> s <sup>-1</sup> .....                                                                                 | 37 |
| Table S3. Calculated Eckart tunneling factors via transition state channels at $P = 760$ Torr for the temperature range of 200 - 400 K. ....                                                                                                                                                                              | 38 |
| Table S4. Individual rate constants $k(T, P)$ for “VB + OH → products” reaction at $P = 760$ Torr for the temperature range of 200 - 2000 K. Units: cm <sup>3</sup> molecule <sup>-1</sup> s <sup>-1</sup> .....                                                                                                          | 39 |
| Table S5. Individual rate constants $k(T, P)$ for “P5 + O <sub>2</sub> → Products” at $P = 760$ Torr for the temperature range of 200 - 400 K. Units: cm <sup>3</sup> molecule <sup>-1</sup> s <sup>-1</sup> .....                                                                                                        | 39 |
| Table S6. Individual rate constants $k(T, P)$ for “P5 → Products” decomposition at $P = 760$ Torr for the temperature range of 200 - 400 K. Unit: s <sup>-1</sup> . ....                                                                                                                                                  | 40 |
| Table S7. Individual rate constants $k(T, P)$ for “IM7 + NO → Products” at $P = 760$ Torr for the temperature range of 200 - 400 K. Units: cm <sup>3</sup> molecule <sup>-1</sup> s <sup>-1</sup> .....                                                                                                                   | 40 |
| Table S8. Estimated branching ratios for “VB + OH → products” reactions at $P = 760$ Torr for the temperature range of 200 - 2000 K.....                                                                                                                                                                                  | 41 |
| Table S9. Estimated branching ratios for “P5 + O <sub>2</sub> → products” reactions at $P = 760$ Torr for the temperature range of 200 - 400 K.....                                                                                                                                                                       | 41 |
| Table S10. Estimated branching ratios for each species of “IM7 + NO → products” reactions at $P = 760$ Torr for the temperature range of 200 - 400 K.....                                                                                                                                                                 | 42 |
| Figure S1. Estimated total rate constants for “P5 + O <sub>2</sub> → products” reactions at $P = 760$ Torr for the temperature range of 200 - 400 K.....                                                                                                                                                                  | 43 |
| Figure S2: Branching ratios ( $\Gamma$ ) for the products formation of “P5 + O <sub>2</sub> → products” reactions at $P = 760$ Torr for the temperature range of 200 - 400 K.....                                                                                                                                         | 43 |
| Figure S3. Estimated total rate constants for the “IM7 + NO → products” reactions at $P = 760$ Torr for the temperature range of 200 - 400 K.....                                                                                                                                                                         | 44 |
| Figure S4: Branching ratios ( $\Gamma$ ) for the products formation of “IM7 + NO → products” reactions at $P = 760$ Torr for the temperature range of 200 - 400 K.....                                                                                                                                                    | 44 |
| Figure S5. Geometries for the species involved in the VB + OH/O <sub>2</sub> /NO/ reaction were optimized at M06-2X/aug-cc-pVTZ level. All structures were obtained for the lowest-energy conformer. Bond lengths and bond angles are in Å and degree (°), respectively.....                                              | 58 |
| Figure S6: Hindrance potentials for the species involved in the VB + OH/O <sub>2</sub> /NO reaction, obtained at M06-2X/cc-pVDZ level. ....                                                                                                                                                                               | 87 |

Table S1. Optimized geometries, electronic energies at 0 K ( $E_{elec}^{0K}$ ), zero-point energy (ZPE) corrections and harmonic wavenumbers of the species involved with the lowest-energy conformer of a given species, calculated at M06-2X/aug-cc-pVTZ level of theory for the VB + OH/O<sub>2</sub>/NO reactions.

| VB + OH channels                |                          |          |          |          |                              |                  |                                                         |          |          |
|---------------------------------|--------------------------|----------|----------|----------|------------------------------|------------------|---------------------------------------------------------|----------|----------|
| Species                         | Cartesian coordinate (Å) |          |          |          | $E_{elec}^{0K}$<br>(Hartree) | ZPE<br>(Hartree) | Unscaled vibrational<br>frequencies (cm <sup>-1</sup> ) |          |          |
| <b>OH</b><br>(C <sub>∞v</sub> ) | O                        | 0        | 0        | 0.108021 | -75.7338101                  | 0.008331         | 3766.188                                                |          |          |
|                                 | H                        | 0        | 0        | -0.86417 | -75.733167                   |                  |                                                         |          |          |
| <b>VB</b><br>(C <sub>i</sub> )  | C                        | -2.85273 | 0.399159 | 0.882604 | -385.0801224                 | 0.148724         | 36.2886                                                 | 76.3784  | 109.5438 |
|                                 | H                        | -3.85462 | 0.815889 | 0.791148 |                              |                  | 150.8887                                                | 161.1449 | 228.2719 |
|                                 | H                        | -2.16497 | 1.220734 | 1.07898  |                              |                  | 301.1221                                                | 354.0097 | 430.8772 |
|                                 | H                        | -2.84536 | -0.26804 | 1.74605  |                              |                  | 485.8096                                                | 577.4686 | 675.7778 |
|                                 | C                        | -2.4527  | -0.34935 | -0.38291 |                              |                  | 736.9696                                                | 801.8686 | 890.0218 |
|                                 | H                        | -3.16578 | -1.15003 | -0.58149 |                              |                  | 899.6319                                                | 912.2005 | 925.389  |
|                                 | H                        | -2.48183 | 0.326837 | -1.23745 |                              |                  | 1005.05                                                 | 1015.227 | 1073.653 |
|                                 | C                        | -1.06173 | -0.95751 | -0.28334 |                              |                  | 1107.042                                                | 1131.319 | 1186.861 |
|                                 | H                        | -0.94844 | -1.56312 | 0.617644 |                              |                  | 1225.378                                                | 1256.381 | 1304.413 |
|                                 | H                        | -0.85358 | -1.62417 | -1.12392 |                              |                  | 1332.539                                                | 1377.418 | 1407.154 |
|                                 | C                        | 0.030665 | 0.077269 | -0.28819 |                              |                  | 1416.483                                                | 1430.026 | 1460.017 |
|                                 | C                        | 2.341612 | 0.313151 | 0.051603 |                              |                  | 1489.006                                                | 1503.554 | 1512.334 |
|                                 | H                        | 2.161328 | 1.343339 | -0.21658 |                              |                  | 1742.995                                                | 1860.283 | 3062.113 |
|                                 | C                        | 3.516225 | -0.19649 | 0.367271 |                              |                  | 3068.553                                                | 3078.172 | 3105.751 |
|                                 | H                        | 4.387342 | 0.439186 | 0.36709  |                              |                  | 3115.89                                                 | 3134.265 | 3146.169 |
|                                 | H                        | 3.626711 | -1.23929 | 0.627138 |                              |                  | 3192.674                                                | 3245.568 | 3290.369 |
|                                 | O                        | 1.220767 | -0.48679 | 0.04811  |                              |                  |                                                         |          |          |
| O                               | -0.09438                 | 1.234445 | -0.56697 |          |                              |                  |                                                         |          |          |
| <b>RC</b><br>(C <sub>i</sub> )  | C                        | -1.986   | 1.125518 | -1.07263 | -460.8257283                 | 0.159519         | 29.232                                                  | 60.5821  | 73.9924  |
|                                 | H                        | -2.31994 | 1.915738 | -1.74321 |                              |                  | 90.5782                                                 | 110.6253 | 129.4668 |
|                                 | H                        | -2.86385 | 0.565183 | -0.74624 |                              |                  | 151.6967                                                | 213.5721 | 240.3276 |
|                                 | H                        | -1.35659 | 0.445451 | -1.64873 |                              |                  | 291.4179                                                | 392.8146 | 435.7274 |
|                                 | C                        | -1.23814 | 1.706025 | 0.120565 |                              |                  | 468.854                                                 | 484.0895 | 579.6702 |
|                                 | H                        | -1.88596 | 2.390577 | 0.66783  |                              |                  | 634.6388                                                | 723.1549 | 742.6561 |
|                                 | C                        | -0.76576 | 0.62498  | 1.105685 |                              |                  | 821.0054                                                | 873.2831 | 890.3657 |
|                                 | H                        | -0.28057 | 1.086364 | 1.964388 |                              |                  | 924.962                                                 | 933.3617 | 1007.214 |
|                                 | H                        | -1.61237 | 0.027359 | 1.440013 |                              |                  | 1012.217                                                | 1072.602 | 1104.839 |
|                                 | C                        | 0.211873 | -0.29671 | 0.441778 |                              |                  | 1116.066                                                | 1186.492 | 1231.019 |
|                                 | C                        | 2.439983 | -0.43364 | -0.28566 |                              |                  | 1284.097                                                | 1312.077 | 1332.141 |
|                                 | H                        | 2.142884 | -1.39328 | -0.68004 |                              |                  | 1361.676                                                | 1387.517 | 1423.303 |
|                                 | C                        | 3.64556  | 0.090994 | -0.37433 |                              |                  | 1426.983                                                | 1486.75  | 1496.175 |
|                                 | H                        | 4.42591  | -0.45658 | -0.87843 |                              |                  | 1505.235                                                | 1509.483 | 1743.56  |
|                                 | H                        | 3.871077 | 1.059682 | 0.047467 |                              |                  | 1821.214                                                | 3056.842 | 3075.252 |
|                                 | O                        | 1.435678 | 0.26302  | 0.35727  |                              |                  | 3092.877                                                | 3107.436 | 3128.848 |
|                                 | O                        | -0.03897 | -1.38695 | -0.0076  |                              |                  | 3138.399                                                | 3152.666 | 3193.628 |
| H                               | -0.37549                 | 2.284461 | -0.21317 | 3250.177 | 3292.081                     | 3585.838         |                                                         |          |          |
| O                               | -2.86037                 | -1.75336 | -0.06659 |          |                              |                  |                                                         |          |          |
| H                               | -1.88091                 | -1.80964 | -0.08706 |          |                              |                  |                                                         |          |          |
| <b>IM1</b><br>(C <sub>i</sub> ) | C                        | 2.812068 | -1.06813 | 0.768458 | -460.8688901                 | 0.162404         | 39.3653                                                 | 53.0892  | 126.5498 |
|                                 | H                        | 3.598134 | -1.80227 | 0.599189 |                              |                  | 140.9157                                                | 156.4947 | 192.3911 |
|                                 | H                        | 1.868748 | -1.60521 | 0.861798 |                              |                  | 237.4464                                                | 268.7202 | 310.2757 |

|                   |   |          |          |          |              |          |          |          |          |
|-------------------|---|----------|----------|----------|--------------|----------|----------|----------|----------|
|                   | H | 3.018145 | -0.57002 | 1.717172 |              |          | 323.5811 | 390.7999 | 477.5769 |
|                   | C | 2.750372 | -0.05848 | -0.37112 |              |          | 526.8667 | 553.5868 | 591.8229 |
|                   | H | 3.710402 | 0.448782 | -0.46988 |              |          | 681.6187 | 797.1952 | 868.5819 |
|                   | H | 2.56062  | -0.57332 | -1.31295 |              |          | 891.1548 | 904.2976 | 931.1396 |
|                   | C | 1.671946 | 0.993451 | -0.15771 |              |          | 1067.458 | 1069.878 | 1092.012 |
|                   | H | 1.763217 | 1.474085 | 0.817675 |              |          | 1104.772 | 1122.908 | 1171.342 |
|                   | H | 1.742339 | 1.794264 | -0.89826 |              |          | 1239.209 | 1252.152 | 1276.259 |
|                   | C | 0.279806 | 0.436544 | -0.2767  |              |          | 1303.624 | 1353.483 | 1378.504 |
|                   | C | -1.97359 | 0.992633 | 0.189434 |              |          | 1399.586 | 1414.353 | 1420.554 |
|                   | H | -2.59504 | 1.868028 | 0.104895 |              |          | 1440.824 | 1459.733 | 1489.179 |
|                   | C | -2.46541 | -0.33697 | 0.6403   |              |          | 1493.166 | 1504.723 | 1512.327 |
|                   | H | -1.75241 | -0.76598 | 1.353494 |              |          | 1831.872 | 3028.694 | 3062.548 |
|                   | H | -3.41213 | -0.19157 | 1.159474 |              |          | 3068.734 | 3080.017 | 3107.207 |
|                   | O | -0.63581 | 1.317439 | 0.182321 |              |          | 3115.531 | 3117.231 | 3135.576 |
|                   | O | -0.00946 | -0.63098 | -0.74708 |              |          | 3144.453 | 3257.115 | 3817.532 |
|                   | O | -2.73589 | -1.24517 | -0.41075 |              |          |          |          |          |
|                   | H | -1.90386 | -1.36144 | -0.88458 |              |          |          |          |          |
| <b>IM2</b>        | C | 3.028381 | 0.977831 | -0.12701 | -460.8756449 | 0.161772 | 37.3001  | 68.2132  | 126.8013 |
| (C <sub>i</sub> ) | H | 3.918571 | 1.337312 | 0.387008 |              |          | 133.6951 | 145.0452 | 166.8226 |
|                   | H | 2.212162 | 1.663498 | 0.09747  |              |          | 237.3735 | 302.7773 | 312.9913 |
|                   | H | 3.222055 | 1.017349 | -1.20007 |              |          | 398.0705 | 423.4654 | 444.1464 |
|                   | C | 2.677925 | -0.43982 | 0.308046 |              |          | 502.5049 | 558.6421 | 595.6921 |
|                   | H | 3.513792 | -1.10868 | 0.100346 |              |          | 623.2526 | 715.8372 | 810.1825 |
|                   | H | 2.505337 | -0.46467 | 1.384056 |              |          | 869.9113 | 893.4093 | 910.3352 |
|                   | C | 1.443473 | -0.97592 | -0.40153 |              |          | 938.2991 | 979.8296 | 1070.211 |
|                   | H | 1.525301 | -0.87869 | -1.48519 |              |          | 1097.99  | 1107.294 | 1134.533 |
|                   | H | 1.298941 | -2.04074 | -0.20176 |              |          | 1178.09  | 1229.231 | 1255.707 |
|                   | C | 0.171369 | -0.29422 | 0.032209 |              |          | 1303.539 | 1307.13  | 1370.827 |
|                   | C | -2.13912 | -0.01581 | -0.45125 |              |          | 1382.359 | 1413.38  | 1426.06  |
|                   | H | -2.73961 | -0.26093 | -1.32953 |              |          | 1440.425 | 1458.373 | 1460.798 |
|                   | C | -2.65983 | -0.67752 | 0.771951 |              |          | 1488.043 | 1503.19  | 1511.413 |
|                   | H | -3.35625 | -0.14386 | 1.397619 |              |          | 1816.554 | 3062.24  | 3067.915 |
|                   | H | -2.48406 | -1.72939 | 0.930466 |              |          | 3076.036 | 3077.806 | 3106.649 |
|                   | O | -0.84149 | -0.56433 | -0.80145 |              |          | 3116.825 | 3134.256 | 3143.925 |
|                   | O | 0.058108 | 0.395805 | 1.015112 |              |          | 3188.933 | 3304.647 | 3806.781 |
|                   | O | -2.11055 | 1.364431 | -0.37443 |              |          |          |          |          |
|                   | H | -1.59796 | 1.594243 | 0.411274 |              |          |          |          |          |
| <b>IM3</b>        | C | 3.414413 | 0.434565 | 0.67523  | -460.8785877 | 0.163228 | 39.1165  | 59.9726  | 66.4065  |
| (C <sub>i</sub> ) | H | 4.250092 | 1.119569 | 0.540646 |              |          | 113.7135 | 152.7559 | 205.2615 |
|                   | H | 3.795503 | -0.49414 | 1.09857  |              |          | 246.3689 | 315.0837 | 336.5108 |
|                   | H | 2.714766 | 0.876906 | 1.382524 |              |          | 364.8673 | 456.1023 | 507.2791 |
|                   | C | 2.712113 | 0.17928  | -0.66974 |              |          | 563.0461 | 582.0094 | 678.8482 |
|                   | H | 2.341865 | 1.129889 | -1.05497 |              |          | 769.0045 | 792.7644 | 838.2637 |
|                   | H | 3.425648 | -0.22847 | -1.38503 |              |          | 905.521  | 959.0077 | 977.343  |
|                   | C | 1.573229 | -0.75318 | -0.50902 |              |          | 1040.092 | 1072.854 | 1092.933 |
|                   | H | 1.683493 | -1.81833 | -0.64867 |              |          | 1110.448 | 1152.915 | 1163.209 |
|                   | C | 0.28949  | -0.26001 | -0.06242 |              |          | 1242.346 | 1253.045 | 1299.527 |
|                   | C | -1.90973 | -0.87385 | 0.595987 |              |          | 1315.085 | 1331.841 | 1388.838 |
|                   | H | -2.3876  | -1.83457 | 0.769    |              |          | 1399.185 | 1407.335 | 1459.475 |
|                   | C | -2.75393 | -0.01816 | -0.34244 |              |          | 1466.352 | 1483.576 | 1495.509 |

|                                 |   |          |          |          |              |          |          |          |          |
|---------------------------------|---|----------|----------|----------|--------------|----------|----------|----------|----------|
|                                 | H | -2.47393 | -0.25824 | -1.37538 |              |          | 1501.76  | 1505.586 | 1510.765 |
|                                 | H | -3.79942 | -0.29862 | -0.2127  |              |          | 1736.132 | 3022.139 | 3067.283 |
|                                 | O | -0.62206 | -1.23409 | 0.068773 |              |          | 3076.176 | 3086.333 | 3105.855 |
|                                 | O | 0.057321 | 0.913102 | 0.17072  |              |          | 3120.501 | 3143.157 | 3150.51  |
|                                 | O | -2.68248 | 1.360903 | -0.08681 |              |          | 3155.557 | 3226.262 | 3782.216 |
|                                 | H | -1.74743 | 1.589167 | -0.00743 |              |          |          |          |          |
|                                 | H | -1.77878 | -0.35445 | 1.546411 |              |          |          |          |          |
| <b>IM4</b><br>(C <sub>i</sub> ) | C | -2.34075 | 1.38206  | 0.045752 | -460.8689577 | 0.164254 | 25.7781  | 56.5588  | 69.7808  |
|                                 | H | -2.82573 | 1.122041 | 0.988572 |              |          | 126.9546 | 149.5895 | 157.4137 |
|                                 | H | -2.94295 | 2.132831 | -0.46401 |              |          | 215.37   | 274.7315 | 357.9449 |
|                                 | H | -1.38181 | 1.851924 | 0.300617 |              |          | 363.3583 | 404.1716 | 419.8842 |
|                                 | C | -2.1401  | 0.179598 | -0.80206 |              |          | 459.4521 | 551.2772 | 643.8233 |
|                                 | H | -2.00563 | 0.296726 | -1.86752 |              |          | 784.7148 | 850.5614 | 898.1362 |
|                                 | C | -1.69966 | -1.10706 | -0.17747 |              |          | 908.4153 | 925.4946 | 937.2554 |
|                                 | H | -2.33653 | -1.36577 | 0.669173 |              |          | 1002.445 | 1076.107 | 1107.684 |
|                                 | H | -1.69335 | -1.91673 | -0.90355 |              |          | 1115.766 | 1152.226 | 1157.983 |
|                                 | C | -0.30512 | -0.90428 | 0.368398 |              |          | 1219.028 | 1258.911 | 1283.426 |
|                                 | C | 1.971101 | -0.72307 | -0.23673 |              |          | 1307.054 | 1322.051 | 1372.697 |
|                                 | H | 2.151503 | -1.0075  | 0.799655 |              |          | 1383.002 | 1414.627 | 1423.258 |
|                                 | C | 2.241836 | 0.751054 | -0.45467 |              |          | 1452.442 | 1467.492 | 1476.119 |
|                                 | H | 3.289565 | 0.941417 | -0.1952  |              |          | 1489.15  | 1497.784 | 1513.638 |
|                                 | H | 2.10499  | 0.997036 | -1.50821 |              |          | 1814.039 | 3005.404 | 3029.152 |
|                                 | O | 0.623486 | -1.05226 | -0.58772 |              |          | 3078.951 | 3082.165 | 3092.047 |
|                                 | O | -0.0555  | -0.58239 | 1.502694 |              |          | 3105.598 | 3132.52  | 3149.449 |
|                                 | O | 1.372736 | 1.589032 | 0.273003 |              |          | 3151.502 | 3208.529 | 3823.751 |
|                                 | H | 1.146517 | 1.163101 | 1.107406 |              |          |          |          |          |
|                                 | H | 2.603752 | -1.31999 | -0.89016 |              |          |          |          |          |
| <b>IM5</b><br>(C <sub>i</sub> ) | C | -2.31817 | 1.245445 | 0.506848 | -460.8785299 | 0.162311 | 40.2014  | 69.3242  | 119.3023 |
|                                 | H | -2.50631 | 2.28599  | 0.292849 |              |          | 143.3697 | 155.6159 | 201.5985 |
|                                 | H | -2.22622 | 0.948124 | 1.541906 |              |          | 235.0965 | 259.3243 | 350.7174 |
|                                 | C | -2.43523 | 0.216862 | -0.56056 |              |          | 391.6846 | 460.6847 | 479.0282 |
|                                 | H | -3.48707 | -0.03174 | -0.74868 |              |          | 491.2743 | 518.6942 | 557.323  |
|                                 | H | -2.04377 | 0.607348 | -1.50104 |              |          | 677.4673 | 710.9544 | 837.9143 |
|                                 | C | -1.69538 | -1.07638 | -0.19921 |              |          | 881.9514 | 901.9372 | 916.2512 |
|                                 | H | -2.15017 | -1.56018 | 0.662506 |              |          | 934.8395 | 979.5083 | 1090.118 |
|                                 | H | -1.71011 | -1.7681  | -1.04166 |              |          | 1095.569 | 1100.316 | 1117.078 |
|                                 | C | -0.26486 | -0.77856 | 0.162164 |              |          | 1185.609 | 1198.744 | 1231.748 |
|                                 | C | 1.707035 | 0.344585 | -0.58262 |              |          | 1301.88  | 1348.255 | 1363.482 |
|                                 | H | 2.051547 | 0.635889 | -1.5715  |              |          | 1376.42  | 1407.533 | 1424.312 |
|                                 | C | 1.602465 | 1.548847 | 0.331488 |              |          | 1462.383 | 1468.805 | 1471.536 |
|                                 | H | 1.256536 | 1.253647 | 1.320178 |              |          | 1483.418 | 1493.238 | 1500.471 |
|                                 | H | 2.585054 | 2.008255 | 0.42012  |              |          | 1815.172 | 3008.464 | 3077.79  |
|                                 | O | 0.381732 | -0.18451 | -0.84417 |              |          | 3089.675 | 3093.577 | 3135.494 |
|                                 | O | 0.233235 | -1.0205  | 1.235212 |              |          | 3150.634 | 3154.638 | 3166.748 |
|                                 | O | 2.571576 | -0.63635 | -0.13683 |              |          | 3168.608 | 3271.91  | 3800.129 |
|                                 | H | 2.258373 | -0.92664 | 0.729462 |              |          |          |          |          |
|                                 | H | 0.904633 | 2.273484 | -0.08649 |              |          |          |          |          |
| <b>IM6</b><br>(C <sub>i</sub> ) | C | -3.45876 | -0.18    | 0.783317 | -460.8957507 | 0.163687 | 42.6206  | 60.5172  | 108.4645 |
|                                 | H | -4.4446  | 0.282519 | 0.790263 |              |          | 145.1497 | 152.5578 | 226.0217 |
|                                 | H | -2.84577 | 0.29987  | 1.544511 |              |          | 234.888  | 301.0748 | 320.9513 |

|                                 |   |          |          |          |              |          |          |          |          |
|---------------------------------|---|----------|----------|----------|--------------|----------|----------|----------|----------|
|                                 | H | -3.57101 | -1.23262 | 1.041094 |              |          | 368.2025 | 430.6084 | 482.7908 |
|                                 | C | -2.80232 | -0.01833 | -0.59854 |              |          | 547.3417 | 561.0117 | 633.3259 |
|                                 | H | -3.43802 | -0.46575 | -1.36193 |              |          | 695.259  | 774.7266 | 812.0934 |
|                                 | H | -2.70183 | 1.046022 | -0.81354 |              |          | 875.3116 | 915.4547 | 947.6272 |
|                                 | C | -1.46092 | -0.64504 | -0.63032 |              |          | 988.1021 | 1047.258 | 1082.022 |
|                                 | H | -1.31388 | -1.66338 | -0.95856 |              |          | 1102.606 | 1128.446 | 1153.734 |
|                                 | C | -0.31295 | 0.073876 | -0.12621 |              |          | 1190.866 | 1241.855 | 1300.069 |
|                                 | C | 1.993184 | 0.018797 | 0.341456 |              |          | 1307.855 | 1331.238 | 1394.284 |
|                                 | H | 1.750335 | 0.303603 | 1.368049 |              |          | 1400.121 | 1407.368 | 1468.203 |
|                                 | C | 3.120078 | -0.97356 | 0.271654 |              |          | 1479.606 | 1484.976 | 1491.556 |
|                                 | H | 4.016986 | -0.52884 | 0.696467 |              |          | 1496.405 | 1501.638 | 1510.528 |
|                                 | H | 2.864674 | -1.875   | 0.823892 |              |          | 1729.898 | 3067.051 | 3073.207 |
|                                 | O | 0.824693 | -0.64158 | -0.18675 |              |          | 3077.023 | 3084.66  | 3120.997 |
|                                 | O | -0.35729 | 1.211085 | 0.309725 |              |          | 3142.502 | 3150.856 | 3166.481 |
|                                 | O | 2.317161 | 1.132539 | -0.41596 |              |          | 3170.326 | 3226.969 | 3820.473 |
|                                 | H | 1.628235 | 1.790861 | -0.26478 |              |          |          |          |          |
|                                 | H | 3.308434 | -1.2281  | -0.76976 |              |          |          |          |          |
| <b>TS1</b><br>(C <sub>i</sub> ) | C | 3.467968 | -0.67459 | 0.874976 | -460.8015086 | 0.153658 | -1519.06 | 34.1033  | 45.2401  |
|                                 | H | 4.406751 | -1.21788 | 0.779519 |              |          | 65.1751  | 82.6411  | 126.5229 |
|                                 | H | 2.679195 | -1.40106 | 1.066385 |              |          | 156.1024 | 163.559  | 207.7433 |
|                                 | H | 3.547771 | -0.01846 | 1.743138 |              |          | 227.9451 | 294.2847 | 357.5063 |
|                                 | C | 3.169926 | 0.1288   | -0.38501 |              |          | 379.7361 | 476.9208 | 547.2274 |
|                                 | H | 3.981242 | 0.831118 | -0.57814 |              |          | 583.7206 | 673.3612 | 767.9159 |
|                                 | H | 3.110999 | -0.53866 | -1.24484 |              |          | 799.7191 | 833.301  | 881.4366 |
|                                 | C | 1.870882 | 0.914032 | -0.28007 |              |          | 888.442  | 912.5154 | 976.5109 |
|                                 | H | 1.837907 | 1.524059 | 0.624379 |              |          | 988.868  | 1072.58  | 1103.709 |
|                                 | H | 1.750082 | 1.606578 | -1.11685 |              |          | 1118.813 | 1161.283 | 1178.401 |
|                                 | C | 0.653707 | 0.031008 | -0.28857 |              |          | 1206.957 | 1254.005 | 1303.083 |
|                                 | C | -1.66451 | 0.093237 | 0.067277 |              |          | 1304.034 | 1327.685 | 1377.598 |
|                                 | H | -1.62289 | -0.95711 | -0.18472 |              |          | 1405.507 | 1417.971 | 1458.143 |
|                                 | C | -2.76663 | 0.734505 | 0.384869 |              |          | 1489.921 | 1503.905 | 1512.777 |
|                                 | H | -2.89269 | 1.779097 | 0.627397 |              |          | 1727.395 | 1867.851 | 3062.31  |
|                                 | O | -0.45559 | 0.749087 | 0.054793 |              |          | 3068.418 | 3078.885 | 3106.245 |
|                                 | O | 0.618714 | -1.129   | -0.57312 |              |          | 3116.241 | 3134.648 | 3145.475 |
|                                 | H | -3.78566 | 0.044749 | 0.411899 |              |          | 3232.672 | 3244.919 | 3809.034 |
|                                 | O | -4.74339 | -0.68233 | 0.081316 |              |          |          |          |          |
|                                 | H | -4.75869 | -0.51648 | -0.87297 |              |          |          |          |          |
| <b>TS2</b><br>(C <sub>i</sub> ) | C | 2.308006 | 1.066491 | -0.78832 |              | 0.154364 | -1581.65 | 35.5162  | 50.2599  |
|                                 | H | 2.818648 | 1.403541 | -1.68868 |              |          | 89.4018  | 111.8311 | 157.77   |
|                                 | H | 2.803984 | 1.51712  | 0.072366 |              |          | 172.716  | 208.0859 | 268.1523 |
|                                 | H | 1.287312 | 1.453324 | -0.82232 |              |          | 309.1435 | 369.898  | 383.0899 |
|                                 | C | 2.321972 | -0.45388 | -0.69014 |              |          | 409.8056 | 444.8572 | 578.4935 |
|                                 | H | 1.795879 | -0.88878 | -1.53982 |              |          | 622.8632 | 695.3393 | 723.074  |
|                                 | H | 3.345859 | -0.82622 | -0.7234  |              |          | 798.3679 | 821.6381 | 872.6749 |
|                                 | C | 1.677688 | -0.95801 | 0.607637 |              |          | 892.9338 | 915.5427 | 924.4084 |
|                                 | H | 1.629847 | -2.04734 | 0.608172 |              |          | 996.3988 | 1043.364 | 1067.829 |
|                                 |   |          |          |          |              |          | 1104.202 | 1114.011 | 1181.891 |
|                                 |   |          |          |          |              |          | 1219.546 | 1283.201 | 1287.482 |
|                                 | C | -1.76754 | -0.34682 | -0.35978 |              |          | 1362.891 | 1375.363 | 1383.313 |
|                                 | C | -2.86207 | -1.02654 | -0.61048 |              |          | 1408.201 | 1427.582 | 1477.751 |

|                                 |   |          |          |          |              |          |          |          |          |
|---------------------------------|---|----------|----------|----------|--------------|----------|----------|----------|----------|
|                                 | H | -3.79376 | -0.5044  | -0.76111 |              |          | 1495.446 | 1505.82  | 1511.112 |
|                                 | H | -2.84146 | -2.10731 | -0.67192 |              |          | 1746.459 | 1858.563 | 3055.707 |
|                                 | O | -0.52166 | -0.88655 | -0.24062 |              |          | 3080.731 | 3091.045 | 3108.842 |
|                                 | O | -0.09846 | 0.34539  | 1.591911 |              |          | 3130.043 | 3141.064 | 3153.303 |
|                                 | H | -1.78793 | 0.875254 | -0.31075 |              |          | 3173.741 | 3280.562 | 3758.875 |
|                                 | O | -1.63758 | 2.11034  | -0.09016 |              |          |          |          |          |
|                                 | H | -1.23103 | 2.018183 | 0.788311 |              |          |          |          |          |
| <b>TS3</b><br>(C <sub>i</sub> ) | C | 3.287137 | 0.195895 | 0.966211 | -460.8031554 | 0.153328 | -1557.92 | 28.9266  | 50.5155  |
|                                 | H | 4.358178 | 0.000577 | 0.979682 |              |          | 73.9065  | 100.2622 | 133.5923 |
|                                 | H | 2.780119 | -0.69494 | 1.334784 |              |          | 158.7077 | 187.8886 | 227.5924 |
|                                 | H | 3.087807 | 1.015276 | 1.658602 |              |          | 262.2721 | 299.2798 | 350.4163 |
|                                 | C | 3.120078 | -0.97356 | 0.271654 |              |          | 1479.606 | 1484.976 | 1491.556 |
|                                 | H | 4.016986 | -0.52884 | 0.696467 |              |          | 1496.405 | 1501.638 | 1510.528 |
|                                 | H | 2.864674 | -1.875   | 0.823892 |              |          | 1729.898 | 3067.051 | 3073.207 |
|                                 | O | 0.824693 | -0.64158 | -0.18675 |              |          | 3077.023 | 3084.66  | 3120.997 |
|                                 | O | -0.35729 | 1.211085 | 0.309725 |              |          | 3142.502 | 3150.856 | 3166.481 |
|                                 | O | 2.317161 | 1.132539 | -0.41596 |              |          | 3170.326 | 3226.969 | 3820.473 |
|                                 | H | 1.628235 | 1.790861 | -0.26478 |              |          |          |          |          |
|                                 | H | 3.308434 | -1.2281  | -0.76976 |              |          |          |          |          |
| <b>TS1</b><br>(C <sub>i</sub> ) | C | 3.467968 | -0.67459 | 0.874976 | -460.8015086 | 0.153658 | -1519.06 | 34.1033  | 45.2401  |
|                                 | H | 4.406751 | -1.21788 | 0.779519 |              |          | 65.1751  | 82.6411  | 126.5229 |
|                                 | H | 2.679195 | -1.40106 | 1.066385 |              |          | 156.1024 | 163.559  | 207.7433 |
|                                 | H | 3.547771 | -0.01846 | 1.743138 |              |          | 227.9451 | 294.2847 | 357.5063 |
|                                 | C | 3.169926 | 0.1288   | -0.38501 |              |          | 379.7361 | 476.9208 | 547.2274 |
|                                 | H | 3.981242 | 0.831118 | -0.57814 |              |          | 583.7206 | 673.3612 | 767.9159 |
|                                 | H | 3.110999 | -0.53866 | -1.24484 |              |          | 799.7191 | 833.301  | 881.4366 |
|                                 | C | 1.870882 | 0.914032 | -0.28007 |              |          | 888.442  | 912.5154 | 976.5109 |
|                                 | H | 1.837907 | 1.524059 | 0.624379 |              |          | 988.868  | 1072.58  | 1103.709 |
|                                 | H | 1.750082 | 1.606578 | -1.11685 |              |          | 1118.813 | 1161.283 | 1178.401 |
|                                 | C | 0.653707 | 0.031008 | -0.28857 |              |          | 1206.957 | 1254.005 | 1303.083 |
|                                 | C | -1.66451 | 0.093237 | 0.067277 |              |          | 1304.034 | 1327.685 | 1377.598 |
|                                 | H | -1.62289 | -0.95711 | -0.18472 |              |          | 1405.507 | 1417.971 | 1458.143 |
|                                 | C | -2.76663 | 0.734505 | 0.384869 |              |          | 1489.921 | 1503.905 | 1512.777 |
|                                 | H | -2.89269 | 1.779097 | 0.627397 |              |          | 1727.395 | 1867.851 | 3062.31  |
|                                 | O | -0.45559 | 0.749087 | 0.054793 |              |          | 3068.418 | 3078.885 | 3106.245 |
|                                 | O | 0.618714 | -1.129   | -0.57312 |              |          | 3116.241 | 3134.648 | 3145.475 |
|                                 | H | -3.78566 | 0.044749 | 0.411899 |              |          | 3232.672 | 3244.919 | 3809.034 |
|                                 | O | -4.74339 | -0.68233 | 0.081316 |              |          |          |          |          |
|                                 | H | -4.75869 | -0.51648 | -0.87297 |              |          |          |          |          |
| <b>TS2</b><br>(C <sub>i</sub> ) | C | 2.308006 | 1.066491 | -0.78832 | -460.8056653 | 0.154364 | -1581.65 | 35.5162  | 50.2599  |
|                                 | H | 2.818648 | 1.403541 | -1.68868 |              |          | 89.4018  | 111.8311 | 157.77   |
|                                 | H | 2.803984 | 1.51712  | 0.072366 |              |          | 172.716  | 208.0859 | 268.1523 |
|                                 | H | 1.287312 | 1.453324 | -0.82232 |              |          | 309.1435 | 369.898  | 383.0899 |
|                                 | C | 2.321972 | -0.45388 | -0.69014 |              |          | 409.8056 | 444.8572 | 578.4935 |
|                                 | H | 1.795879 | -0.88878 | -1.53982 |              |          | 622.8632 | 695.3393 | 723.074  |
|                                 | H | 3.345859 | -0.82622 | -0.7234  |              |          | 798.3679 | 821.6381 | 872.6749 |
|                                 | C | 1.677688 | -0.95801 | 0.607637 |              |          | 892.9338 | 915.5427 | 924.4084 |
|                                 | H | 1.629847 | -2.04734 | 0.608172 |              |          | 996.3988 | 1043.364 | 1067.829 |
|                                 | H | 2.240505 | -0.62654 | 1.477557 |              |          | 1104.202 | 1114.011 | 1181.891 |
|                                 | C | 0.287571 | -0.41794 | 0.754839 |              |          | 1219.546 | 1283.201 | 1287.482 |

|                                 |   |          |          |          |              |          |          |          |          |
|---------------------------------|---|----------|----------|----------|--------------|----------|----------|----------|----------|
|                                 | C | -1.76754 | -0.34682 | -0.35978 |              |          | 1362.891 | 1375.363 | 1383.313 |
|                                 | C | -2.86207 | -1.02654 | -0.61048 |              |          | 1408.201 | 1427.582 | 1477.751 |
|                                 | H | -3.79376 | -0.5044  | -0.76111 |              |          | 1495.446 | 1505.82  | 1511.112 |
|                                 | H | -2.84146 | -2.10731 | -0.67192 |              |          | 1746.459 | 1858.563 | 3055.707 |
|                                 | O | -0.52166 | -0.88655 | -0.24062 |              |          | 3080.731 | 3091.045 | 3108.842 |
|                                 | O | -0.09846 | 0.34539  | 1.591911 |              |          | 3130.043 | 3141.064 | 3153.303 |
|                                 | H | -1.78793 | 0.875254 | -0.31075 |              |          | 3173.741 | 3280.562 | 3758.875 |
|                                 | O | -1.63758 | 2.11034  | -0.09016 |              |          |          |          |          |
|                                 | H | -1.23103 | 2.018183 | 0.788311 |              |          |          |          |          |
| <b>TS3</b><br>(C <sub>i</sub> ) | C | 3.287137 | 0.195895 | 0.966211 | -460.8031554 | 0.153328 | -1557.92 | 28.9266  | 50.5155  |
|                                 | H | 4.358178 | 0.000577 | 0.979682 |              |          | 73.9065  | 100.2622 | 133.5923 |
|                                 | H | 2.780119 | -0.69494 | 1.334784 |              |          | 158.7077 | 187.8886 | 227.5924 |
|                                 | H | 3.087807 | 1.015276 | 1.658602 |              |          | 262.2721 | 299.2798 | 350.4163 |
|                                 | C | 2.813135 | 0.546871 | -0.43871 |              |          | 421.6132 | 475.9012 | 574.3497 |
|                                 | H | 3.348913 | 1.42353  | -0.80337 |              |          | 653.5492 | 656.7383 | 702.0356 |
|                                 | H | 3.036032 | -0.27322 | -1.12135 |              |          | 801.4351 | 842.7931 | 844.256  |
|                                 | C | 1.32106  | 0.840624 | -0.49272 |              |          | 889.337  | 912.6698 | 933.9554 |
|                                 | H | 1.029747 | 1.583944 | 0.252013 |              |          | 947.2303 | 1004.24  | 1073.727 |
|                                 | H | 1.026311 | 1.249258 | -1.46262 |              |          | 1107.284 | 1128.883 | 1177.492 |
|                                 | C | 0.477582 | -0.38585 | -0.28061 |              |          | 1210.191 | 1254.92  | 1302.535 |
|                                 | C | -1.74924 | -1.05383 | 0.066174 |              |          | 1310.838 | 1378.094 | 1407.331 |
|                                 | H | -1.33348 | -2.05271 | 0.052307 |              |          | 1418.937 | 1459.209 | 1464.017 |
|                                 | C | -3.02049 | -0.77203 | 0.227993 |              |          | 1488.58  | 1504.139 | 1512.488 |
|                                 | H | -3.81612 | -1.48668 | 0.367497 |              |          | 1745.451 | 1869.921 | 3063.119 |
|                                 | O | -0.83129 | -0.0398  | -0.1022  |              |          | 3066.471 | 3079.475 | 3104.058 |
|                                 | O | 0.85546  | -1.5192  | -0.28426 |              |          | 3116.103 | 3135.571 | 3146.159 |
|                                 | H | -3.36022 | 0.412697 | 0.223019 |              |          | 3211.902 | 3261.34  | 3786.741 |
|                                 | O | -3.34208 | 1.660787 | 0.162319 |              |          |          |          |          |
|                                 | H | -2.38915 | 1.777848 | 0.022511 |              |          |          |          |          |
| <b>TS4</b><br>(C <sub>i</sub> ) | C | -1.49545 | 1.652188 | 1.025704 | -460.8116142 | 0.154208 | -1207.57 | 21.8869  | 67.4146  |
|                                 | H | -0.59462 | 1.362533 | 1.569789 |              |          | 77.0118  | 92.6813  | 128.6654 |
|                                 | H | -2.31035 | 1.008803 | 1.356916 |              |          | 139.4488 | 192.7094 | 227.946  |
|                                 | H | -1.73082 | 2.67917  | 1.298633 |              |          | 280.7252 | 367.5105 | 410.2383 |
|                                 | C | -1.29297 | 1.5221   | -0.47851 |              |          | 432.6711 | 462.9978 | 619.3915 |
|                                 | H | -2.17568 | 1.873166 | -1.01266 |              |          | 679.2402 | 732.1306 | 739.9109 |
|                                 | H | -0.45492 | 2.143489 | -0.80441 |              |          | 817.907  | 870.7376 | 890.1788 |
|                                 | C | -1.02136 | 0.089428 | -0.90233 |              |          | 922.8891 | 931.2291 | 938.8634 |
|                                 | H | -0.8922  | -0.02669 | -1.97831 |              |          | 1010.321 | 1011.642 | 1080.578 |
|                                 | C | 0.120293 | -0.55421 | -0.17031 |              |          | 1112.585 | 1129.302 | 1181.385 |
|                                 | C | 2.426051 | -0.33252 | 0.211216 |              |          | 1217.753 | 1267.44  | 1288.12  |
|                                 | H | 2.295937 | -1.20472 | 0.833556 |              |          | 1323.473 | 1333.663 | 1381.65  |
|                                 | C | 3.563394 | 0.301456 | 0.008333 |              |          | 1420.806 | 1425.752 | 1472.849 |
|                                 | H | 4.460902 | -0.05331 | 0.489545 |              |          | 1479.589 | 1505.164 | 1506.061 |
|                                 | H | 3.61824  | 1.170535 | -0.63106 |              |          | 1742.571 | 1839.012 | 3058.141 |
|                                 | O | 1.272012 | 0.115459 | -0.40141 |              |          | 3061.697 | 3105.841 | 3116.482 |
|                                 | O | 0.046722 | -1.51981 | 0.538573 |              |          | 3131.284 | 3146.847 | 3194.397 |
|                                 | H | -1.98324 | -0.57029 | -0.62442 |              |          | 3249.724 | 3292.808 | 3734.71  |
|                                 | O | -2.80854 | -1.41571 | -0.02757 |              |          |          |          |          |
|                                 | H | -2.11458 | -1.89283 | 0.461103 |              |          |          |          |          |
| <b>TS5</b>                      | C | 2.301906 | -1.17695 | 1.03885  | -460.8154394 | 0.155176 | -871.755 | 31.2325  | 71.8664  |



|                          |          |          |          |          |              |          |          |          |          |
|--------------------------|----------|----------|----------|----------|--------------|----------|----------|----------|----------|
| (C <sub>i</sub> )        | H        | 3.342718 | -1.05054 | 1.329816 |              |          | 75.4661  | 119.0543 | 134.9233 |
|                          | H        | 2.049794 | -2.23621 | 1.133735 |              |          | 157.1941 | 178.0615 | 221.7406 |
|                          | H        | 1.684604 | -0.61577 | 1.739151 |              |          | 271.5192 | 357.8893 | 434.6936 |
|                          | C        | 2.078867 | -0.70416 | -0.38123 |              |          | 437.4966 | 486.7224 | 577.8151 |
|                          | H        | 2.75309  | -1.19145 | -1.08523 |              |          | 634.7811 | 734.6338 | 766.0214 |
|                          | C        | 0.651188 | -0.81417 | -0.87344 |              |          | 881.7799 | 898.8237 | 906.4254 |
|                          | H        | 0.571546 | -0.49929 | -1.91699 |              |          | 932.1997 | 932.4404 | 1005.649 |
|                          | H        | 0.299654 | -1.84779 | -0.83762 |              |          | 1011.437 | 1058.716 | 1100.415 |
|                          | C        | -0.33098 | 0.031519 | -0.10684 |              |          | 1110.541 | 1156.574 | 1185.095 |
|                          | C        | -2.63367 | 0.311378 | 0.249604 |              |          | 1215.309 | 1243.78  | 1270.87  |
|                          | H        | -2.33087 | 1.165515 | 0.835732 |              |          | 1331.91  | 1363.288 | 1397.13  |
|                          | C        | -3.87637 | -0.08369 | 0.058938 |              |          | 1416.575 | 1428.064 | 1440.797 |
|                          | H        | -4.68373 | 0.47048  | 0.510553 |              |          | 1449.678 | 1491.719 | 1504.6   |
|                          | H        | -4.10601 | -0.95178 | -0.54171 |              |          | 1744.358 | 1840.018 | 3053.131 |
|                          | O        | -1.59462 | -0.39139 | -0.32711 |              |          | 3065.714 | 3103.326 | 3105.195 |
|                          | O        | -0.065   | 0.972515 | 0.590591 |              |          | 3125.319 | 3152.428 | 3194.627 |
|                          | H        | 2.407794 | 0.422394 | -0.44824 |              |          | 3250.532 | 3293.116 | 3729.387 |
|                          | O        | 2.552208 | 1.797527 | -0.36009 |              |          |          |          |          |
| H                        | 1.725011 | 1.921614 | 0.138363 |          |              |          |          |          |          |
| TS6<br>(C <sub>i</sub> ) | C        | -1.86851 | 0.776332 | 1.136631 | -460.8133187 | 0.156092 | -1105.6  | 31.6551  | 73.1819  |
|                          | H        | -2.5373  | 1.349084 | 1.774665 |              |          | 93.6391  | 121.2584 | 141.906  |
|                          | H        | -1.0813  | 0.314219 | 1.730462 |              |          | 159.4169 | 209.9431 | 254.3435 |
|                          | C        | -1.35159 | 1.550285 | -0.05729 |              |          | 370.0646 | 399.8902 | 428.2553 |
|                          | H        | -2.15758 | 2.124395 | -0.5122  |              |          | 468.285  | 480.7479 | 632.52   |
|                          | H        | -0.59405 | 2.265207 | 0.273098 |              |          | 722.7826 | 741.0015 | 801.1733 |
|                          | C        | -0.75108 | 0.643577 | -1.14537 |              |          | 834.4838 | 876.1607 | 895.265  |
|                          | H        | -1.53871 | 0.041834 | -1.59232 |              |          | 929.9318 | 944.5395 | 974.7753 |
|                          | H        | -0.2653  | 1.247351 | -1.90942 |              |          | 1008.858 | 1013.424 | 1077.255 |
|                          | C        | 0.249214 | -0.29934 | -0.54635 |              |          | 1098.526 | 1119.257 | 1181.964 |
|                          | C        | 2.449247 | -0.40753 | 0.266275 |              |          | 1210.805 | 1273.126 | 1308.034 |
|                          | H        | 2.190667 | -1.42443 | 0.519638 |              |          | 1319.221 | 1333.018 | 1349.704 |
|                          | C        | 3.616222 | 0.163147 | 0.488997 |              |          | 1391.023 | 1426.959 | 1471.167 |
|                          | H        | 4.401437 | -0.4038  | 0.963265 |              |          | 1477.543 | 1485.608 | 1494.276 |
|                          | H        | 3.805735 | 1.188437 | 0.206114 |              |          | 1744.28  | 1834.539 | 3060.647 |
|                          | O        | 1.438597 | 0.310234 | -0.34097 |              |          | 3097.113 | 3104.342 | 3118.526 |
|                          | O        | 0.031233 | -1.43926 | -0.23125 |              |          | 3165.768 | 3168.66  | 3194.73  |
|                          | H        | -2.52867 | -0.13952 | 0.750426 |              |          | 3246.414 | 3292.974 | 3700.317 |
| O                        | -2.93368 | -1.30079 | 0.18233  |          |              |          |          |          |          |
| H                        | -2.04518 | -1.68309 | 0.05806  |          |              |          |          |          |          |
| TS7<br>(C <sub>i</sub> ) | C        | -1.84885 | 1.640291 | 0.20115  | -460.8183228 | 0.160206 | -399.055 | 23.5206  | 47.8643  |
|                          | H        | -2.14957 | 2.59474  | -0.22778 |              |          | 55.5116  | 104.9579 | 143.7351 |
|                          | H        | -0.7693  | 1.675903 | 0.363573 |              |          | 187.3794 | 230.9024 | 274.5921 |
|                          | H        | -2.33142 | 1.540075 | 1.174448 |              |          | 301.3294 | 338.3533 | 385.9365 |
|                          | C        | -2.23087 | 0.485345 | -0.71644 |              |          | 427.095  | 498.9119 | 611.376  |
|                          | H        | -3.29932 | 0.507667 | -0.93174 |              |          | 696.3479 | 758.8436 | 783.1535 |
|                          | H        | -1.71052 | 0.578496 | -1.66933 |              |          | 820.1754 | 880.9189 | 893.0501 |
|                          | C        | -1.9019  | -0.87807 | -0.09747 |              |          | 923.457  | 950.4401 | 983.6882 |
|                          | H        | -2.49677 | -1.05699 | 0.79572  |              |          | 1002.254 | 1061.31  | 1102.075 |
|                          | H        | -2.09516 | -1.67739 | -0.81445 |              |          | 1112.955 | 1196.761 | 1219.824 |
|                          | C        | -0.46318 | -0.95522 | 0.318385 |              |          | 1279.621 | 1288.538 | 1323.283 |

|                                 |   |          |          |          |              |          |          |          |          |
|---------------------------------|---|----------|----------|----------|--------------|----------|----------|----------|----------|
|                                 | C | 1.710373 | -0.75429 | -0.46753 |              |          | 1365.52  | 1381.349 | 1426.891 |
|                                 | H | 2.044679 | -1.58289 | 0.140566 |              |          | 1431.699 | 1475.32  | 1496.088 |
|                                 | C | 2.495758 | 0.24834  | -0.87982 |              |          | 1506.391 | 1513.419 | 1645.033 |
|                                 | H | 3.56028  | 0.188468 | -0.72286 |              |          | 1856.726 | 3052.717 | 3079.205 |
|                                 | H | 2.105517 | 1.026554 | -1.51644 |              |          | 3086.634 | 3107.792 | 3128.38  |
|                                 | O | 0.366874 | -0.72467 | -0.74    |              |          | 3139.364 | 3150.151 | 3205.342 |
|                                 | O | -0.04471 | -1.15078 | 1.42304  |              |          | 3225.325 | 3307.225 | 3752.646 |
|                                 | O | 2.027832 | 1.462303 | 0.793138 |              |          |          |          |          |
|                                 | H | 1.773624 | 0.792124 | 1.449235 |              |          |          |          |          |
| <b>TS8</b><br>(C <sub>i</sub> ) | C | -2.13444 | 1.418836 | 0.329322 | -460.8183695 | 0.159663 | -356.709 | 27.9521  | 56.568   |
|                                 | H | -2.45252 | 2.414439 | 0.023437 |              |          | 70.5362  | 108.9899 | 133.7443 |
|                                 | H | -1.14773 | 1.507579 | 0.787269 |              |          | 166.4759 | 214.1519 | 233.905  |
|                                 | H | -2.82751 | 1.061419 | 1.092066 |              |          | 281.2075 | 290.7848 | 388.96   |
|                                 | C | -2.0999  | 0.468515 | -0.86099 |              |          | 432.0712 | 470.1298 | 626.0858 |
|                                 | H | -3.07267 | 0.438104 | -1.35239 |              |          | 666.6536 | 683.97   | 704.5309 |
|                                 | H | -1.37974 | 0.82087  | -1.59985 |              |          | 814.351  | 865.298  | 885.6439 |
|                                 | C | -1.73218 | -0.96223 | -0.44998 |              |          | 892.7244 | 920.531  | 1006.749 |
|                                 | H | -2.47634 | -1.376   | 0.227281 |              |          | 1015.702 | 1065.308 | 1100.538 |
|                                 | H | -1.65855 | -1.60119 | -1.33083 |              |          | 1113.959 | 1210.978 | 1216.719 |
|                                 | C | -0.41735 | -0.99569 | 0.270533 |              |          | 1275.393 | 1285.09  | 1309.661 |
|                                 | C | 1.81871  | -0.38428 | -0.01586 |              |          | 1362.55  | 1378.734 | 1424.654 |
|                                 | H | 1.923306 | -0.67908 | 1.016401 |              |          | 1427.366 | 1476.815 | 1494.446 |
|                                 | C | 2.836814 | 0.004895 | -0.80046 |              |          | 1504.608 | 1512.642 | 1631.57  |
|                                 | H | 3.814111 | 0.1439   | -0.36832 |              |          | 1883.151 | 3057.454 | 3076.256 |
|                                 | H | 2.683654 | 0.203284 | -1.85164 |              |          | 3086.93  | 3108.033 | 3130.675 |
|                                 | O | 0.595705 | -0.6049  | -0.57027 |              |          | 3138.238 | 3150.052 | 3190.791 |
|                                 | O | -0.23196 | -1.29588 | 1.409787 |              |          | 3253.6   | 3300.464 | 3786.454 |
|                                 | O | 1.545608 | 1.605131 | 0.734072 |              |          |          |          |          |
|                                 | H | 1.689264 | 2.131553 | -0.06754 |              |          |          |          |          |
| <b>TS9</b><br>(C <sub>i</sub> ) | C | 1.727131 | 1.646003 | -0.40435 | -460.8234558 | 0.158462 | -1709.87 | 55.9749  | 81.597   |
|                                 | H | 2.547479 | 2.341936 | -0.57183 |              |          | 85.7677  | 128.7342 | 184.5068 |
|                                 | H | 0.839936 | 2.212969 | -0.12527 |              |          | 199.8507 | 274.9579 | 291.1453 |
|                                 | H | 1.520366 | 1.141837 | -1.34909 |              |          | 359.1422 | 426.3414 | 476.1802 |
|                                 | C | 2.091078 | 0.632919 | 0.674447 |              |          | 551.5047 | 570.2371 | 619.657  |
|                                 | H | 2.983211 | 0.075839 | 0.36836  |              |          | 730.9913 | 758.5814 | 858.8356 |
|                                 | H | 2.346333 | 1.141134 | 1.604786 |              |          | 885.3355 | 914.8748 | 941.1167 |
|                                 | C | 0.997534 | -0.3634  | 0.949    |              |          | 949.3159 | 1035.52  | 1081.994 |
|                                 | H | 1.169868 | -1.01142 | 1.807813 |              |          | 1107.749 | 1121.002 | 1122.659 |
|                                 | H | -0.253   | 0.073277 | 1.232169 |              |          | 1167.49  | 1176.896 | 1234.14  |
|                                 | C | 0.495619 | -1.15465 | -0.22007 |              |          | 1291.432 | 1313.929 | 1361.229 |
|                                 | C | -1.44449 | -0.46782 | 0.817931 |              |          | 1373.391 | 1375.29  | 1390.829 |
|                                 | H | -1.86199 | -1.04346 | 1.640776 |              |          | 1415.122 | 1423.527 | 1472.922 |
|                                 | C | -2.33796 | 0.575884 | 0.217475 |              |          | 1493.232 | 1500.381 | 1511.718 |
|                                 | H | -3.21199 | 0.091809 | -0.23783 |              |          | 1728.821 | 1901.638 | 3006.376 |
|                                 | H | -2.69658 | 1.242728 | 1.000523 |              |          | 3034.76  | 3067.373 | 3095.905 |
|                                 | O | -0.86804 | -1.28615 | -0.1696  |              |          | 3117.818 | 3119.67  | 3135.762 |
|                                 | O | 1.128316 | -1.61795 | -1.11657 |              |          | 3137.145 | 3147.279 | 3857.58  |
|                                 | O | -1.65668 | 1.368521 | -0.72855 |              |          |          |          |          |
|                                 | H | -1.38589 | 0.804274 | -1.4593  |              |          |          |          |          |
| <b>TS10</b>                     | C | 3.661585 | 0.650844 | 0.922895 | -460.8198129 | 0.158083 | -405.66  | 43.4453  | 53.6987  |

|                                  |          |          |          |          |              |          |          |          |          |
|----------------------------------|----------|----------|----------|----------|--------------|----------|----------|----------|----------|
| (C <sub>i</sub> )                | H        | 4.422583 | 1.246083 | 0.441673 |              |          | 71.6825  | 103.9772 | 111.968  |
|                                  | H        | 3.954592 | -0.29798 | 1.342738 |              |          | 169.7736 | 216.4459 | 277.4538 |
|                                  | H        | 2.822402 | 1.163766 | 1.365244 |              |          | 333.7584 | 362.5265 | 444.9398 |
|                                  | C        | 2.524367 | -0.07121 | -0.98164 |              |          | 480.2846 | 494.7846 | 519.571  |
|                                  | H        | 2.326765 | 0.978528 | -1.14996 |              |          | 561.2992 | 635.2159 | 688.4863 |
|                                  | H        | 3.433611 | -0.48688 | -1.39091 |              |          | 811.1814 | 823.0077 | 844.5514 |
|                                  | C        | 1.526867 | -0.87265 | -0.55988 |              |          | 911.2834 | 975.9025 | 982.5608 |
|                                  | H        | 1.627885 | -1.94568 | -0.49171 |              |          | 1000.091 | 1076.998 | 1092.578 |
|                                  | C        | 0.264862 | -0.28142 | -0.10671 |              |          | 1103.179 | 1154.325 | 1249.283 |
|                                  | C        | -1.89724 | -0.76766 | 0.748739 |              |          | 1254.5   | 1316.262 | 1319.758 |
|                                  | H        | -2.37107 | -1.69044 | 1.072989 |              |          | 1394.689 | 1409.299 | 1422.632 |
|                                  | C        | -2.78404 | -0.03345 | -0.25076 |              |          | 1429.894 | 1442.132 | 1461.337 |
|                                  | H        | -2.56418 | -0.41614 | -1.25478 |              |          | 1493.129 | 1505.791 | 1608.08  |
|                                  | H        | -3.82324 | -0.27599 | -0.0276  |              |          | 1772.399 | 3023.201 | 3088.146 |
|                                  | O        | -0.64097 | -1.21204 | 0.207812 |              |          | 3106.816 | 3125.131 | 3155.64  |
|                                  | O        | 0.05698  | 0.910949 | -0.0134  |              |          | 3176.017 | 3231.534 | 3272.675 |
|                                  | O        | -2.68499 | 1.366136 | -0.18982 |              |          | 3290.355 | 3298.734 | 3777.408 |
|                                  | H        | -1.74442 | 1.585891 | -0.19309 |              |          |          |          |          |
|                                  | H        | -1.71145 | -0.12831 | 1.612773 |              |          |          |          |          |
| <b>TS11</b><br>(C <sub>i</sub> ) | C        | 0.623535 | 2.069685 | -0.68761 | -460.8286728 | 0.158387 | -1599.28 | 67.9075  | 82.8138  |
|                                  | H        | -0.17367 | 2.810227 | -0.6757  |              |          | 99.9094  | 150.9158 | 179.8725 |
|                                  | H        | 0.377598 | 1.33209  | -1.45412 |              |          | 212.7005 | 256.163  | 332.4058 |
|                                  | H        | 1.548208 | 2.565575 | -0.9975  |              |          | 380.7204 | 462.1904 | 476.2457 |
|                                  | C        | 0.789767 | 1.415517 | 0.65716  |              |          | 536.2388 | 557.0686 | 608.3045 |
|                                  | H        | 0.905452 | 2.100248 | 1.492541 |              |          | 690.7266 | 797.2591 | 850.391  |
|                                  | H        | -0.32498 | 0.73592  | 0.922592 |              |          | 897.2886 | 916.3978 | 945.0109 |
|                                  | C        | 1.726276 | 0.231442 | 0.700044 |              |          | 959.4721 | 1044.805 | 1087.603 |
|                                  | H        | 2.721865 | 0.452956 | 0.315681 |              |          | 1103.726 | 1122.964 | 1143.669 |
|                                  | H        | 1.836246 | -0.1293  | 1.72583  |              |          | 1171.192 | 1218.408 | 1230.1   |
|                                  | C        | 1.19873  | -0.92119 | -0.1333  |              |          | 1267.091 | 1310.772 | 1346.54  |
|                                  | C        | -0.92654 | -0.48323 | 0.903888 |              |          | 1362.119 | 1375.442 | 1402.665 |
|                                  | H        | -0.8443  | -0.88831 | 1.912571 |              |          | 1416.42  | 1425.435 | 1462.836 |
|                                  | C        | -2.32183 | -0.35896 | 0.372992 |              |          | 1483.221 | 1491.24  | 1493.761 |
|                                  | H        | -2.76652 | -1.35591 | 0.259097 |              |          | 1585.482 | 1877.27  | 3008.581 |
|                                  | H        | -2.92814 | 0.199905 | 1.084501 |              |          | 3037.925 | 3066.687 | 3097.062 |
|                                  | O        | -0.13197 | -1.18582 | -0.02043 |              |          | 3102.77  | 3120.308 | 3123.071 |
|                                  | O        | 1.859111 | -1.58153 | -0.87576 |              |          | 3138.086 | 3148.42  | 3860.467 |
|                                  | O        | -2.35769 | 0.344029 | -0.85018 |              |          |          |          |          |
| H                                | -1.84698 | -0.15637 | -1.49356 |          |              |          |          |          |          |
| <b>TS12</b><br>(C <sub>i</sub> ) | C        | -4.03878 | -0.13922 | 0.168582 | -460.8051883 | 0.15595  | -795.956 | 55.4975  | 79.0365  |
|                                  | H        | -4.21276 | 0.900583 | 0.437494 |              |          | 110.2923 | 130.8682 | 185.6926 |
|                                  | H        | -4.41918 | -0.77528 | 0.9713   |              |          | 192.7181 | 196.7661 | 282.2385 |
|                                  | H        | -4.62418 | -0.37716 | -0.72109 |              |          | 337.442  | 383.004  | 410.8069 |
|                                  | C        | -2.59712 | -0.41524 | -0.06363 |              |          | 420.8458 | 449.6081 | 510.291  |
|                                  | H        | -2.31054 | -1.41722 | -0.36451 |              |          | 560.8253 | 740.2776 | 747.6671 |
|                                  | C        | -1.61288 | 0.478606 | 0.121648 |              |          | 836.2192 | 872.4145 | 922.7546 |
|                                  | H        | -1.81584 | 1.519424 | 0.335722 |              |          | 986.207  | 991.1422 | 1020.047 |
|                                  | H        | -1.05511 | 0.364717 | 1.957663 |              |          | 1070.126 | 1085.338 | 1091.978 |
|                                  | C        | -0.21324 | 0.123101 | -0.21659 |              |          | 1138.861 | 1152.543 | 1238.021 |
|                                  | C        | 1.984911 | 0.977546 | -0.42354 |              |          | 1252.475 | 1311.852 | 1317.416 |

|                   |   |          |          |          |              |          |          |          |          |
|-------------------|---|----------|----------|----------|--------------|----------|----------|----------|----------|
|                   | H | 2.093758 | 0.558679 | -1.42431 |              |          | 1350.437 | 1398.362 | 1409.477 |
|                   | C | 2.68651  | 0.076929 | 0.590202 |              |          | 1418.015 | 1458.928 | 1478.939 |
|                   | H | 3.686299 | 0.470364 | 0.771968 |              |          | 1486.281 | 1494.755 | 1504.758 |
|                   | H | 2.132999 | 0.128362 | 1.536493 |              |          | 1681.644 | 1805.238 | 3016.655 |
|                   | O | 0.588338 | 1.183246 | -0.14187 |              |          | 3053.613 | 3092.153 | 3106.36  |
|                   | O | 0.160998 | -0.9855  | -0.51821 |              |          | 3111.787 | 3148.602 | 3161.206 |
|                   | O | 2.860403 | -1.24719 | 0.155625 |              |          | 3185.224 | 3210.637 | 3799.293 |
|                   | H | 1.99478  | -1.5704  | -0.12328 |              |          |          |          |          |
|                   | H | 2.395445 | 1.983186 | -0.40185 |              |          |          |          |          |
| <b>TS13</b>       | C | -2.44814 | 1.195022 | 0.317749 | -460.8171116 | 0.161026 | -332.713 | 45.8236  | 67.5375  |
| (C <sub>i</sub> ) | H | -2.84564 | 0.63777  | 1.164478 |              |          | 93.705   | 101.4533 | 145.2925 |
|                   | H | -3.22225 | 1.868785 | -0.055   |              |          | 155.6461 | 181.2515 | 237.3969 |
|                   | H | -1.62244 | 1.820905 | 0.664265 |              |          | 296.2095 | 345.2059 | 383.4139 |
|                   | C | -1.97275 | 0.279587 | -0.7555  |              |          | 433.2951 | 476.289  | 543.18   |
|                   | H | -1.53264 | 0.739573 | -1.63353 |              |          | 684.503  | 738.6296 | 861.3232 |
|                   | C | -1.95876 | -1.0638  | -0.64911 |              |          | 911.3343 | 932.8735 | 944.1844 |
|                   | H | -2.46127 | -1.55417 | 0.175085 |              |          | 949.3041 | 1010.93  | 1032.08  |
|                   | H | -1.65079 | -1.68558 | -1.4783  |              |          | 1056.118 | 1104.422 | 1117.082 |
|                   | C | 0.007247 | -1.2251  | 0.399788 |              |          | 1158.472 | 1199.128 | 1256.004 |
|                   | C | 2.150046 | -0.44593 | -0.2013  |              |          | 1301.684 | 1306.88  | 1366.194 |
|                   | H | 2.383173 | -0.64919 | 0.844053 |              |          | 1397.475 | 1403.452 | 1440.078 |
|                   | C | 2.013731 | 1.037302 | -0.45869 |              |          | 1450.353 | 1473.069 | 1493.064 |
|                   | H | 2.970503 | 1.5107   | -0.20991 |              |          | 1494.503 | 1512.882 | 1632.748 |
|                   | H | 1.817107 | 1.210076 | -1.51738 |              |          | 1821.367 | 3029.929 | 3049.839 |
|                   | O | 0.928752 | -1.139   | -0.54751 |              |          | 3090.975 | 3103.008 | 3105.935 |
|                   | O | 0.078725 | -0.84789 | 1.528098 |              |          | 3140.133 | 3157.099 | 3159.674 |
|                   | O | 0.949953 | 1.628861 | 0.252996 |              |          | 3174.295 | 3251.244 | 3823.859 |
|                   | H | 0.834443 | 1.176608 | 1.096202 |              |          |          |          |          |
|                   | H | 2.922112 | -0.87375 | -0.8363  |              |          |          |          |          |
| <b>TS14</b>       | C | -1.6943  | 1.343312 | 0.4813   | -460.8386858 | 0.159146 | -1652.78 | 77.9339  | 142.1633 |
| (C <sub>i</sub> ) | H | -2.03313 | 2.357175 | 0.287437 |              |          | 179.0666 | 231.8206 | 247.9626 |
|                   | H | -0.34741 | 1.469641 | 0.353215 |              |          | 331.9973 | 359.8975 | 367.9036 |
|                   | H | -1.7969  | 1.072426 | 1.530483 |              |          | 469.6662 | 478.6501 | 525.2053 |
|                   | C | -2.21231 | 0.30954  | -0.49259 |              |          | 542.9672 | 551.2502 | 676.9327 |
|                   | H | -3.30581 | 0.298317 | -0.48024 |              |          | 723.4765 | 745.2081 | 832.3093 |
|                   | H | -1.91186 | 0.577191 | -1.50547 |              |          | 858.7438 | 897.8763 | 930.9835 |
|                   | C | -1.69991 | -1.10753 | -0.17755 |              |          | 940.9309 | 985.6656 | 1048.441 |
|                   | H | -2.18203 | -1.52361 | 0.703965 |              |          | 1078.058 | 1095.336 | 1107.529 |
|                   | H | -1.86552 | -1.76946 | -1.02673 |              |          | 1126.459 | 1169.124 | 1216.932 |
|                   | C | -0.23252 | -0.9856  | 0.114015 |              |          | 1240.739 | 1288.079 | 1339.427 |
|                   | C | 1.527724 | 0.42233  | -0.57737 |              |          | 1350.234 | 1367.981 | 1390.254 |
|                   | H | 1.834758 | 0.821723 | -1.53931 |              |          | 1406.576 | 1433.13  | 1450.512 |
|                   | C | 1.015211 | 1.520671 | 0.33548  |              |          | 1459.223 | 1471.542 | 1474.182 |
|                   | H | 1.261255 | 1.372427 | 1.381927 |              |          | 1487.611 | 1825.586 | 3049.714 |
|                   | H | 1.24924  | 2.52263  | -0.00777 |              |          | 3096.912 | 3098.41  | 3108.149 |
|                   | O | 0.431172 | -0.46318 | -0.92859 |              |          | 3130.61  | 3146.978 | 3157.178 |
|                   | O | 0.280547 | -1.19693 | 1.184035 |              |          | 3180.957 | 3212.033 | 3802.613 |
|                   | O | 2.607346 | -0.28045 | -0.07416 |              |          |          |          |          |
|                   | H | 2.321495 | -0.69034 | 0.752495 |              |          |          |          |          |
| <b>TS15</b>       | C | 2.250142 | 1.428319 | -0.22437 | -460.8357384 | 0.160271 | -561.71  | 54.3794  | 61.1863  |

|                                  |          |          |          |          |              |          |          |          |          |
|----------------------------------|----------|----------|----------|----------|--------------|----------|----------|----------|----------|
| (C <sub>i</sub> )                | H        | 1.446152 | 1.952719 | 0.274333 |              |          | 77.5814  | 145.9614 | 158.0415 |
|                                  | H        | 2.576155 | 1.815669 | -1.17978 |              |          | 223.5957 | 247.2438 | 253.5349 |
|                                  | C        | 2.75797  | 0.278281 | 0.278235 |              |          | 352.8881 | 384.3952 | 439.3185 |
|                                  | H        | 3.632039 | -0.17523 | -0.17037 |              |          | 476.8988 | 523.0335 | 570.3652 |
|                                  | H        | 2.521396 | -0.02472 | 1.289897 |              |          | 659.6978 | 724.1112 | 744.7041 |
|                                  | C        | 1.475441 | -1.38115 | -0.47264 |              |          | 789.2601 | 827.8754 | 835.009  |
|                                  | H        | 1.673852 | -1.30909 | -1.52978 |              |          | 924.8213 | 934.756  | 984.7614 |
|                                  | H        | 1.955727 | -2.1563  | 0.103374 |              |          | 1007.64  | 1028.714 | 1044.798 |
|                                  | C        | 0.221104 | -0.87384 | 0.03923  |              |          | 1100.973 | 1122.295 | 1186.522 |
|                                  | C        | -1.60906 | 0.588367 | -0.4261  |              |          | 1246.438 | 1301.643 | 1308.474 |
|                                  | H        | -1.79512 | 1.28281  | -1.24172 |              |          | 1346.747 | 1401.573 | 1421.153 |
|                                  | C        | -2.77056 | -0.37007 | -0.26065 |              |          | 1460.555 | 1469.399 | 1472.618 |
|                                  | H        | -2.58402 | -1.06159 | 0.557791 |              |          | 1492.334 | 1505.611 | 1586.952 |
|                                  | H        | -3.66966 | 0.204731 | -0.04618 |              |          | 1745.965 | 3080.665 | 3132.237 |
|                                  | O        | -0.42393 | -0.11372 | -0.86304 |              |          | 3153.303 | 3156.999 | 3164.534 |
|                                  | O        | -0.17344 | -1.04305 | 1.17901  |              |          | 3172.235 | 3190.079 | 3235.224 |
|                                  | O        | -1.35288 | 1.360963 | 0.695664 |              |          | 3263.376 | 3304.717 | 3788.515 |
|                                  | H        | -1.18281 | 0.752091 | 1.426717 |              |          |          |          |          |
| H                                | -2.92194 | -0.93401 | -1.17949 |          |              |          |          |          |          |
| <b>TS16</b><br>(C <sub>i</sub> ) | C        | 2.697702 | -0.75265 | -0.56374 | -460.8387519 | 0.158217 | -1570.29 | 77.1237  | 78.8618  |
|                                  | H        | 3.773495 | -0.90313 | -0.49112 |              |          | 132.6783 | 152.3557 | 199.0392 |
|                                  | H        | 2.520095 | 0.082629 | -1.24026 |              |          | 283.2991 | 337.418  | 362.3299 |
|                                  | H        | 2.260945 | -1.65122 | -1.00211 |              |          | 410.5715 | 430.5057 | 479.7192 |
|                                  | C        | 2.091925 | -0.47035 | 0.807599 |              |          | 518.0927 | 537.2128 | 610.6975 |
|                                  | H        | 2.289179 | -1.30036 | 1.485826 |              |          | 699.4471 | 751.5487 | 774.1703 |
|                                  | H        | 2.565331 | 0.416793 | 1.237709 |              |          | 859.4477 | 911.6448 | 915.1392 |
|                                  | C        | 0.606359 | -0.2285  | 0.74952  |              |          | 954.0972 | 972.2451 | 1067.189 |
|                                  | H        | -0.02944 | -1.14648 | 0.061573 |              |          | 1089.082 | 1104.498 | 1110.315 |
|                                  | H        | 0.066893 | -0.30835 | 1.690444 |              |          | 1128.388 | 1144.012 | 1203.244 |
|                                  | C        | 0.18465  | 0.985609 | -0.00942 |              |          | 1263.021 | 1293.949 | 1340.621 |
|                                  | C        | -1.89607 | -0.19122 | -0.40276 |              |          | 1359.896 | 1370.106 | 1412.664 |
|                                  | H        | -2.69547 | 0.000168 | -1.12219 |              |          | 1415.731 | 1424.531 | 1462.978 |
|                                  | C        | -1.12659 | -1.43783 | -0.72085 |              |          | 1475.604 | 1502.492 | 1512.402 |
|                                  | H        | -1.56576 | -2.35198 | -0.34223 |              |          | 1551.571 | 1852.551 | 3051.368 |
|                                  | H        | -0.74495 | -1.48706 | -1.73452 |              |          | 3063.51  | 3067.574 | 3103.677 |
|                                  | O        | -1.08085 | 0.97808  | -0.51601 |              |          | 3132.684 | 3143.98  | 3144.44  |
|                                  | O        | 0.885332 | 1.932644 | -0.2231  |              |          | 3146.391 | 3241.638 | 3866.394 |
| O                                | -2.41027 | -0.31601 | 0.890045 |          |              |          |          |          |          |
| H                                | -2.94185 | 0.460866 | 1.087283 |          |              |          |          |          |          |
| <b>TS17</b><br>(C <sub>i</sub> ) | C        | -3.69348 | -0.22284 | 1.122584 | -460.8367147 | 0.15806  | -411.145 | 46.4752  | 56.098   |
|                                  | H        | -4.61508 | 0.284036 | 0.880126 |              |          | 106.2551 | 123.6035 | 138.0164 |
|                                  | H        | -2.95579 | 0.315451 | 1.696221 |              |          | 171.9879 | 236.4328 | 275.539  |
|                                  | H        | -3.71718 | -1.29732 | 1.208305 |              |          | 319.5079 | 338.603  | 426.832  |
|                                  | C        | -2.61206 | 0.008749 | -0.9295  |              |          | 467.2132 | 487.5969 | 496.9447 |
|                                  | H        | -3.43642 | -0.46606 | -1.44139 |              |          | 558.383  | 591.7204 | 663.6271 |
|                                  | H        | -2.67738 | 1.071586 | -0.74105 |              |          | 703.614  | 809.2359 | 845.8663 |
|                                  | C        | -1.42098 | -0.61019 | -0.81368 |              |          | 878.9007 | 930.6983 | 961.9264 |
|                                  | H        | -1.26462 | -1.63792 | -1.10662 |              |          | 985.0477 | 1000.747 | 1082.478 |
|                                  | C        | -0.29101 | 0.099409 | -0.20723 |              |          | 1091.877 | 1131.029 | 1191.813 |
|                                  | C        | 1.983718 | -0.00078 | 0.387783 |              |          | 1252.198 | 1308.403 | 1318.063 |

|                                |   |          |          |          |              |          |          |          |          |
|--------------------------------|---|----------|----------|----------|--------------|----------|----------|----------|----------|
|                                | H | 1.687434 | 0.244359 | 1.410447 |              |          | 1398.02  | 1407.792 | 1422.926 |
|                                | C | 3.101552 | -1.00436 | 0.337496 |              |          | 1430.605 | 1442.503 | 1480.268 |
|                                | H | 3.979602 | -0.58863 | 0.826307 |              |          | 1490.804 | 1496.72  | 1606.711 |
|                                | H | 2.807219 | -1.92336 | 0.839141 |              |          | 1771.232 | 3074.081 | 3084.298 |
|                                | O | 0.837108 | -0.62498 | -0.22938 |              |          | 3123.484 | 3166.461 | 3169.843 |
|                                | O | -0.34902 | 1.212548 | 0.273529 |              |          | 3175.979 | 3230.37  | 3272.344 |
|                                | O | 2.359245 | 1.137872 | -0.30466 |              |          | 3288.394 | 3297.283 | 3819.711 |
|                                | H | 1.665436 | 1.794829 | -0.17026 |              |          |          |          |          |
|                                | H | 3.341733 | -1.22038 | -0.70192 |              |          |          |          |          |
| <b>P1</b><br>(C <sub>i</sub> ) | C | -2.6551  | 0.694142 | 0.753487 | -384.3898473 | 0.13514  | 42.7485  | 70.3725  | 128.7419 |
|                                | H | -3.5634  | 1.269015 | 0.57939  |              |          | 164.7704 | 184.0309 | 240.4472 |
|                                | H | -1.85006 | 1.39654  | 0.96616  |              |          | 310.9822 | 341.3503 | 425.3568 |
|                                | H | -2.81422 | 0.077145 | 1.639323 |              |          | 520.5141 | 583.642  | 680.819  |
|                                | C | -2.31328 | -0.1704  | -0.45375 |              |          | 724.2459 | 780.9902 | 839.9085 |
|                                | H | -3.13934 | -0.8484  | -0.6705  |              |          | 891.9359 | 898.7731 | 912.5343 |
|                                | H | -2.17471 | 0.459304 | -1.33272 |              |          | 920.0493 | 1048.61  | 1078.449 |
|                                | C | -1.05544 | -0.99862 | -0.23793 |              |          | 1107.832 | 1137.83  | 1203.219 |
|                                | H | -1.105   | -1.5741  | 0.6879   |              |          | 1255.031 | 1303.421 | 1349.384 |
|                                | H | -0.91249 | -1.72599 | -1.04083 |              |          | 1378.5   | 1407.153 | 1417.114 |
|                                | C | 0.196233 | -0.15959 | -0.2027  |              |          | 1459.938 | 1489.047 | 1503.097 |
|                                | C | 2.513143 | -0.32902 | 0.325234 |              |          | 1512.755 | 1676.809 | 1852.982 |
|                                | H | 3.195515 | -1.07704 | 0.707672 |              |          | 3062.448 | 3069.035 | 3078.314 |
|                                | C | 2.912195 | 0.870949 | 0.012227 |              |          | 3106.452 | 3116.358 | 3134.438 |
|                                | H | 2.570912 | 1.813423 | -0.36393 |              |          | 3145.259 | 3198.87  | 3346.079 |
|                                | O | 1.241081 | -0.88803 | 0.253061 |              |          |          |          |          |
|                                | O | 0.284702 | 0.983693 | -0.54705 |              |          |          |          |          |
| <b>P2</b><br>(C <sub>i</sub> ) | C | 2.882358 | -0.54567 | 0.679852 | -384.3936333 | 0.135    | 37.7199  | 61.5022  | 94.7899  |
|                                | H | 3.867196 | -0.94758 | 0.447218 |              |          | 139.4692 | 175.357  | 230.6735 |
|                                | H | 2.198919 | -1.38488 | 0.802644 |              |          | 298.4527 | 337.9756 | 412.8628 |
|                                | H | 2.952653 | -0.01826 | 1.632475 |              |          | 468.7013 | 565.0609 | 629.0043 |
|                                | C | 2.399128 | 0.389469 | -0.42185 |              |          | 683.7571 | 798.1904 | 872.1647 |
|                                | H | 3.10678  | 1.208779 | -0.55081 |              |          | 887.0555 | 889.584  | 912.0288 |
|                                | H | 2.352225 | -0.14716 | -1.36962 |              |          | 992.4667 | 1073.018 | 1102.225 |
|                                | C | 1.029646 | 0.981413 | -0.12279 |              |          | 1118.85  | 1159.082 | 1173.827 |
|                                | H | 0.993206 | 1.439156 | 0.86758  |              |          | 1253.92  | 1303.638 | 1377.216 |
|                                | H | 0.767915 | 1.771366 | -0.83109 |              |          | 1399.099 | 1408.343 | 1418.515 |
|                                | C | -0.07073 | -0.03773 | -0.20269 |              |          | 1458.425 | 1489.619 | 1504.414 |
|                                | C | -2.32984 | -0.29528 | 0.28484  |              |          | 1513.258 | 1747.458 | 1886.294 |
|                                | C | -3.5842  | 0.010975 | 0.079502 |              |          | 3062.9   | 3069.132 | 3078.843 |
|                                | H | -4.35201 | -0.73881 | 0.190752 |              |          | 3105.774 | 3116.088 | 3135.088 |
|                                | H | -3.86908 | 1.017304 | -0.21028 |              |          | 3142.601 | 3146.724 | 3259.563 |
|                                | O | -1.24397 | 0.49062  | 0.293926 |              |          |          |          |          |
|                                | O | -0.00304 | -1.14299 | -0.63893 |              |          |          |          |          |
| <b>P3</b><br>(C <sub>i</sub> ) | C | -2.78815 | 0.483915 | 0.847517 | -384.3909558 | 0.135411 | 38.6572  | 90.3634  | 113.5448 |
|                                | H | -3.78077 | 0.914896 | 0.726231 |              |          | 156.9504 | 161.5876 | 230.2841 |
|                                | H | -2.08452 | 1.301541 | 0.999176 |              |          | 300.6696 | 352.6285 | 438.9521 |
|                                | H | -2.79809 | -0.13136 | 1.748609 |              |          | 483.1921 | 579.3578 | 673.7905 |
|                                | C | -2.39842 | -0.34557 | -0.36979 |              |          | 688.557  | 770.7682 | 815.4987 |
|                                | H | -3.12684 | -1.142   | -0.52473 |              |          | 875.6548 | 889.4953 | 912.3443 |
|                                | H | -2.41021 | 0.27946  | -1.26283 |              |          | 972.463  | 1072.744 | 1096.146 |

|                                |          |          |          |          |              |          |          |          |          |
|--------------------------------|----------|----------|----------|----------|--------------|----------|----------|----------|----------|
|                                | C        | -1.02096 | -0.97562 | -0.22714 |              |          | 1112.139 | 1153.041 | 1221.963 |
|                                | H        | -0.92432 | -1.53234 | 0.706549 |              |          | 1256.579 | 1293.815 | 1304.897 |
|                                | H        | -0.82152 | -1.69163 | -1.0283  |              |          | 1377.735 | 1408.44  | 1418.316 |
|                                | C        | 0.092133 | 0.034948 | -0.28311 |              |          | 1459.387 | 1488.858 | 1503.696 |
|                                | C        | 2.398707 | 0.25628  | 0.062812 |              |          | 1512.901 | 1715.222 | 1859.041 |
|                                | H        | 2.233409 | 1.271371 | -0.28187 |              |          | 3062.972 | 3069.28  | 3078.838 |
|                                | C        | 3.559061 | -0.21861 | 0.419388 |              |          | 3106.542 | 3116.682 | 3134.976 |
|                                | H        | 4.557045 | 0.173399 | 0.477143 |              |          | 3145.98  | 3176.197 | 3314.269 |
|                                | O        | 1.266484 | -0.53162 | 0.102932 |              |          |          |          |          |
|                                | O        | -0.00379 | 1.174691 | -0.63519 |              |          |          |          |          |
| <b>P4</b><br>(C <sub>i</sub> ) | C        | 3.057841 | 0.100977 | 0.835502 | -384.4241103 | 0.1355   | 49.4635  | 59.2468  | 97.6047  |
|                                | H        | 3.092146 | -0.75241 | 1.511858 |              |          | 154.1771 | 163.0441 | 239.1068 |
|                                | H        | 2.468782 | 0.889202 | 1.301448 |              |          | 305.8566 | 347.1732 | 428.9434 |
|                                | H        | 4.07333  | 0.466597 | 0.691158 |              |          | 484.1852 | 574.3254 | 693.425  |
|                                | C        | 2.435287 | -0.29167 | -0.51558 |              |          | 729.134  | 760.44   | 811.3872 |
|                                | H        | 2.414764 | 0.588898 | -1.15852 |              |          | 904.3894 | 918.7979 | 920.8197 |
|                                | H        | 3.047613 | -1.05484 | -0.99474 |              |          | 1011.181 | 1018.929 | 1052.674 |
|                                | C        | 1.052991 | -0.79268 | -0.34031 |              |          | 1107.37  | 1145.119 | 1192.992 |
|                                | H        | 0.836629 | -1.8435  | -0.21729 |              |          | 1226.654 | 1297.022 | 1329.587 |
|                                | C        | -0.04101 | 0.141355 | -0.23153 |              |          | 1332.899 | 1398.578 | 1424.682 |
|                                | C        | -2.36094 | 0.266265 | 0.092155 |              |          | 1461.448 | 1485.71  | 1502.371 |
|                                | H        | -2.19565 | 1.330261 | 0.010386 |              |          | 1511.069 | 1739.384 | 1763.97  |
|                                | C        | -3.53361 | -0.30596 | 0.291564 |              |          | 3067.526 | 3076.845 | 3121.253 |
|                                | H        | -4.41447 | 0.309096 | 0.384019 |              |          | 3143.417 | 3151.543 | 3194.599 |
|                                | H        | -3.63218 | -1.37932 | 0.364333 |              |          | 3228.351 | 3244.112 | 3292.566 |
|                                | O        | -1.22953 | -0.50128 | -0.02863 |              |          |          |          |          |
| O                              | 0.060233 | 1.343324 | -0.30682 |          |              |          |          |          |          |
| <b>P5</b><br>(C <sub>i</sub> ) | C        | 3.662812 | -0.44609 | -0.02122 | -384.4138163 | 0.133056 | 35.8639  | 61.1642  | 83.2738  |
|                                | H        | 3.837589 | -0.96972 | 0.92725  |              |          | 110.5803 | 125.7683 | 140.2168 |
|                                | H        | 4.494561 | 0.237152 | -0.17661 |              |          | 260.8614 | 299.7883 | 343.0207 |
|                                | H        | 3.701654 | -1.21195 | -0.8024  |              |          | 412.4441 | 472.3048 | 567.4644 |
|                                | C        | 2.359746 | 0.263579 | -0.02283 |              |          | 734.3549 | 735.6015 | 903.9821 |
|                                | H        | 2.300676 | 1.337444 | 0.055175 |              |          | 910.4407 | 925.6689 | 928.9054 |
|                                | C        | 1.102265 | -0.51874 | 0.032349 |              |          | 995.5143 | 1017.472 | 1021.669 |
|                                | H        | 1.028103 | -1.23529 | -0.79475 |              |          | 1112.953 | 1164.403 | 1187.659 |
|                                | H        | 1.043107 | -1.14331 | 0.935024 |              |          | 1198.763 | 1220.525 | 1321.169 |
|                                | C        | -0.14128 | 0.328419 | 0.008609 |              |          | 1334.189 | 1409.921 | 1425.94  |
|                                | C        | -2.48066 | 0.142499 | -0.00754 |              |          | 1439.241 | 1446.781 | 1478.986 |
|                                | H        | -2.45285 | 1.2218   | -0.01128 |              |          | 1489.239 | 1743.664 | 1867.109 |
|                                | C        | -3.57655 | -0.59087 | -0.01268 |              |          | 2998.195 | 3003.059 | 3030.753 |
|                                | H        | -4.5393  | -0.10516 | -0.02112 |              |          | 3049.465 | 3143.315 | 3193.977 |
|                                | H        | -3.53268 | -1.67032 | -0.00869 |              |          | 3239.813 | 3245.505 | 3291.894 |
|                                | O        | -1.24456 | -0.46461 | 0.003341 |              |          |          |          |          |
| O                              | -0.18531 | 1.522934 | 0.00132  |          |              |          |          |          |          |
| <b>P6</b><br>(C <sub>i</sub> ) | C        | 2.858105 | 0.48492  | 0.860857 | -384.4095008 | 0.13382  | 37.8712  | 76.1702  | 107.7465 |
|                                | H        | 2.473801 | 1.488333 | 0.952125 |              |          | 110.4393 | 153.0594 | 175.4237 |
|                                | H        | 3.400368 | 0.060553 | 1.691865 |              |          | 269.9395 | 347.3011 | 415.773  |
|                                | C        | 2.511671 | -0.3434  | -0.32508 |              |          | 464.2218 | 521.8999 | 581.7868 |
|                                | H        | 2.53854  | 0.267489 | -1.22902 |              |          | 675.2013 | 736.618  | 794.5697 |
|                                | H        | 3.233978 | -1.15026 | -0.44959 |              |          | 897.5206 | 901.2883 | 925.9165 |

|                                                         |   |          |          |          |              |          |           |          |          |
|---------------------------------------------------------|---|----------|----------|----------|--------------|----------|-----------|----------|----------|
|                                                         | C | 1.116102 | -0.96961 | -0.21904 |              |          | 968.7333  | 1015.184 | 1031.857 |
|                                                         | H | 0.926785 | -1.65846 | -1.04644 |              |          | 1087.746  | 1115.111 | 1183.616 |
|                                                         | H | 1.004523 | -1.54798 | 0.698661 |              |          | 1214.006  | 1227.608 | 1294.529 |
|                                                         | C | 0.026235 | 0.066262 | -0.25644 |              |          | 1332.829  | 1348.752 | 1399.18  |
|                                                         | C | -2.28872 | 0.313286 | 0.038901 |              |          | 1428.739  | 1457.374 | 1463.703 |
|                                                         | H | -2.09799 | 1.34287  | -0.22423 |              |          | 1487.49   | 1743.592 | 1860.235 |
|                                                         | C | -3.47147 | -0.19247 | 0.328757 |              |          | 3066.799  | 3070.627 | 3111.366 |
|                                                         | H | -4.34012 | 0.446343 | 0.311167 |              |          | 3121.147  | 3179.112 | 3193.01  |
|                                                         | H | -3.59103 | -1.23519 | 0.584886 |              |          | 3245.869  | 3285.944 | 3290.623 |
|                                                         | O | -1.17087 | -0.49157 | 0.05909  |              |          |           |          |          |
|                                                         | O | 0.16332  | 1.220617 | -0.54124 |              |          |           |          |          |
| <b>P7</b><br>(C <sub>1</sub> )                          | C | 3.133688 | -0.49968 | 0.180606 | -420.9973142 | 0.126202 | 64.3723   | 71.2674  | 135.4227 |
|                                                         | H | 2.877544 | -1.51514 | -0.09294 |              |          | 160.6259  | 219.5907 | 331.0409 |
|                                                         | H | 4.162892 | -0.27628 | 0.42323  |              |          | 357.4281  | 456.6033 | 507.5118 |
|                                                         | C | 2.197875 | 0.435629 | 0.211711 |              |          | 542.3987  | 552.9166 | 683.7288 |
|                                                         | H | 2.401291 | 1.462972 | 0.47791  |              |          | 822.2014  | 849.3392 | 909.2239 |
|                                                         | C | 0.795349 | 0.097228 | -0.12949 |              |          | 978.1369  | 1030.968 | 1038.438 |
|                                                         | C | -1.37856 | 1.005022 | -0.41584 |              |          | 1073.738  | 1087.802 | 1096.988 |
|                                                         | H | -1.75855 | 2.022868 | -0.40427 |              |          | 1154.158  | 1251.576 | 1257.586 |
|                                                         | C | -2.18476 | 0.116844 | 0.526034 |              |          | 1315.285  | 1343.152 | 1395.106 |
|                                                         | H | -1.73884 | 0.176259 | 1.526218 |              |          | 1413.316  | 1447.014 | 1459.064 |
|                                                         | H | -3.1952  | 0.519938 | 0.593539 |              |          | 1493.257  | 1504.617 | 1725.914 |
|                                                         | O | 0.002602 | 1.163632 | -0.03894 |              |          | 1806.767  | 3023.658 | 3091.658 |
|                                                         | O | 0.4106   | -1.00224 | -0.45077 |              |          | 3109.35   | 3161.048 | 3173.196 |
|                                                         | O | -2.32113 | -1.21075 | 0.089909 |              |          | 3227.05   | 3268.85  | 3790.768 |
|                                                         | H | -1.43873 | -1.53205 | -0.13386 |              |          |           |          |          |
|                                                         | H | -1.42851 | 0.606056 | -1.42954 |              |          |           |          |          |
| <b>P8</b><br>(C <sub>1</sub> )                          | C | -4.04894 | -0.14051 | 0.248407 | -460.3118825 | 0.154138 | 55.6352   | 65.9022  | 120.7958 |
|                                                         | H | -4.22789 | 0.897156 | 0.522012 |              |          | 125.3131  | 197.6149 | 211.7831 |
|                                                         | H | 2.468934 | -1.78928 | 0.786869 |              |          | 1490.712  | 1495.328 | 1726.113 |
|                                                         | O | 0.297877 | -0.64536 | -0.03962 |              |          | 1805.795  | 3078.874 | 3085.328 |
|                                                         | O | -0.8274  | 1.231483 | 0.44201  |              |          | 3167.61   | 3171.293 | 3173.441 |
|                                                         | O | 1.730083 | 1.096106 | -0.62912 |              |          | 3226.541  | 3269.207 | 3823.876 |
|                                                         | H | 1.067003 | 1.771644 | -0.44307 |              |          |           |          |          |
|                                                         | H | 2.686781 | -1.28827 | -0.90351 |              |          |           |          |          |
| <b>H</b><br>(D <sub>∞h</sub> )                          | H | 0        | 0        | 0        | -0.4982065   | 0        |           |          |          |
| <b>H<sub>2</sub>O</b><br>(C <sub>2v</sub> )             | O | 0        | 0        | 0.116392 | -76.4301067  | 0.02093  | 1619.5383 | 3869.626 | 3972.571 |
|                                                         | H | 0        | 0.762467 | -0.46557 |              |          |           |          |          |
|                                                         | H | 0        | -0.76247 | -0.46557 |              |          |           |          |          |
| <b>CH<sub>3</sub></b><br>(D <sub>3h</sub> )             | C | -3E-06   | 0.000018 | 0.000046 | -39.8253538  | 0.028859 | 432.1876  | 1411.548 | 1411.95  |
|                                                         | H | 0.880838 | 0.617978 | -9.3E-05 |              |          | 3145.682  | 3322.149 | 3322.566 |
|                                                         | H | -0.97567 | 0.453717 | -9.3E-05 |              |          |           |          |          |
|                                                         | H | 0.09485  | -1.07181 | -9.3E-05 |              |          |           |          |          |
| <b>C<sub>2</sub>H<sub>4</sub></b><br>(D <sub>2h</sub> ) | C | -0.66105 | -4E-06   | -7.6E-05 | -78.5728476  | 0.049824 | 825.6164  | 989.1604 | 1002.481 |
|                                                         | H | -1.22751 | 0.921938 | -0.00003 |              |          | 1059.512  | 1241.551 | 1386.222 |
|                                                         | H | -1.22755 | -0.92192 | -4.4E-05 |              |          | 1473.304  | 1714.294 | 3159.595 |
|                                                         | C | 0.66105  | -4E-06   | 0.000033 |              |          | 3175.56   | 3234.758 | 3261.209 |
|                                                         | H | 1.22756  | -0.92191 | 0.000173 |              |          |           |          |          |
|                                                         | H | 1.227515 | 0.921934 | 0.000158 |              |          |           |          |          |



|                                                         |          |          |          |          |              |             |           |          |          |
|---------------------------------------------------------|----------|----------|----------|----------|--------------|-------------|-----------|----------|----------|
| <b>C<sub>3</sub>H<sub>6</sub></b><br>(C <sub>s</sub> )  | C        | -1.22714 | 0.162147 | -4.2E-05 | -117.8852525 | 0.07783     | 206.8079  | 430.3893 | 595.9599 |
|                                                         | H        | -1.1646  | 1.249309 | -0.00011 |              |             | 938.2638  | 946.3078 | 965.7324 |
|                                                         | H        | -1.79703 | -0.15079 | 0.876426 |              |             | 1033.365  | 1079.366 | 1194.823 |
|                                                         | H        | -1.79704 | -0.15091 | -0.87646 |              |             | 1328.857  | 1406.705 | 1453.474 |
|                                                         | C        | 0.134514 | -0.4558  | -0.00001 |              |             | 1484.627  | 1497.022 | 1737.882 |
|                                                         | H        | 0.171068 | -1.54083 | 0.000026 |              |             | 3056.802  | 3110.993 | 3137.603 |
|                                                         | C        | 1.272229 | 0.221631 | 0.000043 |              |             | 3158.457  | 3167.008 | 3247.972 |
|                                                         | H        | 1.279843 | 1.305225 | 0.000059 |              |             |           |          |          |
|                                                         | H        | 2.230131 | -0.27988 | 0.000119 |              |             |           |          |          |
| <b>PC1</b><br>(C <sub>i</sub> )                         | C        | -3.38701 | 0.651619 | 0.937786 | -460.8254289 | 0.157938879 | 21.6393   | 48.644   | 54.6351  |
|                                                         | H        | -4.31535 | 1.21407  | 0.851008 |              |             | 65.7861   | 79.6755  | 107.0861 |
|                                                         | H        | -2.57693 | 1.364291 | 1.088046 |              |             | 134.2047  | 172.7706 | 177.2235 |
|                                                         | H        | -3.45875 | 0.022409 | 1.82634  |              |             | 244.9021  | 256.561  | 291.2837 |
|                                                         | C        | -3.14028 | -0.19393 | -0.30556 |              |             | 312.0437  | 345.0721 | 427.6181 |
|                                                         | H        | -3.97153 | -0.88315 | -0.45664 |              |             | 525.2307  | 583.6806 | 684.328  |
|                                                         | H        | -3.09027 | 0.447216 | -1.18574 |              |             | 719.3499  | 785.5626 | 846.1926 |
|                                                         | C        | -1.85581 | -1.00409 | -0.21212 |              |             | 890.8765  | 915.4044 | 921.3492 |
|                                                         | H        | -1.81299 | -1.58933 | 0.707908 |              |             | 931.4152  | 1055.22  | 1081.196 |
|                                                         | H        | -1.77379 | -1.7214  | -1.03242 |              |             | 1108.226  | 1138.965 | 1202.217 |
|                                                         | C        | -0.61939 | -0.14606 | -0.27901 |              |             | 1254.325  | 1302.812 | 1352.452 |
|                                                         | C        | 1.735939 | -0.28757 | 0.039241 |              |             | 1377.609  | 1406.129 | 1417.668 |
|                                                         | H        | 2.47129  | -1.02062 | 0.346604 |              |             | 1459.522  | 1489.858 | 1503.971 |
|                                                         | C        | 2.081397 | 0.92705  | -0.29241 |              |             | 1512.469  | 1621.492 | 1668.356 |
|                                                         | H        | 1.688024 | 1.866728 | -0.6232  |              |             | 1854.668  | 3062.591 | 3069.579 |
|                                                         | O        | 0.474531 | -0.86365 | 0.071894 |              |             | 3078.778  | 3107.021 | 3116.707 |
|                                                         | O        | -0.57625 | 1.002191 | -0.61454 |              |             | 3134.663  | 3145.047 | 3199.018 |
|                                                         | H        | 4.679395 | 0.10501  | -0.50834 |              |             | 3340.37   | 3851.261 | 3942.973 |
| O                                                       | 4.945961 | -0.13875 | 0.382215 |          |              |             |           |          |          |
| H                                                       | 4.517833 | 0.514321 | 0.942249 |          |              |             |           |          |          |
| <b>PC2</b>                                              | C        | 2.368234 | 0.823284 | -0.72627 | -460.832675  | 0.158586148 | 34.3203   | 52.9963  | 62.6965  |
|                                                         | H        | 2.468934 | -1.78928 | 0.786869 |              |             | 1490.712  | 1495.328 | 1726.113 |
|                                                         | O        | 0.297877 | -0.64536 | -0.03962 |              |             | 1805.795  | 3078.874 | 3085.328 |
|                                                         | O        | -0.8274  | 1.231483 | 0.44201  |              |             | 3167.61   | 3171.293 | 3173.441 |
|                                                         | O        | 1.730083 | 1.096106 | -0.62912 |              |             | 3226.541  | 3269.207 | 3823.876 |
|                                                         | H        | 1.067003 | 1.771644 | -0.44307 |              |             |           |          |          |
|                                                         | H        | 2.686781 | -1.28827 | -0.90351 |              |             |           |          |          |
| <b>H</b><br>(D <sub>∞h</sub> )                          | H        | 0        | 0        | 0        | -0.4982065   | 0           |           |          |          |
| <b>H<sub>2</sub>O</b><br>(C <sub>2v</sub> )             | O        | 0        | 0        | 0.116392 | -76.4301067  | 0.02093     | 1619.5383 | 3869.626 | 3972.571 |
|                                                         | H        | 0        | 0.762467 | -0.46557 |              |             |           |          |          |
|                                                         | H        | 0        | -0.76247 | -0.46557 |              |             |           |          |          |
| <b>CH<sub>3</sub></b><br>(D <sub>3h</sub> )             | C        | -3E-06   | 0.000018 | 0.000046 | -39.8253538  | 0.028859    | 432.1876  | 1411.548 | 1411.95  |
|                                                         | H        | 0.880838 | 0.617978 | -9.3E-05 |              |             | 3145.682  | 3322.149 | 3322.566 |
|                                                         | H        | -0.97567 | 0.453717 | -9.3E-05 |              |             |           |          |          |
|                                                         | H        | 0.09485  | -1.07181 | -9.3E-05 |              |             |           |          |          |
| <b>C<sub>2</sub>H<sub>4</sub></b><br>(D <sub>2h</sub> ) | C        | -0.66105 | -4E-06   | -7.6E-05 | -78.5728476  | 0.049824    | 825.6164  | 989.1604 | 1002.481 |
|                                                         | H        | -1.22751 | 0.921938 | -0.00003 |              |             | 1059.512  | 1241.551 | 1386.222 |
|                                                         | H        | -1.22755 | -0.92192 | -4.4E-05 |              |             | 1473.304  | 1714.294 | 3159.595 |
|                                                         | C        | 0.66105  | -4E-06   | 0.000033 |              |             | 3175.56   | 3234.758 | 3261.209 |
|                                                         | H        | 1.22756  | -0.92191 | 0.000173 |              |             |           |          |          |

|                                                        |          |          |          |          |              |             |          |          |          |
|--------------------------------------------------------|----------|----------|----------|----------|--------------|-------------|----------|----------|----------|
|                                                        | H        | 1.227515 | 0.921934 | 0.000158 |              |             |          |          |          |
| <b>C<sub>3</sub>H<sub>6</sub></b><br>(C <sub>s</sub> ) | C        | -1.22714 | 0.162147 | -4.2E-05 | -117.8852525 | 0.07783     | 206.8079 | 430.3893 | 595.9599 |
|                                                        | H        | -1.1646  | 1.249309 | -0.00011 |              |             | 938.2638 | 946.3078 | 965.7324 |
|                                                        | H        | -1.79703 | -0.15079 | 0.876426 |              |             | 1033.365 | 1079.366 | 1194.823 |
|                                                        | H        | -1.79704 | -0.15091 | -0.87646 |              |             | 1328.857 | 1406.705 | 1453.474 |
|                                                        | C        | 0.134514 | -0.4558  | -0.00001 |              |             | 1484.627 | 1497.022 | 1737.882 |
|                                                        | H        | 0.171068 | -1.54083 | 0.000026 |              |             | 3056.802 | 3110.993 | 3137.603 |
|                                                        | C        | 1.272229 | 0.221631 | 0.000043 |              |             | 3158.457 | 3167.008 | 3247.972 |
|                                                        | H        | 1.279843 | 1.305225 | 0.000059 |              |             |          |          |          |
|                                                        | H        | 2.230131 | -0.27988 | 0.000119 |              |             |          |          |          |
| <b>PC1</b><br>(C <sub>i</sub> )                        | C        | -3.38701 | 0.651619 | 0.937786 | -460.8254289 | 0.157938879 | 21.6393  | 48.644   | 54.6351  |
|                                                        | H        | -4.31535 | 1.21407  | 0.851008 |              |             | 65.7861  | 79.6755  | 107.0861 |
|                                                        | H        | -2.57693 | 1.364291 | 1.088046 |              |             | 134.2047 | 172.7706 | 177.2235 |
|                                                        | H        | -3.45875 | 0.022409 | 1.82634  |              |             | 244.9021 | 256.561  | 291.2837 |
|                                                        | C        | -3.14028 | -0.19393 | -0.30556 |              |             | 312.0437 | 345.0721 | 427.6181 |
|                                                        | H        | -3.97153 | -0.88315 | -0.45664 |              |             | 525.2307 | 583.6806 | 684.328  |
|                                                        | H        | -3.09027 | 0.447216 | -1.18574 |              |             | 719.3499 | 785.5626 | 846.1926 |
|                                                        | C        | -1.85581 | -1.00409 | -0.21212 |              |             | 890.8765 | 915.4044 | 921.3492 |
|                                                        | H        | -1.81299 | -1.58933 | 0.707908 |              |             | 931.4152 | 1055.22  | 1081.196 |
|                                                        | H        | -1.77379 | -1.7214  | -1.03242 |              |             | 1108.226 | 1138.965 | 1202.217 |
|                                                        | C        | -0.61939 | -0.14606 | -0.27901 |              |             | 1254.325 | 1302.812 | 1352.452 |
|                                                        | C        | 1.735939 | -0.28757 | 0.039241 |              |             | 1377.609 | 1406.129 | 1417.668 |
|                                                        | H        | 2.47129  | -1.02062 | 0.346604 |              |             | 1459.522 | 1489.858 | 1503.971 |
|                                                        | C        | 2.081397 | 0.92705  | -0.29241 |              |             | 1512.469 | 1621.492 | 1668.356 |
|                                                        | H        | 1.688024 | 1.866728 | -0.6232  |              |             | 1854.668 | 3062.591 | 3069.579 |
|                                                        | O        | 0.474531 | -0.86365 | 0.071894 |              |             | 3078.778 | 3107.021 | 3116.707 |
|                                                        | O        | -0.57625 | 1.002191 | -0.61454 |              |             | 3134.663 | 3145.047 | 3199.018 |
| H                                                      | 4.679395 | 0.10501  | -0.50834 | 3340.37  | 3851.261     | 3942.973    |          |          |          |
| O                                                      | 4.945961 | -0.13875 | 0.382215 |          |              |             |          |          |          |
| H                                                      | 4.517833 | 0.514321 | 0.942249 |          |              |             |          |          |          |
| <b>PC2</b><br>(C <sub>i</sub> )                        | C        | 2.368234 | 0.823284 | -0.72627 | -460.832675  | 0.158586148 | 34.3203  | 52.9963  | 62.6965  |
|                                                        | H        | 2.905112 | 1.138707 | -1.61943 |              |             | 87.0121  | 94.099   | 133.6984 |
|                                                        | H        | 2.944183 | 1.142561 | 0.143517 |              |             | 141.6519 | 178.8699 | 183.451  |
|                                                        | H        | 1.4146   | 1.354244 | -0.70644 |              |             | 221.4845 | 253.1799 | 286.4403 |
|                                                        | C        | 2.17023  | -0.68713 | -0.71899 |              |             | 382.2613 | 421.6183 | 439.4148 |
|                                                        | H        | 1.578455 | -0.99451 | -1.58128 |              |             | 471.822  | 611.8872 | 645.2601 |
|                                                        | H        | 3.130609 | -1.1975  | -0.79369 |              |             | 706.6852 | 815.9706 | 854.0183 |
|                                                        | C        | 1.480254 | -1.177   | 0.560629 |              |             | 875.1355 | 890.9349 | 919.9414 |
|                                                        | H        | 1.324539 | -2.25563 | 0.517399 |              |             | 997.2357 | 1056.15  | 1096.444 |
|                                                        | H        | 2.075749 | -0.93915 | 1.4394   |              |             | 1111.385 | 1161.806 | 1211.277 |
|                                                        | C        | 0.148992 | -0.51821 | 0.747548 |              |             | 1274.823 | 1285.547 | 1363.549 |
|                                                        | C        | -1.93051 | -0.31848 | -0.2795  |              |             | 1380.524 | 1405.754 | 1429.773 |
|                                                        | C        | -3.07709 | -0.82704 | -0.64825 |              |             | 1477.605 | 1497.218 | 1507.62  |
|                                                        | H        | -3.96541 | -0.21481 | -0.66717 |              |             | 1513.989 | 1627.14  | 1747.804 |
|                                                        | H        | -3.15347 | -1.87175 | -0.93213 |              |             | 1868.037 | 3056.685 | 3079.063 |
|                                                        | O        | -0.70868 | -0.8661  | -0.27098 |              |             | 3088.7   | 3109.871 | 3131.292 |
|                                                        | O        | -0.17403 | 0.227502 | 1.622838 |              |             | 3139.488 | 3142.873 | 3152.156 |
|                                                        | H        | -1.59351 | 2.459791 | -0.45744 |              |             | 3260.901 | 3817.411 | 3933.329 |
|                                                        | O        | -0.72815 | 2.585563 | -0.06185 |              |             |          |          |          |
| H                                                      | -0.73467 | 2.029753 | 0.726168 |          |              |             |          |          |          |

|                                 |          |          |          |          |              |             |          |          |          |
|---------------------------------|----------|----------|----------|----------|--------------|-------------|----------|----------|----------|
| <b>PC3</b><br>(C <sub>i</sub> ) | C        | 2.248385 | 1.166686 | -0.43345 | -460.8281392 | 0.158509244 | 36.3306  | 38.4352  | 75.6103  |
|                                 | H        | 2.845986 | 1.629613 | -1.21727 |              |             | 96.0284  | 110.6761 | 151.1311 |
|                                 | H        | 2.621858 | 1.521957 | 0.5281   |              |             | 162.9958 | 172.2415 | 206.7851 |
|                                 | H        | 1.222898 | 1.524789 | -0.54051 |              |             | 218.6871 | 243.8504 | 278.4515 |
|                                 | C        | 2.327752 | -0.35226 | -0.51518 |              |             | 378.662  | 425.9031 | 459.9168 |
|                                 | H        | 1.951573 | -0.70011 | -1.47747 |              |             | 482.1106 | 640.2314 | 694.5768 |
|                                 | H        | 3.364628 | -0.68147 | -0.44214 |              |             | 719.1371 | 794.2355 | 857.0398 |
|                                 | C        | 1.538802 | -1.03666 | 0.606387 |              |             | 873.6285 | 875.4845 | 895.2416 |
|                                 | H        | 1.619058 | -2.12079 | 0.516696 |              |             | 927.2262 | 1047.896 | 1100.723 |
|                                 | H        | 1.912192 | -0.73468 | 1.582711 |              |             | 1110.662 | 1156.649 | 1220.834 |
|                                 | C        | 0.081183 | -0.67616 | 0.56751  |              |             | 1275.831 | 1285.562 | 1340.636 |
|                                 | C        | -1.83859 | -0.93247 | -0.80723 |              |             | 1365.321 | 1383.251 | 1429.238 |
|                                 | H        | -2.10571 | -1.37581 | -1.76047 |              |             | 1477.272 | 1497.128 | 1507.888 |
|                                 | C        | -2.70729 | -0.34168 | -0.03103 |              |             | 1513.724 | 1632.374 | 1685.82  |
|                                 | H        | -3.76586 | -0.17284 | -0.11398 |              |             | 1844.348 | 3056.957 | 3076.128 |
|                                 | O        | -0.49077 | -1.11385 | -0.58225 |              |             | 3086.521 | 3107.576 | 3130.044 |
|                                 | O        | -0.52249 | -0.07899 | 1.414286 |              |             | 3138.147 | 3149.19  | 3167.897 |
|                                 | H        | -1.76357 | 2.114394 | -0.59675 |              |             | 3296.15  | 3827.29  | 3929.832 |
| O                               | -1.08264 | 2.467984 | -0.01975 |          |              |             |          |          |          |
| H                               | -1.03732 | 1.829082 | 0.700789 |          |              |             |          |          |          |
| <b>PC4</b><br>(C <sub>i</sub> ) | C        | -2.54041 | -1.0533  | 0.880468 | -460.8656893 | 0.159033196 | 37.3207  | 59.1989  | 64.7547  |
|                                 | H        | -3.61403 | -0.90202 | 0.788935 |              |             | 91.8462  | 93.5058  | 109.1409 |
|                                 | H        | -2.13159 | -0.20787 | 1.430595 |              |             | 146.7354 | 158.468  | 190.8812 |
|                                 | H        | -2.35748 | -1.96693 | 1.445388 |              |             | 237.3618 | 310.2623 | 345.0848 |
|                                 | C        | -1.90546 | -1.13467 | -0.52006 |              |             | 357.4302 | 435.5938 | 491.392  |
|                                 | H        | -2.33375 | -1.9723  | -1.06899 |              |             | 547.8956 | 587.8012 | 701.4053 |
|                                 | H        | -2.14556 | -0.21517 | -1.05547 |              |             | 728.7481 | 766.2424 | 817.6862 |
|                                 | C        | -0.43764 | -1.29832 | -0.4322  |              |             | 908.724  | 921.8674 | 924.6838 |
|                                 | H        | 0.033175 | -2.2693  | -0.47738 |              |             | 1010.143 | 1011.084 | 1048.91  |
|                                 | C        | 0.414793 | -0.16422 | -0.18926 |              |             | 1115.322 | 1144.794 | 1193.657 |
|                                 | C        | 2.655313 | 0.4565   | 0.131681 |              |             | 1238.065 | 1291.966 | 1324.275 |
|                                 | H        | 2.250837 | 1.452908 | 0.224929 |              |             | 1329.541 | 1401.834 | 1424.372 |
|                                 | C        | 3.933873 | 0.143311 | 0.222533 |              |             | 1468.917 | 1488.901 | 1496.144 |
|                                 | H        | 4.658148 | 0.921279 | 0.403975 |              |             | 1512.795 | 1640.572 | 1740.152 |
|                                 | H        | 4.273022 | -0.87714 | 0.119154 |              |             | 1744.054 | 3070.444 | 3080.214 |
|                                 | O        | 1.722033 | -0.52571 | -0.09891 |              |             | 3124.621 | 3148.963 | 3158.882 |
|                                 | O        | 0.043645 | 0.987257 | -0.07505 |              |             | 3194.644 | 3226.874 | 3249.322 |
|                                 | H        | -2.67208 | 2.949003 | -0.13999 |              |             | 3293.244 | 3744.996 | 3940.656 |
| O                               | -2.63879 | 1.992192 | -0.09554 |          |              |             |          |          |          |
| H                               | -1.69871 | 1.761851 | -0.07415 |          |              |             |          |          |          |
| <b>PC5</b><br>(C <sub>i</sub> ) | C        | -2.17475 | 1.393455 | -0.91421 | -460.8552332 | 0.157792258 | 34.4863  | 50.6864  | 72.6735  |
|                                 | H        | -1.73875 | 0.761366 | -1.69977 |              |             | 81.5426  | 93.6996  | 119.2807 |
|                                 | H        | -2.56007 | 2.291217 | -1.39384 |              |             | 126.7413 | 144.8609 | 150.3049 |
|                                 | H        | -3.00478 | 0.818401 | -0.49927 |              |             | 211.2968 | 245.8552 | 352.6527 |
|                                 | C        | -1.17887 | 1.722418 | 0.135566 |              |             | 382.4163 | 420.2405 | 447.7823 |
|                                 | H        | -0.59703 | 2.630455 | 0.069167 |              |             | 471.6054 | 545.1468 | 646.9896 |
|                                 | C        | -0.70445 | 0.654078 | 1.071789 |              |             | 733.2393 | 785.8412 | 872.1926 |
|                                 | H        | -0.19431 | 1.077933 | 1.933828 |              |             | 904.8779 | 929.9442 | 934.1977 |
|                                 | H        | -1.53883 | 0.027068 | 1.38869  |              |             | 998.1422 | 1012.536 | 1021.148 |
|                                 | C        | 0.255592 | -0.22531 | 0.311367 |              |             | 1100.858 | 1150.454 | 1184.285 |

|                                 |          |          |          |          |              |             |          |          |          |
|---------------------------------|----------|----------|----------|----------|--------------|-------------|----------|----------|----------|
|                                 | C        | 2.50563  | -0.41394 | -0.32474 |              |             | 1228.293 | 1289.043 | 1314.796 |
|                                 | H        | 2.155752 | -1.23806 | -0.92752 |              |             | 1334.762 | 1386.656 | 1423.657 |
|                                 | C        | 3.755529 | -0.00381 | -0.24205 |              |             | 1426.727 | 1470.619 | 1479.506 |
|                                 | H        | 4.518258 | -0.51002 | -0.81208 |              |             | 1485.254 | 1638.829 | 1743.886 |
|                                 | H        | 4.034534 | 0.830394 | 0.385126 |              |             | 1815.045 | 2997.63  | 3081.564 |
|                                 | O        | 1.523181 | 0.229682 | 0.399469 |              |             | 3082.985 | 3141.994 | 3149.835 |
|                                 | O        | -0.05471 | -1.17907 | -0.35688 |              |             | 3193.847 | 3207.295 | 3247.44  |
|                                 | H        | -3.10646 | -2.60845 | 0.073562 |              |             | 3291.866 | 3736.1   | 3937.813 |
|                                 | O        | -2.82108 | -1.69536 | 0.134737 |              |             |          |          |          |
|                                 | H        | -1.89953 | -1.68368 | -0.16277 |              |             |          |          |          |
| <b>PC6</b><br>(C <sub>i</sub> ) | C        | -1.58801 | 1.474821 | 1.152437 | -460.8508071 | 0.157771576 | 32.9379  | 68.5971  | 76.9467  |
|                                 | H        | -1.40493 | 2.082896 | 2.024445 |              |             | 88.246   | 100.1468 | 135.1902 |
|                                 | H        | -2.31867 | 0.680363 | 1.213365 |              |             | 142.5413 | 151.4874 | 182.2302 |
|                                 | C        | -1.02673 | 1.859451 | -0.1692  |              |             | 207.162  | 275.3022 | 369.3977 |
|                                 | H        | -1.70843 | 2.535236 | -0.70056 |              |             | 405.3752 | 435.3616 | 472.8456 |
|                                 | H        | -0.08964 | 2.404275 | -0.04791 |              |             | 512.3899 | 548.0175 | 632.917  |
|                                 | C        | -0.79902 | 0.637979 | -1.07429 |              |             | 702.4288 | 738.2513 | 870.2051 |
|                                 | H        | -1.73696 | 0.114161 | -1.24612 |              |             | 887.0871 | 909.9617 | 928.0905 |
|                                 | H        | -0.37482 | 0.951617 | -2.02805 |              |             | 929.7637 | 1013.589 | 1031.337 |
|                                 | C        | 0.150468 | -0.32534 | -0.42492 |              |             | 1094.015 | 1106.984 | 1186.507 |
|                                 | C        | 2.379591 | -0.53808 | 0.279478 |              |             | 1199.131 | 1229.669 | 1310.322 |
|                                 | H        | 2.044293 | -1.47041 | 0.707479 |              |             | 1330.836 | 1366.912 | 1379.326 |
|                                 | C        | 3.613832 | -0.07743 | 0.323119 |              |             | 1426.987 | 1470.502 | 1475.678 |
|                                 | H        | 4.376877 | -0.65254 | 0.823015 |              |             | 1489.208 | 1636.918 | 1744.603 |
|                                 | H        | 3.879623 | 0.866222 | -0.13075 |              |             | 1830.933 | 3004.223 | 3091.085 |
|                                 | O        | 1.395257 | 0.194238 | -0.35048 |              |             | 3095.355 | 3155.975 | 3164.582 |
| O                               | -0.12711 | -1.4162  | 0.001963 |          |              | 3194.266    | 3249.846 | 3274.927 |          |
| H                               | -3.41487 | -2.3096  | 0.365834 |          |              | 3292.327    | 3734.255 | 3938.866 |          |
| O                               | -2.96966 | -1.49113 | 0.140816 |          |              |             |          |          |          |
| H                               | -2.02117 | -1.68591 | 0.161086 |          |              |             |          |          |          |

| P5 + O <sub>2</sub> channels               |                          |           |           |           |                                                                                                |                  |                                                         |          |          |
|--------------------------------------------|--------------------------|-----------|-----------|-----------|------------------------------------------------------------------------------------------------|------------------|---------------------------------------------------------|----------|----------|
| Species                                    | Cartesian coordinate (Å) |           |           |           | <br>(Hartree) | ZPE<br>(Hartree) | Unscaled vibrational<br>frequencies (cm <sup>-1</sup> ) |          |          |
| <b>P5</b><br>(C <sub>i</sub> )             | C                        | 3.662812  | -0.446087 | -0.021218 | -384.413816                                                                                    | 0.133056         | 35.8639                                                 | 61.1642  | 83.2738  |
|                                            | H                        | 3.837589  | -0.969723 | 0.92725   |                                                                                                |                  | 110.5803                                                | 125.7683 | 140.2168 |
|                                            | H                        | 4.494561  | 0.237152  | -0.176611 |                                                                                                |                  | 260.8614                                                | 299.7883 | 343.0207 |
|                                            | H                        | 3.701654  | -1.211951 | -0.802397 |                                                                                                |                  | 412.4441                                                | 472.3048 | 567.4644 |
|                                            | C                        | 2.359746  | 0.263579  | -0.022834 |                                                                                                |                  | 734.3549                                                | 735.6015 | 903.9821 |
|                                            | H                        | 2.300676  | 1.337444  | 0.055175  |                                                                                                |                  | 910.4407                                                | 925.6689 | 928.9054 |
|                                            | C                        | 1.102265  | -0.518737 | 0.032349  |                                                                                                |                  | 995.5143                                                | 1017.472 | 1021.669 |
|                                            | H                        | 1.028103  | -1.23529  | -0.794747 |                                                                                                |                  | 1112.953                                                | 1164.403 | 1187.659 |
|                                            | H                        | 1.043107  | -1.143313 | 0.935024  |                                                                                                |                  | 1198.763                                                | 1220.525 | 1321.169 |
|                                            | C                        | -0.141276 | 0.328419  | 0.008609  |                                                                                                |                  | 1334.189                                                | 1409.921 | 1425.94  |
|                                            | C                        | -2.480661 | 0.142499  | -0.007542 |                                                                                                |                  | 1439.241                                                | 1446.781 | 1478.986 |
|                                            | H                        | -2.452846 | 1.2218    | -0.01128  |                                                                                                |                  | 1489.239                                                | 1743.664 | 1867.109 |
|                                            | C                        | -3.576547 | -0.590872 | -0.012678 |                                                                                                |                  | 2998.195                                                | 3003.059 | 3030.753 |
|                                            | H                        | -4.539301 | -0.105158 | -0.021124 |                                                                                                |                  | 3049.465                                                | 3143.315 | 3193.977 |
|                                            | H                        | -3.53268  | -1.670317 | -0.008694 |                                                                                                |                  | 3239.813                                                | 3245.505 | 3291.894 |
|                                            | O                        | -1.244556 | -0.464614 | 0.003341  |                                                                                                |                  |                                                         |          |          |
| O                                          | -0.185307                | 1.522934  | 0.00132   |           |                                                                                                |                  |                                                         |          |          |
| <b>O<sub>2</sub></b><br>(D <sub>∞h</sub> ) | O                        | 0         | 0         | 0.594893  | -150.324815                                                                                    | 0.00389          | 1758.343                                                |          |          |
|                                            | O                        | 0         | 0         | -0.594893 |                                                                                                |                  |                                                         |          |          |
| <b>IM7</b><br>(C <sub>i</sub> )            | C                        | 3.035313  | -0.949939 | -0.548382 | -534.798878                                                                                    | 0.144343         | 28.5235                                                 | 56.6011  | 81.2232  |
|                                            | H                        | 2.945785  | -2.016205 | -0.751345 |                                                                                                |                  | 116.3817                                                | 130.4796 | 158.7725 |
|                                            | H                        | 3.942357  | -0.780715 | 0.028575  |                                                                                                |                  | 225.6783                                                | 243.3031 | 300.3351 |
|                                            | H                        | 3.113725  | -0.415778 | -1.493692 |                                                                                                |                  | 327.9461                                                | 390.2289 | 438.0228 |
|                                            | C                        | 1.824618  | -0.475237 | 0.224241  |                                                                                                |                  | 486.0032                                                | 557.5284 | 640.8856 |
|                                            | H                        | 1.732887  | -0.976926 | 1.18551   |                                                                                                |                  | 735.1964                                                | 744.6401 | 835.3032 |
|                                            | C                        | 0.533688  | -0.596377 | -0.557005 |                                                                                                |                  | 907.174                                                 | 920.7876 | 930.1354 |
|                                            | H                        | 0.53479   | 0.090866  | -1.401908 |                                                                                                |                  | 946.1844                                                | 1014.661 | 1022.506 |
|                                            | H                        | 0.444966  | -1.605264 | -0.965751 |                                                                                                |                  | 1069.78                                                 | 1131.558 | 1156.149 |
|                                            | C                        | -0.68124  | -0.350898 | 0.299363  |                                                                                                |                  | 1186.1                                                  | 1225.793 | 1245.534 |
|                                            | C                        | -2.979422 | 0.083095  | 0.148338  |                                                                                                |                  | 1272.58                                                 | 1328.765 | 1338.788 |
|                                            | H                        | -2.938736 | 0.070319  | 1.226963  |                                                                                                |                  | 1400.54                                                 | 1415.309 | 1422.473 |
|                                            | C                        | -4.063903 | 0.279849  | -0.574199 |                                                                                                |                  | 1431.853                                                | 1449.569 | 1489.568 |
|                                            | H                        | -5.007457 | 0.445501  | -0.079073 |                                                                                                |                  | 1506.61                                                 | 1744.83  | 1864.118 |
|                                            | H                        | -4.029387 | 0.281676  | -1.653964 |                                                                                                |                  | 3077.295                                                | 3086.488 | 3130.945 |
|                                            | O                        | -1.766185 | -0.125396 | -0.475914 |                                                                                                |                  | 3143.49                                                 | 3155.443 | 3162.23  |
|                                            | O                        | -0.704597 | -0.37846  | 1.494896  |                                                                                                |                  | 3194.795                                                | 3248.057 | 3293.153 |
|                                            | O                        | 2.014759  | 0.916722  | 0.623548  |                                                                                                |                  |                                                         |          |          |
| O                                          | 2.111866                 | 1.70758   | -0.398712 |           |                                                                                                |                  |                                                         |          |          |
| <b>IM8</b><br>(C <sub>i</sub> )            | C                        | -2.227801 | -0.954967 | -0.675486 | -534.786984                                                                                    | 0.144786         | 87.7288                                                 | 100.8959 | 113.5972 |
|                                            | H                        | -3.251986 | -0.683634 | -0.422449 |                                                                                                |                  | 132.3436                                                | 212.385  | 240.3897 |
|                                            | H                        | -2.211942 | -1.987023 | -1.020572 |                                                                                                |                  | 290.4662                                                | 355.8236 | 368.4426 |
|                                            | H                        | -1.889856 | -0.308167 | -1.482839 |                                                                                                |                  | 418.3255                                                | 440.5098 | 480.4973 |
|                                            | C                        | -1.346311 | -0.80633  | 0.550633  |                                                                                                |                  | 517.7416                                                | 609.3366 | 660.5732 |
|                                            | H                        | -1.761304 | -1.380463 | 1.37988   |                                                                                                |                  | 733.0088                                                | 760.0961 | 838.028  |

|                                  |   |           |           |           |             |          |           |          |          |
|----------------------------------|---|-----------|-----------|-----------|-------------|----------|-----------|----------|----------|
|                                  | C | -1.201235 | 0.659773  | 0.999953  |             |          | 880.1049  | 911.5786 | 933.0748 |
|                                  | H | -2.165319 | 1.159298  | 0.939831  |             |          | 945.157   | 971.1189 | 1011.132 |
|                                  | H | -0.826823 | 0.690224  | 2.021926  |             |          | 1046.032  | 1120.211 | 1132.737 |
|                                  | C | -0.2117   | 1.381051  | 0.125185  |             |          | 1158.505  | 1161.039 | 1198.046 |
|                                  | C | 1.569909  | -0.022691 | -0.434446 |             |          | 1256.891  | 1305.058 | 1349.566 |
|                                  | H | 1.845901  | 0.393303  | -1.409644 |             |          | 1369.187  | 1373.641 | 1389.475 |
|                                  | C | 2.693288  | -0.704129 | 0.238458  |             |          | 1419.839  | 1458.276 | 1476.195 |
|                                  | H | 2.835356  | -0.58531  | 1.299071  |             |          | 1493.198  | 1502.541 | 1897.402 |
|                                  | H | 3.287372  | -1.406287 | -0.323026 |             |          | 3051.861  | 3076.593 | 3094.149 |
|                                  | O | 1.082357  | 0.989835  | 0.417333  |             |          | 3104.491  | 3150.768 | 3161.886 |
|                                  | O | -0.455596 | 2.187203  | -0.713713 |             |          | 3164.38   | 3196.482 | 3315.228 |
|                                  | O | -0.075225 | -1.435092 | 0.376493  |             |          |           |          |          |
|                                  | O | 0.508676  | -0.892967 | -0.806108 |             |          |           |          |          |
| <b>IM9</b><br>(C <sub>i</sub> )  | C | 2.881237  | 0.143977  | 0.358195  | -534.794962 | 0.146933 | 88.9935   | 125.6242 | 158.2156 |
|                                  | H | 3.307229  | 1.145156  | 0.329556  |             |          | 215.8003  | 246.6757 | 247.8533 |
|                                  | H | 3.518119  | -0.526603 | -0.214407 |             |          | 322.009   | 326.4656 | 435.9672 |
|                                  | H | 2.855867  | -0.196081 | 1.39347   |             |          | 452.5931  | 469.6038 | 485.8641 |
|                                  | C | 1.48233   | 0.160788  | -0.224129 |             |          | 543.0035  | 593.9686 | 680.657  |
|                                  | H | 1.499665  | 0.489729  | -1.266154 |             |          | 778.5644  | 869.9375 | 877.7061 |
|                                  | C | 0.551394  | 1.068634  | 0.58115   |             |          | 922.875   | 930.6687 | 957.0054 |
|                                  | H | 0.458324  | 0.672548  | 1.592288  |             |          | 976.0253  | 1045.33  | 1075.506 |
|                                  | H | 1.001058  | 2.059516  | 0.619973  |             |          | 1124.202  | 1138.369 | 1156.325 |
|                                  | C | -0.808066 | 1.274404  | -0.048301 |             |          | 1199.988  | 1246.706 | 1276.428 |
|                                  | C | -1.5831   | -0.751496 | 0.902814  |             |          | 1298.342  | 1315.225 | 1378.804 |
|                                  | H | -2.175085 | -1.03234  | 1.761119  |             |          | 1383.178  | 1393.742 | 1409.033 |
|                                  | C | -1.164678 | -1.757982 | -0.108865 |             |          | 1415.662  | 1460.442 | 1467.871 |
|                                  | H | -0.858021 | -2.687536 | 0.373666  |             |          | 1490.39   | 1504.031 | 1889.199 |
|                                  | H | -1.980161 | -1.973339 | -0.809608 |             |          | 3029.566  | 3069.016 | 3074.792 |
|                                  | O | -1.838297 | 0.506561  | 0.440296  |             |          | 3091.177  | 3102.447 | 3146.52  |
|                                  | O | -1.043484 | 2.109433  | -0.863015 |             |          | 3152.515  | 3162.14  | 3222.855 |
|                                  | O | 1.052831  | -1.192044 | -0.188688 |             |          |           |          |          |
|                                  | O | -0.143763 | -1.271574 | -0.956729 |             |          |           |          |          |
| <b>TS18</b><br>(C <sub>i</sub> ) | C | -2.803335 | -1.544123 | -0.192491 | -534.749924 | 0.139164 | -964.5533 | 43.8862  | 83.6045  |
|                                  | H | -2.871548 | -1.490514 | -1.2779   |             |          | 91.8087   | 124.0163 | 148.2411 |
|                                  | H | -3.765349 | -1.278622 | 0.24114   |             |          | 165.5853  | 212.6794 | 241.6301 |
|                                  | H | -2.58115  | -2.576086 | 0.086188  |             |          | 277.5604  | 375.9208 | 414.2284 |
|                                  | C | -1.716362 | -0.662509 | 0.323042  |             |          | 463.2506  | 502.6302 | 620.1721 |
|                                  | H | -1.658508 | -0.527397 | 1.397047  |             |          | 648.8989  | 722.3156 | 743.4533 |
|                                  | C | -0.543155 | -0.424265 | -0.39981  |             |          | 774.9444  | 910.6741 | 922.7077 |
|                                  | H | -0.400878 | -0.905465 | -1.359084 |             |          | 934.6859  | 938.5458 | 1012.739 |
|                                  | H | -0.988567 | 0.883251  | -0.760697 |             |          | 1017.381  | 1061.692 | 1118.106 |
|                                  | C | 0.671339  | -0.09329  | 0.36143   |             |          | 1149.623  | 1185.556 | 1214.585 |
|                                  | C | 3.000791  | 0.059976  | 0.1457    |             |          | 1230.265  | 1281.142 | 1326.176 |
|                                  | H | 2.955213  | 0.409052  | 1.166348  |             |          | 1367.361  | 1398.408 | 1415.142 |
|                                  | C | 4.104762  | -0.084684 | -0.561332 |             |          | 1426.94   | 1478.295 | 1490.232 |
|                                  | H | 5.055758  | 0.157794  | -0.114499 |             |          | 1556.89   | 1725.974 | 1743.83  |
|                                  | H | 4.078851  | -0.44065  | -1.581015 |             |          | 1833.615  | 3064.769 | 3131.315 |
|                                  | O | 1.779795  | -0.24279  | -0.412551 |             |          | 3155.694  | 3190.227 | 3194.649 |
|                                  | O | 0.705622  | 0.283726  | 1.501581  |             |          | 3197.905  | 3246.408 | 3292.339 |

|                                  |           |           |           |           |             |          |           |          |          |
|----------------------------------|-----------|-----------|-----------|-----------|-------------|----------|-----------|----------|----------|
|                                  | O         | -1.858801 | 1.704116  | -0.651376 |             |          |           |          |          |
|                                  | O         | -2.640124 | 1.0377    | 0.08025   |             |          |           |          |          |
| <b>TS19</b><br>(C <sub>i</sub> ) | C         | 2.980997  | -0.834192 | -0.498831 | -534.741053 | 0.138941 | -1097.961 | 23.154   | 69.4138  |
|                                  | H         | 3.869175  | -1.12695  | 0.046133  |             |          | 81.1482   | 115.2823 | 138.4413 |
|                                  | H         | 3.080007  | 0.523199  | -0.499231 |             |          | 159.0483  | 217.4298 | 304.2794 |
|                                  | H         | 2.980478  | -1.06381  | -1.558737 |             |          | 352.8278  | 425.3144 | 455.7016 |
|                                  | C         | 1.770783  | -0.808252 | 0.173179  |             |          | 482.0355  | 549.0908 | 571.5962 |
|                                  | H         | 1.7344    | -0.941652 | 1.246298  |             |          | 639.905   | 679.8452 | 736.4611 |
|                                  | C         | 0.465514  | -0.961613 | -0.53622  |             |          | 756.4661  | 907.8917 | 917.67   |
|                                  | H         | 0.464459  | -0.43559  | -1.489727 |             |          | 930.4428  | 938.3998 | 1004.527 |
|                                  | H         | 0.297754  | -2.021084 | -0.759624 |             |          | 1014.114  | 1025.533 | 1067.323 |
|                                  | C         | -0.703368 | -0.513313 | 0.303891  |             |          | 1146.481  | 1183.535 | 1218.186 |
|                                  | C         | -2.921215 | 0.220303  | 0.131959  |             |          | 1237.905  | 1281.513 | 1302.17  |
|                                  | H         | -2.873989 | 0.256042  | 1.209768  |             |          | 1330.472  | 1367.832 | 1405.529 |
|                                  | C         | -3.976251 | 0.520612  | -0.598509 |             |          | 1427.149  | 1444.947 | 1457.889 |
|                                  | H         | -4.886248 | 0.832943  | -0.111441 |             |          | 1591.613  | 1654.38  | 1745.035 |
|                                  | H         | -3.950164 | 0.463808  | -1.677015 |             |          | 1867.834  | 3050.248 | 3130.018 |
|                                  | O         | -1.749923 | -0.174569 | -0.482314 |             |          | 3140.475  | 3194.253 | 3209.698 |
|                                  | O         | -0.72611  | -0.496167 | 1.498883  |             |          | 3231.148  | 3248.453 | 3292.074 |
| O                                | 1.570875  | 1.241834  | 0.395473  |           |             |          |           |          |          |
| O                                | 2.603328  | 1.650379  | -0.194445 |           |             |          |           |          |          |
| <b>TS20</b><br>(C <sub>i</sub> ) | C         | -2.273926 | -0.704262 | -0.784871 | -534.75804  | 0.143814 | -765.2694 | 86.5894  | 121.3711 |
|                                  | H         | -3.266691 | -0.275382 | -0.653871 |             |          | 160.7353  | 199.1706 | 233.087  |
|                                  | H         | -2.375858 | -1.742225 | -1.095618 |             |          | 257.635   | 317.9285 | 354.6793 |
|                                  | H         | -1.757877 | -0.15334  | -1.568401 |             |          | 393.2596  | 434.0209 | 442.9593 |
|                                  | C         | -1.516166 | -0.633117 | 0.526145  |             |          | 486.2074  | 562.9397 | 616.4428 |
|                                  | H         | -2.093849 | -1.108788 | 1.318796  |             |          | 673.947   | 782.7692 | 808.2529 |
|                                  | C         | -1.220862 | 0.817238  | 0.964552  |             |          | 823.5224  | 870.1765 | 909.7557 |
|                                  | H         | -2.107935 | 1.431256  | 0.826991  |             |          | 933.6263  | 958.1963 | 998.5668 |
|                                  | H         | -0.907063 | 0.826852  | 2.006072  |             |          | 1040.767  | 1072.747 | 1114.251 |
|                                  | C         | -0.106215 | 1.33831   | 0.114734  |             |          | 1142.854  | 1204.973 | 1207.59  |
|                                  | C         | 1.761528  | 0.082216  | -0.344862 |             |          | 1248.549  | 1273.609 | 1293.826 |
|                                  | H         | 1.68074   | 0.412585  | -1.371497 |             |          | 1370.51   | 1384.187 | 1419.97  |
|                                  | C         | 2.801546  | -0.690021 | 0.098852  |             |          | 1421.589  | 1476.545 | 1491.514 |
|                                  | H         | 3.405351  | -1.225933 | -0.614462 |             |          | 1502.519  | 1529.795 | 1900.482 |
|                                  | H         | 2.946493  | -0.854533 | 1.155261  |             |          | 3077.224  | 3096.593 | 3108.712 |
|                                  | O         | 1.101768  | 0.84311   | 0.575021  |             |          | 3151.989  | 3162.684 | 3169.015 |
|                                  | O         | -0.186809 | 2.015329  | -0.858989 |             |          | 3195.952  | 3212.851 | 3307.155 |
| O                                | -0.327231 | -1.43848  | 0.502646  |           |             |          |           |          |          |
| O                                | 0.387428  | -1.241544 | -0.649999 |           |             |          |           |          |          |
| <b>TS21</b><br>(C <sub>i</sub> ) | C         | -1.693106 | -1.492731 | -0.608629 | -534.756347 | 0.144292 | -225.9631 | 51.0166  | 133.6073 |
|                                  | H         | -2.725984 | -1.329623 | -0.304621 |             |          | 155.2755  | 189.0546 | 221.2772 |
|                                  | H         | -1.576672 | -2.521809 | -0.942856 |             |          | 262.0002  | 282.898  | 315.6385 |
|                                  | H         | -1.483164 | -0.820738 | -1.437993 |             |          | 391.3197  | 445.1871 | 495.627  |
|                                  | C         | -0.776091 | -1.219649 | 0.566023  |             |          | 549.0424  | 611.4682 | 640.695  |
|                                  | H         | -1.004537 | -1.9071   | 1.383273  |             |          | 659.5089  | 745.3609 | 832.9903 |
|                                  | C         | -0.883884 | 0.203542  | 1.118135  |             |          | 869.8294  | 882.9551 | 928.4743 |
|                                  | H         | -1.877936 | 0.305172  | 1.551195  |             |          | 938.7997  | 973.8311 | 994.1242 |
|                                  | H         | -0.146247 | 0.347653  | 1.904525  |             |          | 1010.387  | 1049.965 | 1107.635 |

|                                  |   |           |           |           |             |          |           |          |          |
|----------------------------------|---|-----------|-----------|-----------|-------------|----------|-----------|----------|----------|
|                                  | C | -0.781641 | 1.313881  | 0.081069  |             |          | 1172.646  | 1216.631 | 1227.238 |
|                                  | C | 1.798315  | 0.102713  | -0.584539 |             |          | 1281.64   | 1318.064 | 1326.174 |
|                                  | H | 2.098671  | 0.591759  | -1.500135 |             |          | 1365.048  | 1392.156 | 1423.058 |
|                                  | C | 2.318738  | 0.429804  | 0.625817  |             |          | 1439.601  | 1472.729 | 1487.083 |
|                                  | H | 2.081758  | -0.125753 | 1.516524  |             |          | 1503.416  | 1592.016 | 1753.807 |
|                                  | H | 2.965768  | 1.289031  | 0.681397  |             |          | 3081.096  | 3083.33  | 3103.594 |
|                                  | O | 0.405575  | 1.718797  | -0.305852 |             |          | 3154.829  | 3157.282 | 3164.878 |
|                                  | O | -1.776177 | 1.840937  | -0.365678 |             |          | 3217.824  | 3238.167 | 3327.409 |
|                                  | O | 0.580287  | -1.608609 | 0.294034  |             |          |           |          |          |
|                                  | O | 1.012108  | -0.932868 | -0.877324 |             |          |           |          |          |
| <b>TS22</b><br>(C <sub>i</sub> ) | C | 2.900294  | 0.177612  | 0.31447   | -534.758071 | 0.144267 | -717.5839 | 49.3997  | 108.9468 |
|                                  | H | 3.286479  | 1.188364  | 0.19786   |             |          | 135.6094  | 194.2772 | 219.1262 |
|                                  | H | 3.540524  | -0.51046  | -0.232811 |             |          | 263.2694  | 312.6143 | 359.4264 |
|                                  | H | 2.927517  | -0.087639 | 1.371616  |             |          | 425.2479  | 447.8274 | 475.0577 |
|                                  | C | 1.481076  | 0.09868   | -0.212737 |             |          | 489.7014  | 527.951  | 592.8817 |
|                                  | H | 1.438774  | 0.368062  | -1.269254 |             |          | 697.6636  | 766.1689 | 869.4214 |
|                                  | C | 0.547071  | 1.010124  | 0.595041  |             |          | 872.4366  | 909.4081 | 926.2414 |
|                                  | H | 0.406285  | 0.578465  | 1.585609  |             |          | 952.0521  | 961.6704 | 1023.106 |
|                                  | H | 1.045665  | 1.971914  | 0.704318  |             |          | 1069.173  | 1112.372 | 1137.24  |
|                                  | C | -0.773489 | 1.337731  | -0.069641 |             |          | 1146.787  | 1196.9   | 1202.715 |
|                                  | C | -1.664735 | -0.648245 | 0.829286  |             |          | 1278.554  | 1291.907 | 1313.891 |
|                                  | H | -1.469161 | -0.697332 | 1.891644  |             |          | 1373.438  | 1383.921 | 1415.23  |
|                                  | C | -1.614237 | -1.719127 | -0.007645 |             |          | 1420.069  | 1471.119 | 1490.897 |
|                                  | H | -1.514379 | -2.704426 | 0.421363  |             |          | 1504.168  | 1556.872 | 1891.119 |
|                                  | H | -2.069972 | -1.63927  | -0.98454  |             |          | 3074.002  | 3087.749 | 3097.557 |
|                                  | O | -1.869754 | 0.600893  | 0.303258  |             |          | 3146.311  | 3152.262 | 3164.375 |
|                                  | O | -0.911745 | 2.228413  | -0.845728 |             |          | 3180.089  | 3208.799 | 3281.408 |
|                                  | O | 1.113703  | -1.276245 | -0.095202 |             |          |           |          |          |
|                                  | O | 0.061845  | -1.554102 | -0.909634 |             |          |           |          |          |
| <b>TS23</b><br>(C <sub>i</sub> ) | C | 2.8881    | -0.265361 | 0.402077  | -534.743806 | 0.14345  | -539.4672 | 77.4425  | 128.2925 |
|                                  | H | 3.48497   | 0.644636  | 0.41942   |             |          | 142.9414  | 189.2639 | 217.8174 |
|                                  | H | 3.4053    | -1.015203 | -0.19272  |             |          | 233.5683  | 247.7026 | 305.5934 |
|                                  | H | 2.786215  | -0.637416 | 1.421618  |             |          | 360.3173  | 384.8195 | 456.5464 |
|                                  | C | 1.523273  | 0.021023  | -0.192586 |             |          | 466.7549  | 486.9235 | 599.1653 |
|                                  | H | 1.611204  | 0.406262  | -1.211372 |             |          | 610.3072  | 829.0263 | 852.982  |
|                                  | C | 0.734912  | 1.014745  | 0.669586  |             |          | 901.601   | 907.0171 | 926.3997 |
|                                  | H | 0.45575   | 0.531646  | 1.606788  |             |          | 941.0419  | 988.77   | 1064.898 |
|                                  | H | 1.358274  | 1.883674  | 0.887374  |             |          | 1085.001  | 1119.617 | 1125.146 |
|                                  | C | -0.483144 | 1.582113  | 0.003737  |             |          | 1179.527  | 1225.454 | 1290.624 |
|                                  | C | -1.769504 | -0.689111 | 0.864029  |             |          | 1295.22   | 1339.814 | 1366.945 |
|                                  | H | -1.75749  | -1.073343 | 1.890526  |             |          | 1383.941  | 1389.618 | 1412.86  |
|                                  | C | -1.380752 | -1.605482 | -0.272194 |             |          | 1442.151  | 1464.429 | 1488.745 |
|                                  | H | -1.127668 | -2.607366 | 0.076637  |             |          | 1504.509  | 1532.764 | 1999.968 |
|                                  | H | -2.199085 | -1.66227  | -0.993528 |             |          | 3045.178  | 3067.786 | 3070.248 |
|                                  | O | -2.073045 | 0.487031  | 0.631776  |             |          | 3073.175  | 3080.006 | 3123.347 |
|                                  | O | -0.623693 | 2.214376  | -0.964332 |             |          | 3131.678  | 3149.499 | 3160.956 |
|                                  | O | 0.867848  | -1.233152 | -0.233933 |             |          |           |          |          |
|                                  | O | -0.307958 | -1.070526 | -1.027589 |             |          |           |          |          |
| <b>P12</b>                       | C | 3.63255   | -0.516271 | -0.000031 | -383.856787 | 0.125083 | 61.9483   | 91.2013  | 127.2518 |



|                                 |                                 |           |           |           |             |             |          |          |          |
|---------------------------------|---------------------------------|-----------|-----------|-----------|-------------|-------------|----------|----------|----------|
| (C <sub>s</sub> )               | H                               | 4.214549  | -0.223961 | 0.875331  |             |             | 147.889  | 209.3722 | 229.1366 |
|                                 | H                               | 4.214752  | -0.223537 | -0.875114 |             |             | 268.0607 | 378.1391 | 425.33   |
|                                 | H                               | 3.518043  | -1.598007 | -0.000297 |             |             | 477.9267 | 704.3967 | 740.5381 |
|                                 | C                               | 2.315226  | 0.177196  | -0.000001 |             |             | 769.6954 | 875.1122 | 915.405  |
|                                 | H                               | 2.316126  | 1.26273   | 0.000046  |             |             | 924.6057 | 938.0326 | 1013.344 |
|                                 | C                               | 1.135649  | -0.432034 | -0.000014 |             |             | 1018.699 | 1056.788 | 1088.703 |
|                                 | H                               | 1.036562  | -1.508954 | -0.000065 |             |             | 1131.696 | 1186.536 | 1222.975 |
|                                 | C                               | -0.10817  | 0.360397  | 0.000029  |             |             | 1327.329 | 1329.941 | 1355.684 |
|                                 | C                               | -2.439537 | 0.109791  | 0.000004  |             |             | 1411.475 | 1427.313 | 1482.681 |
|                                 | H                               | -2.439642 | 1.189226  | 0.000077  |             |             | 1488.319 | 1738.417 | 1753.251 |
|                                 | C                               | -3.516587 | -0.651619 | -0.000056 |             |             | 1841.463 | 3061.998 | 3116.496 |
|                                 | H                               | -4.491469 | -0.191195 | -0.000032 |             |             | 3151.482 | 3181.356 | 3195.535 |
|                                 | H                               | -3.444568 | -1.729336 | -0.000129 |             |             | 3217.532 | 3248.814 | 3293.179 |
|                                 | O                               | -1.190042 | -0.464762 | -0.000025 |             |             |          |          |          |
|                                 | O                               | -0.189851 | 1.557046  | 0.000099  |             |             |          |          |          |
|                                 | <b>P13</b><br>(C <sub>i</sub> ) | C         | 2.007793  | -1.792334 | -0.269167   | -534.758071 | 0.143512 | 56.923   | 65.7835  |
| H                               |                                 | 1.776977  | -2.82686  | -0.520513 |             |             | 125.1402 | 163.5529 | 212.0155 |
| H                               |                                 | 2.814411  | -1.781488 | 0.461158  |             |             | 227.3281 | 263.5617 | 316.5892 |
| H                               |                                 | 2.344538  | -1.281236 | -1.169314 |             |             | 321.4073 | 372.307  | 452.9445 |
| C                               |                                 | 0.782194  | -1.113543 | 0.313039  |             |             | 543.1833 | 593.5523 | 617.7579 |
| H                               |                                 | 0.425542  | -1.646686 | 1.195131  |             |             | 636.9099 | 730.2411 | 843.1688 |
| C                               |                                 | -0.352477 | -1.016399 | -0.70079  |             |             | 888.0573 | 910.3917 | 919.2663 |
| H                               |                                 | -0.099557 | -0.320199 | -1.500664 |             |             | 940.8184 | 966.1206 | 1001.83  |
| H                               |                                 | -0.526389 | -1.992534 | -1.157629 |             |             | 1010.582 | 1080.011 | 1110.096 |
| C                               |                                 | -1.648064 | -0.604821 | -0.034419 |             |             | 1154.417 | 1188.146 | 1209.204 |
| C                               |                                 | 0.791164  | 2.070303  | -0.352013 |             |             | 1249.853 | 1309.226 | 1330.749 |
| H                               |                                 | 1.222716  | 2.68214   | -1.134095 |             |             | 1378.335 | 1395.049 | 1414.748 |
| C                               |                                 | -0.31867  | 2.375751  | 0.297352  |             |             | 1433.542 | 1450.587 | 1490.927 |
| H                               |                                 | -0.832943 | 3.283984  | 0.026386  |             |             | 1505.555 | 1730.278 | 1779.456 |
| H                               |                                 | -0.713869 | 1.763982  | 1.092749  |             |             | 3075.826 | 3085.188 | 3106.984 |
| O                               |                                 | -2.475632 | -0.036037 | -0.893827 |             |             | 3134.458 | 3151.353 | 3160.486 |
| O                               | -1.953966                       | -0.77966  | 1.113122  |           |             | 3199.761    | 3216.03  | 3297.88  |          |
| O                               | 1.090379                        | 0.162851  | 0.8634    |           |             |             |          |          |          |
| O                               | 1.591336                        | 0.978491  | -0.184847 |           |             |             |          |          |          |
| <b>P14</b><br>(C <sub>i</sub> ) | C                               | -1.608724 | 2.206993  | -0.48701  | -534.769341 | 0.143131    | 43.4675  | 54.5462  | 100.7913 |
|                                 | H                               | -2.411037 | 2.212417  | -1.222698 |             |             | 117.4267 | 140.8102 | 156.4705 |
|                                 | H                               | -0.804285 | 2.847075  | -0.844664 |             |             | 177.3618 | 229.902  | 240.5982 |
|                                 | H                               | -1.985089 | 2.61097   | 0.452327  |             |             | 320.4082 | 356.2434 | 412.6976 |
|                                 | C                               | -1.104664 | 0.792668  | -0.285973 |             |             | 481.4758 | 515.1394 | 606.7742 |
|                                 | H                               | -0.77532  | 0.364216  | -1.236991 |             |             | 639.0597 | 742.1689 | 808.0454 |
|                                 | C                               | -2.155515 | -0.120185 | 0.339443  |             |             | 878.2285 | 895.3999 | 936.9676 |
|                                 | H                               | -2.267018 | 0.095362  | 1.400376  |             |             | 994.973  | 1062.664 | 1070.421 |
|                                 | H                               | -3.126341 | 0.038621  | -0.137109 |             |             | 1107.328 | 1136.185 | 1137.743 |
|                                 | C                               | -1.86945  | -1.595829 | 0.142822  |             |             | 1182.358 | 1210.791 | 1275.961 |
|                                 | C                               | 2.659241  | 0.173667  | 0.164075  |             |             | 1284.195 | 1342.184 | 1375.894 |
|                                 | H                               | 2.697607  | 0.8163    | 1.062498  |             |             | 1390.191 | 1414.107 | 1417.527 |
|                                 | C                               | 1.467905  | -0.756576 | 0.096576  |             |             | 1435.789 | 1458.763 | 1488.809 |
|                                 | H                               | 1.105628  | -0.842398 | -0.929902 |             |             | 1503.866 | 1874.232 | 1968.011 |
|                                 | H                               | 1.769089  | -1.75054  | 0.435262  |             |             | 2977.139 | 3058.746 | 3072.788 |

|                                            |   |           |           |           |             |          |          |          |          |
|--------------------------------------------|---|-----------|-----------|-----------|-------------|----------|----------|----------|----------|
|                                            | O | 3.509451  | 0.201273  | -0.678546 |             |          | 3074.656 | 3078.303 | 3122.595 |
|                                            | O | -1.29529  | -2.102435 | -0.748691 |             |          | 3144.439 | 3150.692 | 3156.313 |
|                                            | O | 0.014506  | 0.933737  | 0.586618  |             |          |          |          |          |
|                                            | O | 0.454334  | -0.357131 | 0.990782  |             |          |          |          |          |
| <b>P15</b><br>(C <sub>i</sub> )            | C | 3.47213   | -0.379263 | -0.468465 | -383.84867  | 0.125275 | 38.6808  | 74.5985  | 77.5618  |
|                                            | H | 4.403529  | 0.161408  | -0.561617 |             |          | 142.59   | 155.5148 | 278.6377 |
|                                            | H | 3.404939  | -1.338556 | -0.96768  |             |          | 372.6988 | 426.3845 | 474.7839 |
|                                            | C | 2.457925  | 0.111124  | 0.224049  |             |          | 555.9477 | 619.2635 | 734.1659 |
|                                            | H | 2.54065   | 1.079662  | 0.702509  |             |          | 760.2552 | 906.7055 | 925.661  |
|                                            | C | 1.154063  | -0.59926  | 0.401573  |             |          | 932.3562 | 959.6759 | 982.6923 |
|                                            | H | 1.088624  | -1.48994  | -0.222919 |             |          | 1015.402 | 1024.938 | 1044.156 |
|                                            | H | 1.032268  | -0.93938  | 1.435216  |             |          | 1143.447 | 1180.909 | 1214.795 |
|                                            | C | -0.03326  | 0.283254  | 0.114345  |             |          | 1247.439 | 1325.066 | 1333.243 |
|                                            | C | -2.36467  | 0.193275  | -0.131025 |             |          | 1375.224 | 1427.742 | 1445.858 |
|                                            | H | -2.2767   | 1.260124  | -0.271483 |             |          | 1468.98  | 1742.886 | 1745.105 |
|                                            | C | -3.49258  | -0.48893  | -0.157346 |             |          | 1865.737 | 3053.553 | 3121.018 |
|                                            | H | -4.42189  | 0.03001   | -0.330496 |             |          | 3161.736 | 3193.537 | 3194.251 |
|                                            | H | -3.50791  | -1.55894  | -0.009116 |             |          | 3246.161 | 3250.627 | 3292.415 |
|                                            |   | O         | -1.17009  | -0.45809  |             |          | 0.088568 |          |          |
|                                            | O | -0.00806  | 1.467391  | -0.047717 |             |          |          |          |          |
| <b>HO<sub>2</sub></b><br>(C <sub>s</sub> ) | H | -0.880783 | -0.865155 | 0         | -150.908108 | 0.014185 | 1255.572 | 1461.847 | 3695.095 |
|                                            | O | 0.055049  | -0.600018 | 0         |             |          |          |          |          |
|                                            | O | 0.055049  | 0.708163  | 0         |             |          |          |          |          |

| P5 decomposition channels        |                          |          |          |                              |                  |                                                         |          |          |          |
|----------------------------------|--------------------------|----------|----------|------------------------------|------------------|---------------------------------------------------------|----------|----------|----------|
| Species                          | Cartesian coordinate (Å) |          |          | $E_{elec}^{0K}$<br>(Hartree) | ZPE<br>(Hartree) | Unscaled vibrational<br>frequencies (cm <sup>-1</sup> ) |          |          |          |
| <b>P5</b><br>(C <sub>i</sub> )   | C                        | 3.662812 | -0.44609 | -0.02122                     | -384.413816      | 0.133056                                                | 35.8639  | 61.1642  | 83.2738  |
|                                  | H                        | 3.837589 | -0.96972 | 0.92725                      |                  |                                                         | 110.5803 | 125.7683 | 140.2168 |
|                                  | H                        | 4.494561 | 0.237152 | -0.17661                     |                  |                                                         | 260.8614 | 299.7883 | 343.0207 |
|                                  | H                        | 3.701654 | -1.21195 | -0.8024                      |                  |                                                         | 412.4441 | 472.3048 | 567.4644 |
|                                  | C                        | 2.359746 | 0.263579 | -0.02283                     |                  |                                                         | 734.3549 | 735.6015 | 903.9821 |
|                                  | H                        | 2.300676 | 1.337444 | 0.055175                     |                  |                                                         | 910.4407 | 925.6689 | 928.9054 |
|                                  | C                        | 1.102265 | -0.51874 | 0.032349                     |                  |                                                         | 995.5143 | 1017.472 | 1021.669 |
|                                  | H                        | 1.028103 | -1.23529 | -0.79475                     |                  |                                                         | 1112.953 | 1164.403 | 1187.659 |
|                                  | H                        | 1.043107 | -1.14331 | 0.935024                     |                  |                                                         | 1198.763 | 1220.525 | 1321.169 |
|                                  | C                        | -0.14128 | 0.328419 | 0.008609                     |                  |                                                         | 1334.189 | 1409.921 | 1425.94  |
|                                  | C                        | -2.48066 | 0.142499 | -0.00754                     |                  |                                                         | 1439.241 | 1446.781 | 1478.986 |
|                                  | H                        | -2.45285 | 1.2218   | -0.01128                     |                  |                                                         | 1489.239 | 1743.664 | 1867.109 |
|                                  | C                        | -3.57655 | -0.59087 | -0.01268                     |                  |                                                         | 2998.195 | 3003.059 | 3030.753 |
|                                  | H                        | -4.5393  | -0.10516 | -0.02112                     |                  |                                                         | 3049.465 | 3143.315 | 3193.977 |
|                                  | H                        | -3.53268 | -1.67032 | -0.00869                     |                  |                                                         | 3239.813 | 3245.505 | 3291.894 |
|                                  | O                        | -1.24456 | -0.46461 | 0.003341                     |                  |                                                         |          |          |          |
| O                                | -0.18531                 | 1.522934 | 0.00132  |                              |                  |                                                         |          |          |          |
| <b>IM10</b><br>(C <sub>i</sub> ) | C                        | 2.882358 | -0.54567 | 0.679852                     | -384.393633      | 0.135                                                   | 37.7199  | 61.5022  | 94.7899  |
|                                  | H                        | 3.867196 | -0.94758 | 0.447218                     |                  |                                                         | 139.4692 | 175.357  | 230.6735 |
|                                  | H                        | 2.198919 | -1.38488 | 0.802644                     |                  |                                                         | 298.4527 | 337.9756 | 412.8628 |
|                                  | H                        | 2.952653 | -0.01826 | 1.632475                     |                  |                                                         | 468.7013 | 565.0609 | 629.0043 |
|                                  | C                        | 2.399128 | 0.389469 | -0.42185                     |                  |                                                         | 683.7571 | 798.1904 | 872.1647 |
|                                  | H                        | 3.10678  | 1.208779 | -0.55081                     |                  |                                                         | 887.0555 | 889.584  | 912.0288 |
|                                  | H                        | 2.352225 | -0.14716 | -1.36962                     |                  |                                                         | 992.4667 | 1073.018 | 1102.225 |
|                                  | C                        | 1.029646 | 0.981413 | -0.12279                     |                  |                                                         | 1118.85  | 1159.082 | 1173.827 |
|                                  | H                        | 0.993206 | 1.439156 | 0.86758                      |                  |                                                         | 1253.92  | 1303.638 | 1377.216 |
|                                  | H                        | 0.767915 | 1.771366 | -0.83109                     |                  |                                                         | 1399.099 | 1408.343 | 1418.515 |
|                                  | C                        | -0.07073 | -0.03773 | -0.20269                     |                  |                                                         | 1458.425 | 1489.619 | 1504.414 |
|                                  | C                        | -2.32984 | -0.29528 | 0.28484                      |                  |                                                         | 1513.258 | 1747.458 | 1886.294 |
|                                  | C                        | -3.5842  | 0.010975 | 0.079502                     |                  |                                                         | 3062.9   | 3069.132 | 3078.843 |
|                                  | H                        | -4.35201 | -0.73881 | 0.190752                     |                  |                                                         | 3105.774 | 3116.088 | 3135.088 |
|                                  | H                        | -3.86908 | 1.017304 | -0.21028                     |                  |                                                         | 3142.601 | 3146.724 | 3259.563 |
|                                  | O                        | -1.24397 | 0.49062  | 0.293926                     |                  |                                                         |          |          |          |
| O                                | -0.00304                 | -1.14299 | -0.63893 |                              |                  |                                                         |          |          |          |
| <b>TS24</b><br>(C <sub>i</sub> ) | C                        | -3.44022 | -0.2911  | -0.4881                      | -384.343102      | 0.126316                                                | -622.45  | 41.8605  | 61.5167  |
|                                  | H                        | -4.34347 | 0.290954 | -0.6039                      |                  |                                                         | 78.5436  | 130.3119 | 144.2997 |
|                                  | H                        | -4.43738 | -1.35844 | 0.905753                     |                  |                                                         | 220.6701 | 277.3712 | 347.4845 |
|                                  | H                        | -3.39077 | -1.23347 | -1.01966                     |                  |                                                         | 384.9342 | 427.1949 | 476.9593 |
|                                  | C                        | -2.37704 | 0.201441 | 0.149588                     |                  |                                                         | 561.9851 | 656.2322 | 736.0212 |
|                                  | H                        | -2.42397 | 1.177032 | 0.617087                     |                  |                                                         | 764.3173 | 907.3055 | 927.906  |
|                                  | C                        | -1.09919 | -0.55123 | 0.317184                     |                  |                                                         | 930.4223 | 961.2549 | 991.8411 |
|                                  | H                        | -1.01424 | -0.9438  | 1.337196                     |                  |                                                         | 1014.156 | 1025.951 | 1027.987 |
|                                  | H                        | -1.04391 | -1.41531 | -0.3445                      |                  |                                                         | 1144.293 | 1180.222 | 1215.404 |
|                                  | C                        | 0.11982  | 0.308498 | 0.101901                     |                  |                                                         | 1241.247 | 1316.261 | 1329.787 |
|                                  | C                        | 2.452347 | 0.161073 | -0.09635                     |                  |                                                         | 1372.268 | 1427.726 | 1442.896 |

|                                  |   |          |          |          |             |          |          |          |          |
|----------------------------------|---|----------|----------|----------|-------------|----------|----------|----------|----------|
|                                  | H | 2.399398 | 1.236153 | -0.17922 |             |          | 1465.252 | 1685.974 | 1743.944 |
|                                  | C | 3.559143 | -0.55395 | -0.13639 |             |          | 1865.168 | 3040.375 | 3119.167 |
|                                  | H | 4.507444 | -0.05575 | -0.26057 |             |          | 3162.693 | 3194.202 | 3199.129 |
|                                  | H | 3.538681 | -1.63041 | -0.0473  |             |          | 3246.151 | 3254.041 | 3292.154 |
|                                  | O | 1.233648 | -0.4642  | 0.061652 |             |          |          |          |          |
|                                  | O | 0.131234 | 1.499774 | 0.001861 |             |          |          |          |          |
| <b>TS25</b><br>(C <sub>i</sub> ) | C | 3.619726 | -0.49931 | -0.12104 | -384.349747 | 0.126413 | -785.983 | 64.523   | 92.6142  |
|                                  | H | 4.178496 | -0.19388 | -1.00723 |             |          | 126.3775 | 145.1005 | 182.364  |
|                                  | H | 3.500565 | -1.58075 | -0.1347  |             |          | 213.8307 | 266.3817 | 348.76   |
|                                  | H | 4.23111  | -0.22709 | 0.742534 |             |          | 378.7916 | 405.5081 | 430.8068 |
|                                  | C | 2.309152 | 0.198806 | -0.06114 |             |          | 480.4763 | 722.1316 | 744.6421 |
|                                  | H | 2.306296 | 1.283512 | -0.07017 |             |          | 770.1992 | 868.1475 | 915.524  |
|                                  | C | 1.123962 | -0.42029 | 0.054794 |             |          | 926.3796 | 937.6872 | 1016.343 |
|                                  | H | 1.027566 | -1.4953  | -0.01749 |             |          | 1018.782 | 1053.796 | 1070.708 |
|                                  | H | 0.796173 | -0.7072  | 1.935366 |             |          | 1131.633 | 1185.423 | 1222.612 |
|                                  | C | -0.12801 | 0.371928 | 0.024929 |             |          | 1319.865 | 1329.467 | 1348.216 |
|                                  | C | -2.45587 | 0.117592 | -0.03529 |             |          | 1410.104 | 1427.472 | 1479.728 |
|                                  | H | -2.45907 | 1.196759 | -0.00394 |             |          | 1486.424 | 1681.232 | 1744.148 |
|                                  | C | -3.52909 | -0.64719 | -0.08576 |             |          | 1847.393 | 3053.363 | 3106.243 |
|                                  | H | -4.50571 | -0.1901  | -0.09671 |             |          | 3148.407 | 3186.119 | 3194.12  |
|                                  | H | -3.45246 | -1.72438 | -0.11517 |             |          | 3211.947 | 3246.886 | 3291.677 |
|                                  |   | O        | -1.20393 | -0.45393 |             |          | -0.01826 |          |          |
|                                  | O | -0.20385 | 1.567582 | 0.03183  |             |          |          |          |          |
| <b>TS26</b><br>(C <sub>i</sub> ) | C | 1.757135 | -1.74356 | -0.26679 | -384.360732 | 0.131474 | -339.273 | 37.6711  | 44.545   |
|                                  | H | 1.466691 | -1.9936  | 0.752283 |             |          | 85.4248  | 104.828  | 143.4824 |
|                                  | H | 2.571124 | -2.40229 | -0.57443 |             |          | 170.7799 | 232.6741 | 268.8059 |
|                                  | H | 0.909068 | -1.95918 | -0.92269 |             |          | 428.5756 | 441.9167 | 444.6751 |
|                                  | C | 2.152351 | -0.31081 | -0.37744 |             |          | 686.3016 | 721.8062 | 767.7774 |
|                                  | H | 2.499356 | 0.032245 | -1.34607 |             |          | 885.9105 | 927.1403 | 933.5834 |
|                                  | C | 2.009454 | 0.590059 | 0.614356 |             |          | 943.5512 | 963.7286 | 1010.097 |
|                                  | H | 1.758469 | 0.265201 | 1.616801 |             |          | 1019.415 | 1057.429 | 1113.395 |
|                                  | H | 2.359769 | 1.606056 | 0.500233 |             |          | 1154.985 | 1196.868 | 1306.487 |
|                                  | C | -0.1206  | 1.188003 | 0.237693 |             |          | 1329.057 | 1404.126 | 1420.045 |
|                                  | C | -2.00485 | -0.13578 | -0.16826 |             |          | 1441.561 | 1476.166 | 1492.383 |
|                                  | H | -2.25739 | 0.644829 | -0.87104 |             |          | 1631.916 | 1737.337 | 1862.54  |
|                                  | C | -2.71793 | -1.21718 | 0.069502 |             |          | 3043.844 | 3097.166 | 3138.976 |
|                                  | H | -3.64075 | -1.3732  | -0.46689 |             |          | 3158.267 | 3172.984 | 3189.952 |
|                                  | H | -2.39971 | -1.95298 | 0.793938 |             |          | 3238.144 | 3252.929 | 3287.67  |
|                                  |   | O        | -0.81363 | 0.072939 |             |          | 0.515874 |          |          |
|                                  | O | -0.40137 | 2.040621 | -0.53294 |             |          |          |          |          |
| <b>TS27</b><br>(C <sub>i</sub> ) | C | -2.76879 | 0.387412 | 0.086706 | -384.366888 | 0.129761 | -1617.06 | 90.6669  | 103.3486 |
|                                  | H | -3.45656 | -0.45977 | 0.158146 |             |          | 115.0179 | 200.3076 | 237.8806 |
|                                  | H | -3.23432 | 1.140761 | -0.54584 |             |          | 271.6625 | 338.2671 | 395.8394 |
|                                  | H | -2.65532 | 0.802707 | 1.089096 |             |          | 463.3997 | 556.6099 | 577.9893 |
|                                  | C | -1.43678 | -0.04941 | -0.46433 |             |          | 670.7743 | 701.4906 | 808.8386 |
|                                  | H | -1.45006 | -0.30086 | -1.52345 |             |          | 834.4529 | 884.2847 | 907.8264 |
|                                  | C | -0.68089 | -1.05894 | 0.370401 |             |          | 941.7262 | 1014.84  | 1079.365 |

|                                  |   |          |          |          |             |          |          |          |          |
|----------------------------------|---|----------|----------|----------|-------------|----------|----------|----------|----------|
|                                  | H | -0.75299 | -0.7739  | 1.424921 |             |          | 1118.051 | 1140.041 | 1180.132 |
|                                  | H | -1.06261 | -2.07369 | 0.271993 |             |          | 1216.338 | 1278.747 | 1296.845 |
|                                  | C | 0.79441  | -1.11822 | 0.038976 |             |          | 1330.866 | 1379.456 | 1407.712 |
|                                  | C | 0.733372 | 1.248767 | -0.06861 |             |          | 1413.283 | 1462.05  | 1491.713 |
|                                  | H | -0.60354 | 0.909961 | -0.37821 |             |          | 1496.362 | 1614.484 | 1723.311 |
|                                  | C | 1.251705 | 2.440802 | 0.128462 |             |          | 1897.419 | 3043.202 | 3054.52  |
|                                  | H | 0.620389 | 3.315147 | 0.098337 |             |          | 3102.685 | 3118.32  | 3133.867 |
|                                  | H | 2.312407 | 2.564288 | 0.317189 |             |          | 3144.965 | 3153.894 | 3265.248 |
|                                  | O | 1.433341 | 0.087756 | -0.11063 |             |          |          |          |          |
|                                  | O | 1.432211 | -2.11614 | -0.0721  |             |          |          |          |          |
| <b>TS28</b><br>(C <sub>i</sub> ) | C | 2.398914 | -0.69942 | 1.049181 | -384.354841 | 0.130253 | -678.993 | 25.5373  | 36.9951  |
|                                  | H | 2.948903 | -1.61254 | 1.269046 |             |          | 90.1081  | 108.283  | 159.0464 |
|                                  | H | 1.466327 | -0.72916 | 1.615512 |             |          | 183.4931 | 242.5299 | 291.893  |
|                                  | H | 2.986406 | 0.145084 | 1.412375 |             |          | 341.4104 | 375.5854 | 521.3813 |
|                                  | C | 2.12044  | -0.57224 | -0.44208 |             |          | 531.9741 | 576.2195 | 726.2338 |
|                                  | H | 3.053372 | -0.5831  | -1.00523 |             |          | 771.2711 | 828.0225 | 899.7378 |
|                                  | H | 1.521452 | -1.41372 | -0.78639 |             |          | 923.5091 | 944.296  | 1055.023 |
|                                  | C | 1.384479 | 0.724518 | -0.77735 |             |          | 1071.28  | 1088.274 | 1130.919 |
|                                  | H | 1.963875 | 1.608379 | -0.49765 |             |          | 1227.517 | 1277.591 | 1344.796 |
|                                  | H | 1.157751 | 0.778521 | -1.84407 |             |          | 1377.907 | 1417.833 | 1419.425 |
|                                  | C | 0.066865 | 0.807741 | -0.087   |             |          | 1444.373 | 1491.56  | 1503.45  |
|                                  | C | -2.09926 | -0.73073 | -0.22084 |             |          | 1507.466 | 1898.429 | 2010.094 |
|                                  | C | -3.20695 | -0.33676 | 0.35425  |             |          | 3052.984 | 3056.891 | 3087.824 |
|                                  | H | -3.20781 | 0.543611 | 0.987611 |             |          | 3111.991 | 3116.194 | 3139.155 |
|                                  | H | -4.12562 | -0.88398 | 0.207774 |             |          | 3140.403 | 3144.238 | 3244.472 |
|                                  | O | -0.93503 | -0.7516  | -0.55953 |             |          |          |          |          |
|                                  | O | -0.53392 | 1.625125 | 0.482538 |             |          |          |          |          |
| <b>P16</b><br>(C <sub>i</sub> )  | C | 3.472129 | -0.37926 | -0.46847 | -383.84867  | 0.125284 | 38.6818  | 74.5989  | 77.5604  |
|                                  | H | 4.403528 | 0.16141  | -0.56162 |             |          | 142.59   | 155.5151 | 278.6377 |
|                                  | H | 3.404937 | -1.33855 | -0.96769 |             |          | 372.6988 | 426.3847 | 474.7838 |
|                                  | C | 2.457925 | 0.111123 | 0.224051 |             |          | 555.9482 | 619.2636 | 734.1667 |
|                                  | H | 2.540651 | 1.079658 | 0.702516 |             |          | 760.2552 | 906.7054 | 925.6612 |
|                                  | C | 1.154063 | -0.59927 | 0.401572 |             |          | 932.356  | 959.6758 | 982.6926 |
|                                  | H | 1.088624 | -1.48994 | -0.22292 |             |          | 1015.402 | 1024.938 | 1044.157 |
|                                  | H | 1.032266 | -0.93938 | 1.435214 |             |          | 1143.447 | 1180.909 | 1214.796 |
|                                  | C | -0.03326 | 0.283253 | 0.114345 |             |          | 1247.439 | 1325.066 | 1333.243 |
|                                  | C | -2.36467 | 0.193276 | -0.13103 |             |          | 1375.224 | 1427.742 | 1445.858 |
|                                  | H | -2.2767  | 1.260124 | -0.27149 |             |          | 1468.98  | 1742.886 | 1745.105 |
|                                  | C | -3.49258 | -0.48893 | -0.15735 |             |          | 1865.737 | 3053.555 | 3121.019 |
|                                  | H | -4.42189 | 0.030012 | -0.3305  |             |          | 3161.735 | 3193.538 | 3194.251 |
|                                  | H | -3.50791 | -1.55894 | -0.00911 |             |          | 3246.161 | 3250.627 | 3292.415 |
|                                  | O | -1.17009 | -0.45809 | 0.088568 |             |          |          |          |          |
|                                  | O | -0.00806 | 1.46739  | -0.04772 |             |          |          |          |          |
| <b>P17</b><br>(C <sub>s</sub> )  | C | 3.632549 | -0.51627 | -2.6E-05 | -383.856787 | 0.125065 | 61.9425  | 91.2017  | 127.2515 |
|                                  | H | 4.214611 | -0.22392 | 0.875279 |             |          | 147.8886 | 209.3697 | 229.1361 |
|                                  | H | 4.214686 | -0.22357 | -0.87517 |             |          | 268.0611 | 378.1395 | 425.3303 |
|                                  | H | 3.518045 | -1.598   | -0.00024 |             |          | 477.9268 | 704.397  | 740.5383 |

|                                                        |          |          |          |          |             |          |          |          |          |
|--------------------------------------------------------|----------|----------|----------|----------|-------------|----------|----------|----------|----------|
|                                                        | C        | 2.315223 | 0.177195 | 0.000055 |             |          | 769.6952 | 875.1123 | 915.4051 |
|                                                        | H        | 2.316119 | 1.262728 | 0.000245 |             |          | 924.6061 | 938.0331 | 1013.344 |
|                                                        | C        | 1.135649 | -0.43204 | -8.9E-05 |             |          | 1018.699 | 1056.788 | 1088.703 |
|                                                        | H        | 1.036563 | -1.50896 | -0.00028 |             |          | 1131.695 | 1186.536 | 1222.975 |
|                                                        | C        | -0.10817 | 0.360394 | 0.000013 |             |          | 1327.33  | 1329.941 | 1355.685 |
|                                                        | C        | -2.43954 | 0.109792 | 0.00001  |             |          | 1411.475 | 1427.314 | 1482.681 |
|                                                        | H        | -2.43964 | 1.189228 | 0.000105 |             |          | 1488.319 | 1738.419 | 1753.255 |
|                                                        | C        | -3.51659 | -0.65162 | -4.2E-05 |             |          | 1841.463 | 3061.999 | 3116.498 |
|                                                        | H        | -4.49147 | -0.19119 | 0.000011 |             |          | 3151.481 | 3181.357 | 3195.535 |
|                                                        | H        | -3.44457 | -1.72933 | -0.00014 |             |          | 3217.531 | 3248.814 | 3293.179 |
|                                                        | O        | -1.19004 | -0.46476 | -0.00006 |             |          |          |          |          |
|                                                        | O        | -0.18985 | 1.557044 | 0.000142 |             |          |          |          |          |
| <b>C<sub>3</sub>H<sub>6</sub></b><br>(C <sub>s</sub> ) | C        | 1.227147 | 0.162153 | 0.00002  | -117.885253 | 0.07783  | 206.829  | 430.3826 | 595.9591 |
|                                                        | H        | 1.796852 | -0.15041 | 0.876745 |             |          | 938.2616 | 946.3016 | 965.8084 |
|                                                        | H        | 1.164595 | 1.249316 | -0.00051 |             |          | 1033.377 | 1079.371 | 1194.811 |
|                                                        | H        | 1.797215 | -0.15127 | -0.87615 |             |          | 1328.858 | 1406.707 | 1453.505 |
|                                                        | C        | -0.13451 | -0.4558  | 0.000067 |             |          | 1484.63  | 1497.028 | 1737.92  |
|                                                        | H        | -0.17107 | -1.54082 | 0.000254 |             |          | 3056.795 | 3110.99  | 3137.595 |
|                                                        | C        | -1.27222 | 0.221615 | 0.00     |             |          | 3158.417 | 3166.981 | 3247.865 |
|                                                        | H        | -2.23016 | -0.27985 | -1.3E-05 |             |          |          |          |          |
|                                                        | H        | -1.27995 | 1.305215 | -0.00031 |             |          |          |          |          |
| <b>P18</b><br>(C <sub>s</sub> )                        | C        | 1.229748 | 0.320985 | 0.000037 | -266.478525 | 0.053269 | 95.5912  | 232.1194 | 241.4289 |
|                                                        | C        | -1.08696 | 0.406783 | -2.8E-05 |             |          | 496.9458 | 615.3055 | 724.8141 |
|                                                        | H        | -0.9265  | 1.475347 | -6.3E-05 |             |          | 933.6616 | 946.3311 | 994.0768 |
|                                                        | C        | -2.25752 | -0.19209 | 0.000048 |             |          | 1175.476 | 1195.568 | 1339.464 |
|                                                        | H        | -3.15555 | 0.404215 | 0.000079 |             |          | 1421.364 | 1745.377 | 1950.393 |
|                                                        | H        | -2.33796 | -1.26891 | 0.000075 |             |          | 3199.317 | 3230.139 | 3298.657 |
|                                                        | O        | 0.077944 | -0.34689 | -8.7E-05 |             |          |          |          |          |
|                                                        | O        | 2.310605 | -0.1312  | 0.000033 |             |          |          |          |          |
| <b>H</b>                                               | H        | 0        | 0        | 0        | -0.4982065  | 0        |          |          |          |
| <b>P19</b><br>(C <sub>i</sub> )                        | C        | -1.59397 | -0.7335  | -0.27835 | -231.787025 | 0.098412 | 112.2572 | 165.7691 | 211.49   |
|                                                        | H        | -2.43674 | -1.17246 | 0.25358  |             |          | 287.6716 | 355.1808 | 634.0802 |
|                                                        | H        | -0.86163 | -1.52083 | -0.45337 |             |          | 771.8512 | 795.3603 | 848.1928 |
|                                                        | H        | -1.955   | -0.38217 | -1.24614 |             |          | 913.8678 | 1055.693 | 1069.38  |
|                                                        | C        | -0.98005 | 0.411436 | 0.516817 |             |          | 1121.222 | 1231.294 | 1280.168 |
|                                                        | H        | -1.73088 | 1.180996 | 0.70382  |             |          | 1339.093 | 1375.703 | 1417.896 |
|                                                        | H        | -0.63971 | 0.051326 | 1.488387 |             |          | 1444.404 | 1490.819 | 1505.03  |
|                                                        | C        | 0.197187 | 1.058618 | -0.20875 |             |          | 1513.26  | 1975.378 | 3058.352 |
|                                                        | H        | -0.06012 | 1.350179 | -1.22874 |             |          | 3065.438 | 3070.988 | 3103.733 |
|                                                        | H        | 0.541239 | 1.968722 | 0.287927 |             |          | 3113.728 | 3129.72  | 3141.661 |
|                                                        | C        | 1.423103 | 0.171044 | -0.2967  |             |          |          |          |          |
| O                                                      | 1.608153 | -0.86517 | 0.224562 |          |             |          |          |          |          |
| <b>P20</b><br>(C <sub>2v</sub> )                       | C        | 0.103236 | -0.00019 | 0.00001  | -152.598692 | 0.030938 | 448.6755 | 574.9146 | 608.5927 |
|                                                        | C        | -1.20406 | 0.000047 | -3.3E-05 |             |          | 990.8089 | 1184.534 | 1417.437 |
|                                                        | H        | -1.72864 | 0.940547 | 0.00007  |             |          | 2256.528 | 3201.27  | 3303.092 |
|                                                        | H        | -1.72889 | -0.94026 | 0.00007  |             |          |          |          |          |
|                                                        | O        | 1.257811 | 0.000072 | 0        |             |          |          |          |          |

| IM7 + NO channels                |                          |          |          |                              |                  |                                                         |          |          |          |
|----------------------------------|--------------------------|----------|----------|------------------------------|------------------|---------------------------------------------------------|----------|----------|----------|
| Species                          | Cartesian coordinate (Å) |          |          | $E_{elec}^{0K}$<br>(Hartree) | ZPE<br>(Hartree) | Unscaled vibrational<br>frequencies (cm <sup>-1</sup> ) |          |          |          |
| <b>IM7</b><br>(C <sub>1</sub> )  | C                        | 3.035313 | -0.94994 | -0.54838                     | -534.798878      | 0.144343                                                | 28.5235  | 56.6011  | 81.2232  |
|                                  | H                        | 2.945785 | -2.01621 | -0.75135                     |                  |                                                         | 116.3817 | 130.4796 | 158.7725 |
|                                  | H                        | 3.942357 | -0.78072 | 0.028575                     |                  |                                                         | 225.6783 | 243.3031 | 300.3351 |
|                                  | H                        | 3.113725 | -0.41578 | -1.49369                     |                  |                                                         | 327.9461 | 390.2289 | 438.0228 |
|                                  | C                        | 1.824618 | -0.47524 | 0.224241                     |                  |                                                         | 486.0032 | 557.5284 | 640.8856 |
|                                  | H                        | 1.732887 | -0.97693 | 1.18551                      |                  |                                                         | 735.1964 | 744.6401 | 835.3032 |
|                                  | C                        | 0.533688 | -0.59638 | -0.55701                     |                  |                                                         | 907.174  | 920.7876 | 930.1354 |
|                                  | H                        | 0.53479  | 0.090866 | -1.40191                     |                  |                                                         | 946.1844 | 1014.661 | 1022.506 |
|                                  | H                        | 0.444966 | -1.60526 | -0.96575                     |                  |                                                         | 1069.78  | 1131.558 | 1156.149 |
|                                  | C                        | -0.68124 | -0.3509  | 0.299363                     |                  |                                                         | 1186.1   | 1225.793 | 1245.534 |
|                                  | C                        | -2.97942 | 0.083095 | 0.148338                     |                  |                                                         | 1272.58  | 1328.765 | 1338.788 |
|                                  | H                        | -2.93874 | 0.070319 | 1.226963                     |                  |                                                         | 1400.54  | 1415.309 | 1422.473 |
|                                  | C                        | -4.0639  | 0.279849 | -0.5742                      |                  |                                                         | 1431.853 | 1449.569 | 1489.568 |
|                                  | H                        | -5.00746 | 0.445501 | -0.07907                     |                  |                                                         | 1506.61  | 1744.83  | 1864.118 |
|                                  | H                        | -4.02939 | 0.281676 | -1.65396                     |                  |                                                         | 3077.295 | 3086.488 | 3130.945 |
|                                  | O                        | -1.76619 | -0.1254  | -0.47591                     |                  |                                                         | 3143.49  | 3155.443 | 3162.23  |
|                                  | O                        | -0.7046  | -0.37846 | 1.494896                     |                  |                                                         | 3194.795 | 3248.057 | 3293.153 |
| O                                | 2.014759                 | 0.916722 | 0.623548 |                              |                  |                                                         |          |          |          |
| O                                | 2.111866                 | 1.70758  | -0.39871 |                              |                  |                                                         |          |          |          |
| <b>NO</b><br>(C <sub>ov</sub> )  | N                        | 0        | 0        | -0.60637                     | -129.893355      | 0.004577                                                | 2069.264 |          |          |
|                                  | O                        | 0        | 0        | 0.53057                      |                  |                                                         |          |          |          |
| <b>IM11</b><br>(C <sub>1</sub> ) | C                        | 2.578182 | -2.01849 | 0.092414                     | -664.731238      | 0.152391                                                | 20.9654  | 42.6776  | 72.5966  |
|                                  | H                        | 2.434406 | -2.7228  | 0.910027                     |                  |                                                         | 84.9555  | 119.482  | 129.2606 |
|                                  | H                        | 3.581184 | -1.60296 | 0.162279                     |                  |                                                         | 160.1661 | 220.1621 | 226.0368 |
|                                  | H                        | 2.483521 | -2.55066 | -0.85382                     |                  |                                                         | 256.5093 | 293.4625 | 331.0674 |
|                                  | C                        | 1.5465   | -0.91474 | 0.183934                     |                  |                                                         | 390.858  | 417.9918 | 464.0083 |
|                                  | H                        | 1.609735 | -0.39953 | 1.143097                     |                  |                                                         | 501.1388 | 539.9627 | 595.7504 |
|                                  | C                        | 0.127882 | -1.41644 | -0.03095                     |                  |                                                         | 626.4345 | 734.1324 | 753.5239 |
|                                  | H                        | -0.04639 | -1.64141 | -1.08183                     |                  |                                                         | 859.2944 | 898.2313 | 905.3756 |
|                                  | H                        | -0.01081 | -2.34186 | 0.533481                     |                  |                                                         | 927.421  | 929.8555 | 949.7142 |
|                                  | C                        | -0.91437 | -0.45423 | 0.477046                     |                  |                                                         | 1014.608 | 1024.376 | 1040.236 |
|                                  | C                        | -3.12742 | 0.229828 | 0.13105                      |                  |                                                         | 1099.128 | 1137.168 | 1178.685 |
|                                  | H                        | -2.93058 | 0.901479 | 0.95279                      |                  |                                                         | 1185.217 | 1224.777 | 1260.301 |
|                                  | C                        | -4.27078 | 0.126378 | -0.51625                     |                  |                                                         | 1332.046 | 1346.603 | 1383.711 |
|                                  | H                        | -5.10119 | 0.751123 | -0.22813                     |                  |                                                         | 1414.079 | 1423.459 | 1432.147 |
|                                  | H                        | -4.39515 | -0.56972 | -1.33298                     |                  |                                                         | 1450.436 | 1490.068 | 1505.513 |
|                                  | O                        | -2.05723 | -0.56128 | -0.23485                     |                  |                                                         | 1746.257 | 1837.54  | 1855.564 |
|                                  | O                        | -0.77396 | 0.280719 | 1.412468                     |                  |                                                         | 3073.726 | 3077.682 | 3102.535 |
|                                  | O                        | 1.928858 | -0.00455 | -0.86184                     |                  |                                                         | 3142.479 | 3151.743 | 3160.552 |
|                                  | O                        | 0.971464 | 1.013006 | -0.98195                     |                  |                                                         | 3194.934 | 3247.594 | 3293.037 |
| N                                | 1.250242                 | 2.132048 | -0.15365 |                              |                  |                                                         |          |          |          |
| O                                | 2.178813                 | 2.014374 | 0.52206  |                              |                  |                                                         |          |          |          |

|                                  |          |          |          |          |             |          |          |          |          |
|----------------------------------|----------|----------|----------|----------|-------------|----------|----------|----------|----------|
| <b>IM12</b><br>(C <sub>i</sub> ) | C        | 2.427878 | 0.961521 | 0.890917 | -459.631417 | 0.139183 | 37.3625  | 80.3333  | 83.5751  |
|                                  | H        | 1.631427 | 1.702317 | 0.930634 |             |          | 124.3438 | 150.3873 | 219.3347 |
|                                  | C        | 1.082182 | 1.49312  | 0.41928  |             |          | 1392.216 | 1402.014 | 1421.294 |
|                                  | H        | 1.631762 | 2.271972 | 0.921716 |             |          | 1426.875 | 1462.49  | 1478.881 |
|                                  | C        | -0.11359 | 1.770471 | -0.41807 |             |          | 1490.572 | 1504.546 | 1881.385 |
|                                  | H        | -0.35384 | 2.828821 | -0.34681 |             |          | 2981.945 | 3001.494 | 3070.93  |
|                                  | H        | 0.114767 | 1.534081 | -1.46882 |             |          | 3077.204 | 3139.611 | 3145.887 |
|                                  | O        | 1.843904 | 0.386953 | 0.182986 |             |          | 3154.766 | 3159.317 | 3246.763 |
|                                  | O        | 1.891382 | -1.7102  | -0.49426 |             |          |          |          |          |
|                                  | O        | -1.28819 | 1.078191 | -0.03154 |             |          |          |          |          |
| <b>IM15</b><br>(C <sub>i</sub> ) | C        | -3.24751 | -0.84577 | -0.02086 | -459.625757 | 0.139812 | 32.3146  | 58.7313  | 89.2273  |
|                                  | H        | -3.22955 | -1.7071  | -0.68797 |             |          | 134.7736 | 154.9192 | 231.5358 |
|                                  | H        | -4.15516 | -0.27526 | -0.20591 |             |          | 253.5055 | 308.0445 | 358.7197 |
|                                  | H        | -3.26874 | -1.1986  | 1.010637 |             |          | 423.2807 | 461.1523 | 481.523  |
|                                  | C        | -2.03469 | 0.03374  | -0.2378  |             |          | 505.714  | 588.8944 | 633.3172 |
|                                  | H        | -2.02248 | 0.395437 | -1.27175 |             |          | 747.814  | 868.9148 | 876.3263 |
|                                  | C        | -0.74563 | -0.74032 | 0.016801 |             |          | 899.9279 | 925.4205 | 964.7654 |
|                                  | H        | -0.72193 | -1.09538 | 1.050355 |             |          | 1009.187 | 1080.183 | 1113.041 |
|                                  | H        | -0.67044 | -1.62046 | -0.62436 |             |          | 1131.784 | 1179.92  | 1194.114 |
|                                  | C        | 0.471864 | 0.10575  | -0.20539 |             |          | 1240.81  | 1301.26  | 1353.901 |
|                                  | C        | 2.790275 | -0.0115  | -0.24486 |             |          | 1399.821 | 1400.498 | 1411.23  |
|                                  | C        | 3.929369 | -0.18293 | 0.372024 |             |          | 1440.067 | 1451.695 | 1488.225 |
|                                  | H        | 4.809274 | 0.349765 | 0.046265 |             |          | 1504.515 | 1748.506 | 1864.932 |
|                                  | H        | 4.004265 | -0.85527 | 1.220568 |             |          | 3033.284 | 3068.162 | 3072.004 |
|                                  | O        | 1.614687 | -0.63657 | -0.06295 |             |          | 3116.467 | 3141.128 | 3144.372 |
|                                  | O        | 0.492795 | 1.270864 | -0.46908 |             |          | 3156.283 | 3261.939 | 3845.245 |
|                                  | O        | -2.14366 | 1.128685 | 0.650008 |             |          |          |          |          |
| H                                | -1.43791 | 1.749169 | 0.438821 |          |             |          |          |          |          |
| <b>TS29</b><br>(C <sub>i</sub> ) | C        | 2.800677 | -0.3515  | 0.044611 | -459.605777 | 0.139449 | -481.942 | 65.8167  | 100.435  |
|                                  | H        | 3.093304 | -1.24802 | 0.591779 |             |          | 151.6631 | 207.1732 | 241.5374 |
|                                  | H        | 3.429022 | 0.478575 | 0.359216 |             |          | 276.1096 | 324.1657 | 379.9971 |
|                                  | H        | 2.949647 | -0.5213  | -1.02129 |             |          | 454.6551 | 484.5345 | 542.2026 |
|                                  | C        | 1.333075 | -0.0315  | 0.320212 |             |          | 594.949  | 626.5413 | 708.5215 |
|                                  | H        | 1.223421 | 0.164147 | 1.392704 |             |          | 850.0222 | 864.8855 | 886.6259 |
|                                  | C        | 0.451031 | -1.22368 | -0.07023 |             |          | 922.6873 | 940.4872 | 993.2801 |
|                                  | H        | 0.650636 | -2.07934 | 0.570852 |             |          | 1000.843 | 1060.158 | 1113.787 |
|                                  | H        | 0.694987 | -1.49629 | -1.10167 |             |          | 1148.332 | 1192.795 | 1226.488 |
|                                  | C        | -1.03698 | -0.99676 | -0.06058 |             |          | 1267.366 | 1311.121 | 1312.104 |
|                                  | C        | -1.01944 | 1.345176 | -0.40593 |             |          | 1357.442 | 1383.959 | 1395.296 |
|                                  | H        | -0.92886 | 2.017172 | -1.24438 |             |          | 1431.721 | 1453.847 | 1482.388 |
|                                  | C        | -1.02635 | 1.769735 | 0.876577 |             |          | 1502.101 | 1589.499 | 1894.682 |
|                                  | H        | -0.73371 | 2.782363 | 1.101351 |             |          | 3020.022 | 3060.113 | 3065.887 |
|                                  | H        | -1.2606  | 1.095438 | 1.689003 |             |          | 3140.521 | 3149.186 | 3159.136 |
|                                  | O        | -1.45764 | 0.111158 | -0.77572 |             |          | 3182.443 | 3248.073 | 3294.64  |
|                                  | O        | -1.84582 | -1.74636 | 0.382988 |             |          |          |          |          |
| O                                | 1.037212 | 1.102505 | -0.42796 |          |             |          |          |          |          |
| <b>TS30</b>                      | C        | 2.472123 | -1.13982 | 0.10196  | -459.620002 | 0.140436 | -221.717 | 55.4901  | 87.9451  |



|                           |          |          |          |          |             |          |          |          |          |
|---------------------------|----------|----------|----------|----------|-------------|----------|----------|----------|----------|
| (C <sub>i</sub> )         | H        | 2.512785 | -2.00641 | 0.759962 |             |          | 207.3824 | 242.4559 | 254.8136 |
|                           | H        | 3.319707 | -0.49283 | 0.319724 |             |          | 282.0078 | 326.9545 | 375.2874 |
|                           | H        | 2.547127 | -1.48104 | -0.92994 |             |          | 444.6658 | 490.3731 | 579.4386 |
|                           | C        | 1.169945 | -0.39912 | 0.305809 |             |          | 608.7532 | 630.7402 | 676.4396 |
|                           | H        | 1.130537 | -0.01251 | 1.32413  |             |          | 839.8601 | 867.6073 | 878.0274 |
|                           | C        | -0.03685 | -1.27523 | 0.007455 |             |          | 922.1875 | 966.3446 | 983.7741 |
|                           | H        | -0.0821  | -2.08736 | 0.731373 |             |          | 1011.007 | 1070.577 | 1143.309 |
|                           | H        | 0.112462 | -1.73256 | -0.97434 |             |          | 1166.218 | 1249.327 | 1269.209 |
|                           | C        | -1.43734 | -0.66823 | -0.04364 |             |          | 1286.602 | 1311.829 | 1370.22  |
|                           | C        | 0.314847 | 1.683486 | -0.41011 |             |          | 1382.737 | 1399.865 | 1423.765 |
|                           | H        | 0.119697 | 2.248675 | -1.31155 |             |          | 1450.094 | 1469.838 | 1490.629 |
|                           | C        | -0.19685 | 2.101635 | 0.783331 |             |          | 1504.879 | 1598.776 | 1750.478 |
|                           | H        | -0.00188 | 1.615355 | 1.72437  |             |          | 3068.854 | 3073.665 | 3098.004 |
|                           | H        | -0.88838 | 2.927706 | 0.772925 |             |          | 3137.489 | 3153.191 | 3155.681 |
|                           | O        | -1.59463 | 0.592413 | -0.35213 |             |          | 3213.929 | 3222.032 | 3314.615 |
|                           | O        | -2.39371 | -1.39524 | 0.109109 |             |          |          |          |          |
|                           | O        | 1.177676 | 0.703399 | -0.61767 |             |          |          |          |          |
| TS31<br>(C <sub>i</sub> ) | C        | 2.796049 | -0.44863 | -0.08363 | -459.608444 | 0.139906 | -445.616 | 35.9153  | 94.2486  |
|                           | H        | 3.00127  | -1.48387 | 0.187188 |             |          | 136.4952 | 192.6445 | 237.0995 |
|                           | H        | 3.484951 | 0.201363 | 0.451361 |             |          | 282.5387 | 315.8433 | 405.3652 |
|                           | H        | 2.950847 | -0.31885 | -1.15425 |             |          | 456.2298 | 473.8107 | 545.885  |
|                           | C        | 1.353718 | -0.09517 | 0.27922  |             |          | 596.8568 | 695.9182 | 781.7011 |
|                           | H        | 1.197149 | -0.30623 | 1.345922 |             |          | 876.7364 | 887.2386 | 922.1975 |
|                           | C        | 0.3789   | -0.95002 | -0.54839 |             |          | 935.1388 | 967.4979 | 971.7831 |
|                           | H        | 0.376787 | -0.56091 | -1.56765 |             |          | 1009.971 | 1057.012 | 1106.233 |
|                           | H        | 0.724217 | -1.98174 | -0.55162 |             |          | 1130.742 | 1188.609 | 1217.902 |
|                           | C        | -1.03483 | -1.01794 | -0.01921 |             |          | 1274.408 | 1307.869 | 1320.209 |
|                           | C        | -1.43441 | 1.290209 | -0.4172  |             |          | 1358.505 | 1382.634 | 1394.334 |
|                           | H        | -1.72054 | 1.81754  | -1.31638 |             |          | 1433.435 | 1464.483 | 1483.548 |
|                           | C        | -0.71775 | 1.843226 | 0.573742 |             |          | 1501.891 | 1612.653 | 1886.548 |
|                           | H        | -0.44727 | 2.884101 | 0.516847 |             |          | 2995.028 | 3068.182 | 3085.843 |
|                           | H        | -0.59571 | 1.332701 | 1.518747 |             |          | 3145.849 | 3154.316 | 3157.928 |
|                           | O        | -1.88557 | 0.005813 | -0.37937 |             |          | 3190.39  | 3220.065 | 3298.726 |
|                           | O        | -1.47358 | -1.93099 | 0.604882 |             |          |          |          |          |
| O                         | 1.231418 | 1.260903 | 0.007313 |          |             |          |          |          |          |
| TS32<br>(C <sub>i</sub> ) | C        | 2.704317 | 0.402727 | 0.160471 | -459.604897 | 0.140275 | -625.241 | 69.0939  | 143.5615 |
|                           | H        | 2.977676 | 1.452579 | 0.067684 |             |          | 204.4941 | 239.9972 | 283.9335 |
|                           | H        | 3.358092 | -0.19017 | -0.47593 |             |          | 306.248  | 332.6421 | 360.5993 |
|                           | H        | 2.851121 | 0.088861 | 1.194152 |             |          | 390.0912 | 478.1163 | 506.4182 |
|                           | C        | 1.260124 | 0.191211 | -0.24468 |             |          | 508.5266 | 631.0468 | 789.7465 |
|                           | H        | 1.092351 | 0.556828 | -1.26539 |             |          | 846.408  | 899.3924 | 920.2354 |
|                           | C        | 0.315104 | 0.957275 | 0.706882 |             |          | 937.853  | 976.4172 | 1065.774 |
|                           | H        | 0.232744 | 0.406158 | 1.644353 |             |          | 1107.488 | 1113.084 | 1137.178 |
|                           | H        | 0.732304 | 1.944805 | 0.905847 |             |          | 1167.122 | 1228.983 | 1283.6   |
|                           | C        | -1.05335 | 1.243556 | 0.1478   |             |          | 1301.647 | 1344.634 | 1369.557 |
|                           | C        | -1.2817  | -1.34625 | 0.453028 |             |          | 1381.969 | 1399.148 | 1418.963 |
|                           | H        | -1.2466  | -1.9699  | 1.353766 |             |          | 1445.489 | 1486.893 | 1488.686 |

|                                  |          |          |          |          |             |          |          |          |          |
|----------------------------------|----------|----------|----------|----------|-------------|----------|----------|----------|----------|
|                                  | C        | -0.26041 | -1.60824 | -0.62107 |             |          | 1504.503 | 1551.718 | 1962.739 |
|                                  | H        | -0.1873  | -2.6763  | -0.82413 |             |          | 3022.489 | 3044.07  | 3051.135 |
|                                  | H        | -0.55787 | -1.08284 | -1.53496 |             |          | 3070.048 | 3081.14  | 3122.629 |
|                                  | O        | -2.0739  | -0.39255 | 0.384114 |             |          | 3138.109 | 3146.051 | 3156.085 |
|                                  | O        | -1.38144 | 1.898155 | -0.76356 |             |          |          |          |          |
|                                  | O        | 1.035698 | -1.20207 | -0.20555 |             |          |          |          |          |
| <b>TS33</b><br>(C <sub>1</sub> ) | C        | -1.93727 | -0.66392 | -1.02609 | -459.596715 | 0.13417  | -1786.58 | 53.6405  | 104.3852 |
|                                  | H        | -2.75493 | 0.05143  | -0.93411 |             |          | 133.5107 | 202.108  | 245.3995 |
|                                  | H        | -2.31488 | -1.58167 | -1.47137 |             |          | 313.5616 | 350.0797 | 370.3366 |
|                                  | H        | -1.18855 | -0.24228 | -1.69943 |             |          | 408.2926 | 472.609  | 547.9201 |
|                                  | C        | -1.32101 | -0.96416 | 0.330497 |             |          | 551.7136 | 609.2504 | 690.4337 |
|                                  | H        | -2.06363 | -1.44158 | 0.978751 |             |          | 749.7755 | 824.231  | 852.8153 |
|                                  | C        | -0.8635  | 0.313304 | 1.066834 |             |          | 869.3493 | 912.4103 | 931.6009 |
|                                  | H        | -1.72711 | 0.850543 | 1.448616 |             |          | 974.8776 | 1007.895 | 1055.405 |
|                                  | H        | -0.22116 | 0.022898 | 1.899229 |             |          | 1102.75  | 1149.69  | 1178.267 |
|                                  | C        | -0.14683 | 1.291096 | 0.170258 |             |          | 1217.231 | 1267.46  | 1294.682 |
|                                  | C        | 1.576134 | -0.32818 | -0.1292  |             |          | 1353.07  | 1367.713 | 1406.661 |
|                                  | H        | 0.721308 | -1.25545 | 0.019254 |             |          | 1418.396 | 1468.59  | 1478.248 |
|                                  | C        | 2.857036 | -0.61881 | -0.09262 |             |          | 1491.291 | 1504.415 | 1732.274 |
|                                  | H        | 3.174556 | -1.64021 | 0.045728 |             |          | 1899.114 | 3035.58  | 3062.286 |
|                                  | H        | 3.600998 | 0.160949 | -0.20221 |             |          | 3091.249 | 3132.324 | 3157.199 |
|                                  | O        | 1.047704 | 0.888284 | -0.38609 |             |          | 3165.99  | 3166.741 | 3278.274 |
| O                                | -0.545   | 2.376161 | -0.10848 |          |             |          |          |          |          |
| O                                | -0.27945 | -1.90202 | 0.244242 |          |             |          |          |          |          |
| <b>TS34</b><br>(C <sub>1</sub> ) | C        | 3.242451 | -0.16071 | -0.39394 | -459.586238 | 0.127871 | -669.362 | 43.9486  | 50.1539  |
|                                  | H        | 3.485917 | 0.456984 | -1.25787 |             |          | 96.2417  | 129.4356 | 163.3212 |
|                                  | H        | 3.707589 | -1.1363  | -0.51579 |             |          | 172.916  | 239.6814 | 255.9393 |
|                                  | H        | 3.654246 | 0.30612  | 0.50133  |             |          | 318.137  | 357.7787 | 414.0082 |
|                                  | C        | 1.744223 | -0.32342 | -0.2458  |             |          | 452.1334 | 486.6269 | 519.5427 |
|                                  | H        | 1.333934 | -0.80969 | -1.13479 |             |          | 545.3959 | 573.7448 | 742.4311 |
|                                  | C        | 1.07665  | 1.04222  | -0.08397 |             |          | 805.3561 | 876.4774 | 922.7215 |
|                                  | H        | 1.4795   | 1.54852  | 0.797999 |             |          | 953.1038 | 986.425  | 1053.51  |
|                                  | H        | 1.249054 | 1.684981 | -0.95185 |             |          | 1072.389 | 1084.256 | 1191.497 |
|                                  | C        | -0.40019 | 0.984821 | 0.113864 |             |          | 1213.299 | 1285.784 | 1306.003 |
|                                  | C        | -2.28601 | -0.85753 | -0.23838 |             |          | 1396.231 | 1402.844 | 1414.222 |
|                                  | C        | -3.53783 | -0.49853 | -0.12312 |             |          | 1418.069 | 1446.309 | 1487.812 |
|                                  | H        | -3.79238 | 0.499397 | 0.216897 |             |          | 1505.597 | 1891.023 | 2019.714 |
|                                  | H        | -4.32933 | -1.19379 | -0.35915 |             |          | 3048.479 | 3059.037 | 3069.218 |
|                                  | O        | -1.0705  | -0.77742 | -0.22291 |             |          | 3105.252 | 3139.951 | 3141.38  |
|                                  | O        | -1.24362 | 1.764908 | 0.28482  |             |          | 3159.048 | 3242.867 | 3835.078 |
| O                                | 1.511649 | -1.12002 | 0.895493 |          |             |          |          |          |          |
| H                                | 0.595544 | -1.41705 | 0.872151 |          |             |          |          |          |          |

|                                  |   |           |           |           |              |          |           |           |           |
|----------------------------------|---|-----------|-----------|-----------|--------------|----------|-----------|-----------|-----------|
| <b>TS35</b><br>(C <sub>i</sub> ) | C | 1.287116  | 1.47634   | -0.657396 | -459.6067698 | 0.136439 | -612.9903 | 46.1044   | 50.45     |
|                                  | H | 0.402253  | 1.220868  | -1.237717 |              |          | 88.5837   | 106.0099  | 177.4556  |
|                                  | H | 1.906394  | 2.146373  | -1.255865 |              |          | 206.4973  | 228.7932  | 250.7569  |
|                                  | H | 1.00015   | 1.99658   | 0.254401  |              |          | 349.475   | 412.6061  | 460.2239  |
|                                  | C | 2.126845  | 0.262092  | -0.336614 |              |          | 491.8107  | 661.9268  | 730.0677  |
|                                  | H | 2.135648  | -0.52746  | -1.106859 |              |          | 749.5223  | 754.1497  | 871.1599  |
|                                  | C | 0.951057  | -0.894312 | 0.844707  |              |          | 876.7006  | 877.1945  | 932.4683  |
|                                  | H | 1.553799  | -1.78839  | 0.816734  |              |          | 970.5477  | 1013.8996 | 1031.6098 |
|                                  | H | 0.947073  | -0.321711 | 1.759805  |              |          | 1054.4902 | 1084.5527 | 1128.9294 |
|                                  | C | -0.286741 | -0.934932 | 0.059708  |              |          | 1191.5418 | 1285.5947 | 1329.2552 |
|                                  | C | -2.386296 | 0.086637  | -0.140132 |              |          | 1365.6753 | 1399.2401 | 1427.1703 |
|                                  | H | -2.503544 | -0.581559 | -0.980083 |              |          | 1465.0168 | 1473.5714 | 1477.3358 |
|                                  | C | -3.274093 | 0.976347  | 0.259139  |              |          | 1555.6071 | 1741.5238 | 1812.7374 |
|                                  | H | -4.205822 | 1.071872  | -0.275291 |              |          | 2966.0475 | 3067.3276 | 3139.0529 |
|                                  | H | -3.090264 | 1.612181  | 1.113005  |              |          | 3164.7347 | 3186.588  | 3192.0308 |
|                                  | O | -1.193383 | -0.0439   | 0.537254  |              |          | 3244.8254 | 3290.575  | 3297.0332 |
|                                  | O | -0.468862 | -1.626204 | -0.906376 |              |          |           |           |           |
|                                  | O | 3.080618  | 0.33738   | 0.461047  |              |          |           |           |           |
| <b>P21</b><br>(C <sub>i</sub> )  | C | 0.055993  | 2.064117  | 0.525185  | -459.626227  | 0.140417 | 30.3657   | 43.3604   | 131.9765  |
|                                  | H | 1.066172  | 2.04793   | 0.934922  |              |          | 159.8478  | 197.6921  | 234.6381  |
|                                  | H | -0.6017   | 2.549424  | 1.242907  |              |          | 264.5711  | 309.8621  | 366.8198  |
|                                  | H | 0.057417  | 2.645374  | -0.39669  |              |          | 413.0568  | 466.3684  | 521.4011  |
|                                  | C | -0.41731  | 0.654275  | 0.250492  |              |          | 622.6233  | 664.6683  | 731.5998  |
|                                  | H | -0.46087  | 0.08678   | 1.181424  |              |          | 873.4371  | 878.7607  | 893.0402  |
|                                  | C | 0.505839  | -0.07281  | -0.73495  |              |          | 911.2574  | 937.2974  | 1011.577  |
|                                  | H | 0.724394  | 0.566453  | -1.59061  |              |          | 1026.306  | 1043.633  | 1120.135  |
|                                  | H | 0.031139  | -0.98523  | -1.09897  |              |          | 1164.437  | 1191.119  | 1255.315  |
|                                  | C | 1.773306  | -0.50028  | -0.03121  |              |          | 1262.902  | 1311.977  | 1364.125  |
|                                  | C | -2.49938  | -0.35955  | -0.27766  |              |          | 1388.743  | 1400.103  | 1428.315  |
|                                  | H | -3.45107  | -0.15107  | -0.74789  |              |          | 1454.105  | 1466.174  | 1488.215  |
|                                  | C | -2.22263  | -1.55236  | 0.236006  |              |          | 1507.295  | 1710.371  | 1781.407  |
|                                  | H | -2.98238  | -2.31615  | 0.18474   |              |          | 3069.184  | 3079.499  | 3093.867  |
|                                  | H | -1.28663  | -1.80565  | 0.711507  |              |          | 3132.381  | 3143.856  | 3158.029  |
|                                  | O | 1.845172  | -1.02118  | 1.048194  |              |          | 3195.66   | 3217.385  | 3284.246  |
|                                  | O | 2.837717  | -0.22868  | -0.76502  |              |          |           |           |           |
|                                  | O | -1.71681  | 0.745067  | -0.31174  |              |          |           |           |           |
| <b>P22</b><br>(C <sub>i</sub> )  | C | -0.95495  | 2.161408  | -0.54899  | -459.630015  | 0.140071 | 45.6947   | 69.0893   | 84.9648   |
|                                  | H | -1.56086  | 2.284358  | -1.44618  |              |          | 140.0013  | 160.7297  | 175.7579  |
|                                  | H | -0.00823  | 2.67382   | -0.71304  |              |          | 224.4851  | 273.8754  | 318.6169  |
|                                  | H | -1.46355  | 2.638008  | 0.289093  |              |          | 351.7434  | 433.048   | 453.142   |
|                                  | C | -0.73975  | 0.686695  | -0.24971  |              |          | 589.5406  | 668.6878  | 730.9602  |
|                                  | H | -0.25996  | 0.19403   | -1.10467  |              |          | 805.3817  | 855.4304  | 891.631   |
|                                  | C | -2.0598   | -0.011    | 0.041423  |              |          | 952.5807  | 1053.289  | 1059.331  |
|                                  | H | -2.47749  | 0.350559  | 0.9816    |              |          | 1123.136  | 1131.074  | 1150.054  |
|                                  | H | -2.79987  | 0.190849  | -0.7354   |              |          | 1196.686  | 1231.748  | 1289.186  |
|                                  | C | -1.94155  | -1.51824  | 0.126208  |              |          | 1299.215  | 1351.473  | 1375.033  |
|                                  | C | 2.020571  | -0.54615  | -0.06088  |              |          | 1404.538  | 1414.839  | 1419.263  |

|                                               |   |          |          |          |              |          |          |          |          |
|-----------------------------------------------|---|----------|----------|----------|--------------|----------|----------|----------|----------|
|                                               | H | 1.388716 | -1.45336 | -0.06366 |              |          | 1431.604 | 1471.265 | 1495.172 |
|                                               | C | 1.439299 | 0.640797 | 0.684044 |              |          | 1500.972 | 1864.303 | 1977.78  |
|                                               | H | 1.921047 | 0.682194 | 1.662734 |              |          | 2984.587 | 3022.346 | 3058.169 |
|                                               | H | 1.698099 | 1.558463 | 0.148282 |              |          | 3069.102 | 3084.399 | 3110.689 |
|                                               | O | 3.096836 | -0.5138  | -0.58856 |              |          | 3128.597 | 3144.303 | 3146.531 |
|                                               | O | -1.03464 | -2.19229 | -0.19219 |              |          |          |          |          |
|                                               | O | 0.060197 | 0.506082 | 0.909337 |              |          |          |          |          |
| <b>P23</b><br>(C <sub>i</sub> )               | C | -2.15032 | -0.31816 | -0.13182 | -307.018297  | 0.103216 | 92.0651  | 182.035  | 199.121  |
|                                               | H | -2.35473 | -1.26677 | -0.62716 |              |          | 236.0242 | 331.4581 | 409.2874 |
|                                               | H | -2.80054 | 0.446754 | -0.55195 |              |          | 461.1165 | 478.6162 | 651.4259 |
|                                               | H | -2.37802 | -0.41737 | 0.929884 |              |          | 843.325  | 849.8883 | 906.4279 |
|                                               | C | -0.70076 | 0.082846 | -0.30959 |              |          | 962.7051 | 1071.107 | 1081.441 |
|                                               | H | -0.47635 | 0.19315  | -1.37639 |              |          | 1176.162 | 1214.487 | 1290.254 |
|                                               | C | 0.231779 | -0.98266 | 0.272331 |              |          | 1301.462 | 1384.634 | 1401.23  |
|                                               | H | 0.060741 | -1.09223 | 1.346716 |              |          | 1426.236 | 1446.514 | 1486.861 |
|                                               | H | 0.069069 | -1.96189 | -0.17942 |              |          | 1503.124 | 1964.143 | 3038.38  |
|                                               | C | 1.693365 | -0.63655 | 0.108078 |              |          | 3056.016 | 3072.491 | 3126.993 |
|                                               | O | 2.15462  | 0.379423 | -0.26742 |              |          | 3134.295 | 3142.919 | 3852.713 |
|                                               | O | -0.52066 | 1.318276 | 0.351075 |              |          |          |          |          |
|                                               | H | 0.363748 | 1.643911 | 0.155069 |              |          |          |          |          |
| <b>P24</b><br>(C <sub>2v</sub> )              | C | 0.103236 | -0.00019 | 0.00001  | -152.598692  | 0.030938 | 448.6755 | 574.9146 | 608.5927 |
|                                               | C | -1.20406 | 0.000047 | -3.3E-05 |              |          | 990.8089 | 1184.534 | 1417.437 |
|                                               | H | -1.72864 | 0.940547 | 0.00007  |              |          | 2256.528 | 3201.27  | 3303.092 |
|                                               | H | -1.72889 | -0.94026 | 0.00007  |              |          |          |          |          |
|                                               | O | 1.257811 | 0.000072 | 0        |              |          |          |          |          |
| <b>P25</b><br>(C <sub>i</sub> )               | C | -2.0641  | -0.86013 | 0.000015 | -459.6067698 | 0.139496 | 83.9378  | 147.5195 | 224.3893 |
|                                               | H | -3.07536 | -0.49157 | 0.000002 |              |          | 373.1647 | 414.3953 | 458.9535 |
|                                               | H | -1.85227 | -1.91588 | 0.000047 |              |          | 626.2036 | 669.1002 | 732.3538 |
|                                               | C | -0.99339 | 0.104832 | -3E-06   |              |          | 766.4527 | 866.1816 | 923.4856 |
|                                               | C | 1.344216 | 0.288726 | -6E-06   |              |          | 1015.62  | 1020.891 | 1064.138 |
|                                               | H | 1.142512 | 1.349216 | -0.00003 |              |          | 1199.883 | 1296.267 | 1332.696 |
|                                               | C | 2.54546  | -0.2569  | 0.000008 |              |          | 1428.222 | 1464.601 | 1742.073 |
|                                               | H | 3.415966 | 0.379057 | -5E-06   |              |          | 1768.077 | 3195.58  | 3206.023 |
|                                               | H | 2.67783  | -1.32884 | 0.000032 |              |          | 3244.853 | 3293.412 | 3327.709 |
|                                               | O | 0.22504  | -0.50881 | 0.000009 |              |          |          |          |          |
|                                               | O | -1.13777 | 1.302424 | -2.6E-05 |              |          |          |          |          |
| <b>CH<sub>3</sub>CHO</b><br>(C <sub>i</sub> ) | C | 1.162433 | -0.14769 | 0.000052 | -305.8001503 | 0.079384 | 151.822  | 510.1776 | 776.4245 |
|                                               | H | 1.695372 | 0.223264 | 0.877167 |              |          | 900.4127 | 1137.312 | 1144.032 |
|                                               | H | 1.695608 | 0.223763 | -0.87671 |              |          | 1377.939 | 1430.32  | 1463.83  |
|                                               | H | 1.147115 | -1.23369 | -0.00025 |              |          | 1472.177 | 1867.09  | 2967.654 |
|                                               | C | -0.23316 | 0.398227 | 0.000037 |              |          | 3050.086 | 3116.41  | 3166.298 |
|                                               | H | -0.31482 | 1.501853 | 0.00019  |              |          |          |          |          |
|                                               | O | -1.22487 | -0.2773  | -0.00012 |              |          |          |          |          |

Table S2. Calculated total rate constants,  $k_{\text{total}}(T, P)$ , of the “ $VB + OH \rightarrow \text{products}$ ” reaction at different pressures for the temperature range of 200 - 2000 K. Units:  $\text{cm}^3 \text{ molecule}^{-1} \text{ s}^{-1}$ .

| T (K)      | 0.76 Torr       | 7.6 Torr        | 76 Torr         | 760 Torr        | 7600 Torr       |
|------------|-----------------|-----------------|-----------------|-----------------|-----------------|
| 200        | 1.33E-10        | 1.35E-10        | 1.48E-10        | 2.03E-10        | 3.16E-10        |
| <b>298</b> | <b>1.88E-11</b> | <b>1.89E-11</b> | <b>1.93E-11</b> | <b>2.16E-11</b> | <b>2.79E-11</b> |
| <b>300</b> | <b>1.81E-11</b> | <b>1.82E-11</b> | <b>1.86E-11</b> | <b>2.07E-11</b> | <b>2.67E-11</b> |
| 400        | 3.69E-12        | 3.69E-12        | 3.70E-12        | 3.82E-12        | 4.55E-12        |
| 500        | 1.33E-12        | 1.34E-12        | 1.34E-12        | 1.37E-12        | 1.52E-12        |
| 600        | 9.80E-13        | 9.82E-13        | 9.96E-13        | 9.92E-13        | 1.02E-12        |
| 700        | 1.16E-12        | 1.17E-12        | 1.17E-12        | 1.17E-12        | 1.19E-12        |
| 800        | 1.70E-12        | 1.70E-12        | 1.69E-12        | 1.69E-12        | 1.70E-12        |
| 900        | 2.54E-12        | 2.53E-12        | 2.53E-12        | 2.52E-12        | 2.53E-12        |
| 1000       | 3.69E-12        | 3.69E-12        | 3.69E-12        | 3.69E-12        | 3.68E-12        |
| 1100       | 5.18E-12        | 5.19E-12        | 5.17E-12        | 5.18E-12        | 5.21E-12        |
| 1200       | 7.09E-12        | 7.05E-12        | 7.10E-12        | 7.07E-12        | 7.04E-12        |
| 1300       | 9.38E-12        | 9.34E-12        | 9.37E-12        | 9.37E-12        | 9.36E-12        |
| 1400       | 1.21E-11        | 1.21E-11        | 1.21E-11        | 1.21E-11        | 1.21E-11        |
| 1500       | 1.53E-11        | 1.53E-11        | 1.53E-11        | 1.53E-11        | 1.53E-11        |
| 1600       | 1.90E-11        | 1.91E-11        | 1.91E-11        | 1.90E-11        | 1.90E-11        |
| 1700       | 2.33E-11        | 2.33E-11        | 2.33E-11        | 2.32E-11        | 2.33E-11        |
| 1800       | 2.80E-11        | 2.80E-11        | 2.81E-11        | 2.81E-11        | 2.81E-11        |
| 1900       | 3.34E-11        | 3.34E-11        | 3.35E-11        | 3.35E-11        | 3.34E-11        |
| 2000       | 3.94E-11        | 3.94E-11        | 3.94E-11        | 3.94E-11        | 3.94E-11        |

Table S3. Calculated Eckart tunneling factors via transition state channels at  $P = 760$  Torr for the temperature range of 200 – 400 K.

| <b>T(K)</b> | <b>200</b>        | <b>250</b>        | <b>300</b> | <b>350</b> | <b>400</b> |
|-------------|-------------------|-------------------|------------|------------|------------|
| via TS1     | 184.0             | 27.9              | 9.9        | 5.4        | 3.6        |
| via TS2     | 52.8              | 15.1              | 7.2        | 4.5        | 3.3        |
| via TS3     | 98.0              | 21.1              | 8.8        | 5.1        | 3.6        |
| via TS4     | 36.6              | 9.0               | 4.4        | 2.9        | 2.3        |
| via TS5     | 5.6               | 2.9               | 2.1        | 1.7        | 1.5        |
| via TS6     | 23.2              | 6.6               | 3.6        | 2.5        | 2.0        |
| via TS7     | 1.5               | 1.3               | 1.2        | 1.1        | 1.1        |
| via TS8     | 1.3               | 1.2               | 1.1        | 1.1        | 1.1        |
| via TS9     | $3.6 \times 10^8$ | $3.1 \times 10^4$ | 264.0      | 27.2       | 9.0        |
| via TS10    | 1.5               | 1.3               | 1.2        | 1.1        | 1.1        |
| via TS11    | $1.5 \times 10^6$ | $1.6 \times 10^3$ | 59.4       | 12.9       | 5.9        |
| via TS12    | 4.3               | 2.5               | 1.9        | 1.6        | 1.4        |
| via TS13    | 1.2               | 1.2               | 1.1        | 1.1        | 1.1        |
| via TS14    | $3.8 \times 10^6$ | $3.0 \times 10^3$ | 87.9       | 16.3       | 6.9        |
| via TS15    | 2.2               | 1.6               | 1.4        | 1.3        | 1.2        |
| via TS16    | $2.2 \times 10^6$ | $1.7 \times 10^3$ | 56.8       | 12.1       | 5.6        |
| via TS17    | 1.5               | 1.3               | 1.2        | 1.1        | 1.1        |
| via TS18    | 17.3              | 4.9               | 2.8        | 2.1        | 1.7        |
| via TS19    | 51.7              | 8.5               | 3.9        | 2.6        | 2.0        |
| via TS20    | 5.6               | 2.6               | 1.9        | 1.6        | 1.4        |
| via TS21    | 1.1               | 1.1               | 1.1        | 1.0        | 1.0        |
| via TS22    | 4.3               | 2.3               | 1.7        | 1.5        | 1.4        |
| via TS23    | 2.1               | 1.6               | 1.4        | 1.3        | 1.2        |
| via TS24    | 2.3               | 1.7               | 1.4        | 1.3        | 1.2        |
| via TS25    | 4.1               | 2.4               | 1.8        | 1.6        | 1.4        |
| via TS26    | 1.3               | 1.2               | 1.1        | 1.1        | 1.1        |
| via TS27    | $5.4 \times 10^4$ | $4.4 \times 10^2$ | 39.1       | 11.2       | 5.6        |
| via TS28    | 3.5               | 2.1               | 1.6        | 1.4        | 1.3        |

Table S4. Individual rate constants  $k(T, P)$  for “ $VB + OH \rightarrow products$ ” reaction at  $P = 760$  Torr for the temperature range of 200 - 2000 K. Units:  $\text{cm}^3 \text{molecule}^{-1} \text{s}^{-1}$ .

| P [Torr] | T [K] | RC       | IM1      | IM2      | IM3      | IM4      | IM5      | IM6      | P1 + H <sub>2</sub> O | P2 + H <sub>2</sub> O | P3 + H <sub>2</sub> O | P4 + H <sub>2</sub> O | P5 + H <sub>2</sub> O | P6 + H <sub>2</sub> O | P7 + CH <sub>3</sub> | P8 + H   | P9 + C <sub>3</sub> H <sub>6</sub> | P10 + C <sub>2</sub> H <sub>4</sub> | P11 + CH <sub>3</sub> |
|----------|-------|----------|----------|----------|----------|----------|----------|----------|-----------------------|-----------------------|-----------------------|-----------------------|-----------------------|-----------------------|----------------------|----------|------------------------------------|-------------------------------------|-----------------------|
| 760      | 200   | 1.04E-11 | 1.20E-12 | 3.30E-12 | 3.20E-17 | 3.20E-17 | 3.20E-17 | 9.61E-17 | 1.60E-16              | 1.76E-15              | 4.90E-15              | 3.63E-11              | 1.53E-10              | 1.96E-12              | 3.20E-17             | 3.20E-17 | 3.20E-17                           | 3.20E-17                            | 3.20E-17              |
| 760      | 298   | 8.61E-15 | 3.21E-13 | 8.08E-13 | 3.20E-17 | 3.20E-17 | 3.20E-17 | 9.60E-17 | 1.15E-15              | 2.62E-15              | 2.34E-14              | 4.74E-12              | 1.55E-11              | 2.36E-13              | 3.20E-17             | 3.20E-17 | 3.20E-17                           | 3.20E-17                            | 3.20E-17              |
| 760      | 300   | 7.10E-15 | 3.16E-13 | 7.89E-13 | 3.20E-17 | 3.20E-17 | 3.20E-17 | 6.40E-17 | 7.68E-16              | 3.65E-15              | 2.40E-14              | 4.56E-12              | 1.48E-11              | 2.28E-13              | 3.20E-17             | 3.20E-17 | 3.20E-17                           | 3.20E-17                            | 3.20E-17              |
| 760      | 400   | 3.20E-17 | 9.85E-14 | 2.29E-13 | 3.20E-17 | 3.20E-17 | 3.20E-17 | 2.24E-16 | 4.87E-15              | 6.69E-15              | 8.08E-14              | 1.01E-12              | 2.34E-12              | 4.47E-14              | 3.20E-17             | 3.20E-17 | 3.20E-17                           | 3.20E-17                            | 3.20E-17              |
| 760      | 500   | 3.20E-17 | 3.89E-14 | 9.60E-14 | 3.20E-17 | 3.20E-17 | 3.20E-17 | 6.40E-17 | 1.87E-14              | 1.50E-14              | 2.07E-13              | 3.60E-13              | 6.15E-13              | 1.50E-14              | 3.20E-17             | 3.20E-17 | 3.20E-17                           | 3.20E-17                            | 3.20E-17              |
| 760      | 600   | 3.21E-17 | 1.92E-14 | 4.69E-14 | 3.21E-17 | 3.21E-17 | 3.21E-17 | 6.41E-17 | 4.86E-14              | 2.95E-14              | 4.31E-13              | 1.81E-13              | 2.33E-13              | 6.70E-15              | 3.21E-17             | 3.21E-17 | 3.21E-17                           | 3.21E-17                            | 3.21E-17              |
| 760      | 700   | 3.21E-17 | 1.07E-14 | 2.31E-14 | 3.21E-17 | 3.21E-17 | 3.21E-17 | 4.49E-16 | 1.10E-13              | 4.67E-14              | 7.83E-13              | 9.70E-14              | 1.01E-13              | 3.01E-15              | 3.21E-17             | 3.21E-17 | 3.21E-17                           | 3.21E-17                            | 3.21E-17              |
| 760      | 800   | 3.21E-17 | 6.14E-15 | 1.39E-14 | 3.21E-17 | 6.43E-17 | 3.21E-17 | 3.21E-16 | 2.13E-13              | 7.93E-14              | 1.29E-12              | 5.65E-14              | 4.83E-14              | 1.61E-15              | 3.21E-17             | 3.21E-17 | 3.21E-17                           | 3.21E-17                            | 1.29E-16              |
| 760      | 900   | 3.22E-17 | 4.28E-15 | 6.79E-15 | 3.22E-17 | 9.66E-17 | 3.22E-17 | 7.08E-16 | 3.65E-13              | 1.25E-13              | 1.97E-12              | 3.31E-14              | 2.50E-14              | 9.01E-16              | 3.22E-17             | 3.22E-17 | 3.22E-17                           | 3.22E-17                            | 9.66E-17              |
| 760      | 1000  | 3.23E-17 | 1.91E-15 | 5.00E-15 | 3.23E-17 | 3.23E-17 | 3.23E-17 | 5.81E-16 | 5.99E-13              | 1.86E-13              | 2.86E-12              | 2.06E-14              | 1.47E-14              | 7.43E-16              | 3.23E-17             | 3.23E-17 | 3.23E-17                           | 3.23E-17                            | 4.84E-16              |
| 760      | 1100  | 3.24E-17 | 1.23E-15 | 2.59E-15 | 1.30E-16 | 3.24E-17 | 3.24E-17 | 3.89E-16 | 8.94E-13              | 2.71E-13              | 4.00E-12              | 1.47E-14              | 8.95E-15              | 3.89E-16              | 3.24E-17             | 3.24E-17 | 3.24E-17                           | 3.24E-17                            | 6.49E-16              |
| 760      | 1200  | 3.26E-17 | 7.49E-16 | 1.21E-15 | 6.51E-17 | 3.26E-17 | 3.26E-17 | 3.26E-17 | 1.30E-12              | 3.77E-13              | 5.36E-12              | 9.64E-15              | 5.47E-15              | 2.93E-16              | 3.26E-17             | 3.26E-17 | 3.26E-17                           | 3.26E-17                            | 7.81E-16              |
| 760      | 1300  | 3.27E-17 | 5.89E-16 | 6.22E-16 | 9.82E-17 | 3.27E-17 | 3.27E-17 | 1.31E-16 | 1.80E-12              | 5.12E-13              | 7.02E-12              | 7.04E-15              | 3.27E-15              | 1.64E-16              | 9.82E-17             | 3.27E-17 | 3.27E-17                           | 3.27E-17                            | 7.53E-16              |
| 760      | 1400  | 3.30E-17 | 2.64E-16 | 1.32E-16 | 3.30E-17 | 3.30E-17 | 3.30E-17 | 3.30E-17 | 2.44E-12              | 6.85E-13              | 8.96E-12              | 6.03E-15              | 2.31E-15              | 1.65E-16              | 1.32E-16             | 3.30E-17 | 3.30E-17                           | 3.30E-17                            | 7.91E-16              |
| 760      | 1500  | 3.32E-17 | 2.99E-16 | 3.32E-17 | 3.32E-17 | 3.32E-17 | 3.32E-17 | 3.32E-17 | 3.20E-12              | 8.83E-13              | 1.12E-11              | 4.75E-15              | 1.93E-15              | 2.33E-16              | 2.33E-16             | 3.32E-17 | 3.32E-17                           | 3.32E-17                            | 7.31E-16              |
| 760      | 1600  | 3.35E-17 | 1.34E-16 | 3.35E-17 | 3.35E-17 | 3.35E-17 | 3.35E-17 | 3.35E-17 | 4.08E-12              | 1.14E-12              | 1.38E-11              | 4.16E-15              | 1.85E-15              | 1.34E-16              | 1.68E-16             | 3.35E-17 | 3.35E-17                           | 3.35E-17                            | 7.71E-16              |
| 760      | 1700  | 3.39E-17 | 5.13E-12              | 1.43E-12              | 1.67E-11              | 4.30E-15              | 1.76E-15              | 2.37E-16              | 1.69E-16             | 3.39E-17 | 6.77E-17                           | 3.39E-17                            | 6.43E-16              |
| 760      | 1800  | 3.42E-17 | 6.29E-12              | 1.78E-12              | 2.00E-11              | 3.53E-15              | 1.88E-15              | 1.37E-16              | 6.85E-17             | 3.42E-17 | 3.42E-17                           | 3.42E-17                            | 4.11E-16              |
| 760      | 1900  | 3.47E-17 | 7.65E-12              | 2.17E-12              | 2.36E-11              | 2.63E-15              | 1.35E-15              | 1.39E-16              | 3.47E-17             | 3.47E-17 | 3.47E-17                           | 3.47E-17                            | 3.47E-16              |
| 760      | 2000  | 3.52E-17 | 9.19E-12              | 2.64E-12              | 2.76E-11              | 2.81E-15              | 1.48E-15              | 1.06E-16              | 2.46E-16             | 3.52E-17 | 3.52E-17                           | 3.52E-17                            | 1.76E-16              |

Table S5. Individual rate constants  $k(T, P)$  for “ $P5 + O_2 \rightarrow Products$ ” at  $P = 760$  Torr for the temperature range of 200 - 400 K. Units:  $\text{cm}^3 \text{molecule}^{-1} \text{s}^{-1}$ .

| P [Torr] | T [K] | IM7      | IM8      | IM9      | P12+HO <sub>2</sub> | P13      | P14      | P15+HO <sub>2</sub> |
|----------|-------|----------|----------|----------|---------------------|----------|----------|---------------------|
| 760      | 200   | 1.14E-11 | 4.56E-19 | 4.56E-19 | 4.56E-19            | 4.56E-19 | 4.56E-19 | 4.56E-19            |
| 760      | 250   | 8.39E-12 | 3.36E-19 | 3.36E-19 | 3.36E-19            | 3.36E-19 | 3.36E-19 | 3.36E-19            |
| 760      | 300   | 6.84E-12 | 2.74E-19 | 2.74E-19 | 2.74E-19            | 2.74E-19 | 2.74E-19 | 2.74E-19            |
| 760      | 350   | 5.91E-12 | 2.36E-19 | 2.36E-19 | 2.36E-19            | 2.36E-19 | 2.36E-19 | 2.36E-19            |
| 760      | 400   | 5.3E-12  | 2.12E-19 | 2.12E-19 | 4.24E-19            | 2.12E-19 | 2.12E-19 | 2.12E-19            |

Table S6. Individual rate constants  $k(T, P)$  for “ $P5 \rightarrow Products$ ” decomposition at  $P = 760$  Torr for the temperature range of 200 - 400 K. Unit:  $s^{-1}$ .

| <b>P [Torr]</b> | <b>T [K]</b> | <b>IM10</b> | <b>P16+H</b> | <b>P17+H</b> | <b>P18+C<sub>3</sub>H<sub>6</sub></b> | <b>P19+P20</b> |
|-----------------|--------------|-------------|--------------|--------------|---------------------------------------|----------------|
| 760             | 200          | 3.07E-14    | 6.15E-22     | 6.15E-22     | 6.15E-22                              | 6.15E-22       |
| 760             | 250          | 2.16E-10    | 4.32E-18     | 4.32E-18     | 8.04E-16                              | 4.32E-18       |
| 760             | 300          | 1.68E-07    | 3.36E-15     | 1.68E-14     | 4.93E-11                              | 1.21E-13       |
| 760             | 350          | 3.13E-05    | 6.33E-13     | 1.56E-10     | 1.38E-07                              | 1.39E-09       |
| 760             | 400          | 1.97E-03    | 6.67E-10     | 9.22E-08     | 5.36E-05                              | 1.54E-06       |

Table S7. Individual rate constants  $k(T, P)$  for “ $IM7 + NO \rightarrow Products$ ” at  $P = 760$  Torr for the temperature range of 200 - 400 K. Units:  $cm^3$  molecule<sup>-1</sup> s<sup>-1</sup>.

| <b>P [Torr]</b> | <b>T [K]</b> | <b>IM11</b> | <b>IM12+NO<sub>2</sub></b> |
|-----------------|--------------|-------------|----------------------------|
| 760             | 200          | 7.83E-11    | 7.24E-13                   |
| 760             | 250          | 6.15E-11    | 6.34E-12                   |
| 760             | 300          | 2.57E-11    | 3.50E-11                   |
| 760             | 350          | 9.36E-13    | 5.48E-11                   |
| 760             | 400          | 9.77E-14    | 5.20E-11                   |



Table S8. Estimated branching ratios for “ $VB + OH \rightarrow products$ ” reactions at  $P = 760$  Torr for the temperature range of 200 - 2000 K

| T [K] | RC  | IM1 | IM2 | IM3 | IM4 | IM5 | IM6 | P1 + H <sub>2</sub> O | P2 + H <sub>2</sub> O | P3 + H <sub>2</sub> O | P4 + H <sub>2</sub> O | P5 + H <sub>2</sub> O | P6 + H <sub>2</sub> O | P7 + CH <sub>3</sub> | P8 + H | P9 + C <sub>3</sub> H <sub>6</sub> | P10 + C <sub>2</sub> H <sub>4</sub> | P11 + CH <sub>3</sub> |
|-------|-----|-----|-----|-----|-----|-----|-----|-----------------------|-----------------------|-----------------------|-----------------------|-----------------------|-----------------------|----------------------|--------|------------------------------------|-------------------------------------|-----------------------|
| 200   | 0.1 | 0.0 | 0.0 | 0.0 | 0.0 | 0.0 | 0.0 | 0.0                   | 0.0                   | 0.0                   | 0.2                   | 0.7                   | 0.0                   | 0.0                  | 0.0    | 0.0                                | 0.0                                 | 0.0                   |
| 298   | 0.0 | 0.0 | 0.0 | 0.0 | 0.0 | 0.0 | 0.0 | 0.0                   | 0.0                   | 0.0                   | 0.2                   | 0.7                   | 0.0                   | 0.0                  | 0.0    | 0.0                                | 0.0                                 | 0.0                   |
| 300   | 0.0 | 0.0 | 0.0 | 0.0 | 0.0 | 0.0 | 0.0 | 0.0                   | 0.0                   | 0.0                   | 0.2                   | 0.7                   | 0.0                   | 0.0                  | 0.0    | 0.0                                | 0.0                                 | 0.0                   |
| 400   | 0.0 | 0.0 | 0.1 | 0.0 | 0.0 | 0.0 | 0.0 | 0.0                   | 0.0                   | 0.0                   | 0.3                   | 0.6                   | 0.0                   | 0.0                  | 0.0    | 0.0                                | 0.0                                 | 0.0                   |
| 500   | 0.0 | 0.0 | 0.1 | 0.0 | 0.0 | 0.0 | 0.0 | 0.0                   | 0.0                   | 0.2                   | 0.3                   | 0.5                   | 0.0                   | 0.0                  | 0.0    | 0.0                                | 0.0                                 | 0.0                   |
| 600   | 0.0 | 0.0 | 0.0 | 0.0 | 0.0 | 0.0 | 0.0 | 0.0                   | 0.0                   | 0.4                   | 0.2                   | 0.2                   | 0.0                   | 0.0                  | 0.0    | 0.0                                | 0.0                                 | 0.0                   |
| 700   | 0.0 | 0.0 | 0.0 | 0.0 | 0.0 | 0.0 | 0.0 | 0.1                   | 0.0                   | 0.7                   | 0.1                   | 0.1                   | 0.0                   | 0.0                  | 0.0    | 0.0                                | 0.0                                 | 0.0                   |
| 800   | 0.0 | 0.0 | 0.0 | 0.0 | 0.0 | 0.0 | 0.0 | 0.1                   | 0.0                   | 0.8                   | 0.0                   | 0.0                   | 0.0                   | 0.0                  | 0.0    | 0.0                                | 0.0                                 | 0.0                   |
| 900   | 0.0 | 0.0 | 0.0 | 0.0 | 0.0 | 0.0 | 0.0 | 0.1                   | 0.0                   | 0.8                   | 0.0                   | 0.0                   | 0.0                   | 0.0                  | 0.0    | 0.0                                | 0.0                                 | 0.0                   |
| 1000  | 0.0 | 0.0 | 0.0 | 0.0 | 0.0 | 0.0 | 0.0 | 0.2                   | 0.1                   | 0.8                   | 0.0                   | 0.0                   | 0.0                   | 0.0                  | 0.0    | 0.0                                | 0.0                                 | 0.0                   |
| 1100  | 0.0 | 0.0 | 0.0 | 0.0 | 0.0 | 0.0 | 0.0 | 0.2                   | 0.1                   | 0.8                   | 0.0                   | 0.0                   | 0.0                   | 0.0                  | 0.0    | 0.0                                | 0.0                                 | 0.0                   |
| 1200  | 0.0 | 0.0 | 0.0 | 0.0 | 0.0 | 0.0 | 0.0 | 0.2                   | 0.1                   | 0.8                   | 0.0                   | 0.0                   | 0.0                   | 0.0                  | 0.0    | 0.0                                | 0.0                                 | 0.0                   |
| 1300  | 0.0 | 0.0 | 0.0 | 0.0 | 0.0 | 0.0 | 0.0 | 0.2                   | 0.1                   | 0.8                   | 0.0                   | 0.0                   | 0.0                   | 0.0                  | 0.0    | 0.0                                | 0.0                                 | 0.0                   |
| 1400  | 0.0 | 0.0 | 0.0 | 0.0 | 0.0 | 0.0 | 0.0 | 0.2                   | 0.1                   | 0.7                   | 0.0                   | 0.0                   | 0.0                   | 0.0                  | 0.0    | 0.0                                | 0.0                                 | 0.0                   |
| 1500  | 0.0 | 0.0 | 0.0 | 0.0 | 0.0 | 0.0 | 0.0 | 0.2                   | 0.1                   | 0.7                   | 0.0                   | 0.0                   | 0.0                   | 0.0                  | 0.0    | 0.0                                | 0.0                                 | 0.0                   |
| 1600  | 0.0 | 0.0 | 0.0 | 0.0 | 0.0 | 0.0 | 0.0 | 0.2                   | 0.1                   | 0.7                   | 0.0                   | 0.0                   | 0.0                   | 0.0                  | 0.0    | 0.0                                | 0.0                                 | 0.0                   |
| 1700  | 0.0 | 0.0 | 0.0 | 0.0 | 0.0 | 0.0 | 0.0 | 0.2                   | 0.1                   | 0.7                   | 0.0                   | 0.0                   | 0.0                   | 0.0                  | 0.0    | 0.0                                | 0.0                                 | 0.0                   |
| 1800  | 0.0 | 0.0 | 0.0 | 0.0 | 0.0 | 0.0 | 0.0 | 0.2                   | 0.1                   | 0.7                   | 0.0                   | 0.0                   | 0.0                   | 0.0                  | 0.0    | 0.0                                | 0.0                                 | 0.0                   |
| 1900  | 0.0 | 0.0 | 0.0 | 0.0 | 0.0 | 0.0 | 0.0 | 0.2                   | 0.1                   | 0.7                   | 0.0                   | 0.0                   | 0.0                   | 0.0                  | 0.0    | 0.0                                | 0.0                                 | 0.0                   |
| 2000  | 0.0 | 0.0 | 0.0 | 0.0 | 0.0 | 0.0 | 0.0 | 0.2                   | 0.1                   | 0.7                   | 0.0                   | 0.0                   | 0.0                   | 0.0                  | 0.0    | 0.0                                | 0.0                                 | 0.0                   |

Table S9. Estimated branching ratios for “ $P5 + O_2 \rightarrow products$ ” reactions at  $P = 760$  Torr for the temperature range of 200 - 400 K.

| P [Torr] | T [K] | IM7 | IM8 | IM9 | P12+HO <sub>2</sub> | P13 | P14 | P15+HO <sub>2</sub> |
|----------|-------|-----|-----|-----|---------------------|-----|-----|---------------------|
| 760      | 200   | 1.0 | 0.0 | 0.0 | 0.0                 | 0.0 | 0.0 | 0.0                 |
| 760      | 250   | 1.0 | 0.0 | 0.0 | 0.0                 | 0.0 | 0.0 | 0.0                 |
| 760      | 300   | 1.0 | 0.0 | 0.0 | 0.0                 | 0.0 | 0.0 | 0.0                 |
| 760      | 350   | 1.0 | 0.0 | 0.0 | 0.0                 | 0.0 | 0.0 | 0.0                 |
| 760      | 400   | 1.0 | 0.0 | 0.0 | 0.0                 | 0.0 | 0.0 | 0.0                 |

Table S10. Estimated branching ratios for each species of “ $IM7 + NO \rightarrow products$ ” reactions at  $P = 760$  Torr for the temperature range of 200 - 400 K.

| <b>P [Torr]</b> | <b>T [K]</b> | <b>IM11</b> | <b>IM12+NO<sub>2</sub></b> |
|-----------------|--------------|-------------|----------------------------|
| 760             | 200          | 1.0         | 0.0                        |
| 760             | 250          | 0.9         | 0.1                        |
| 760             | 300          | 0.4         | 0.6                        |
| 760             | 350          | 0.0         | 0.9                        |
| 760             | 400          | 0.0         | 0.9                        |

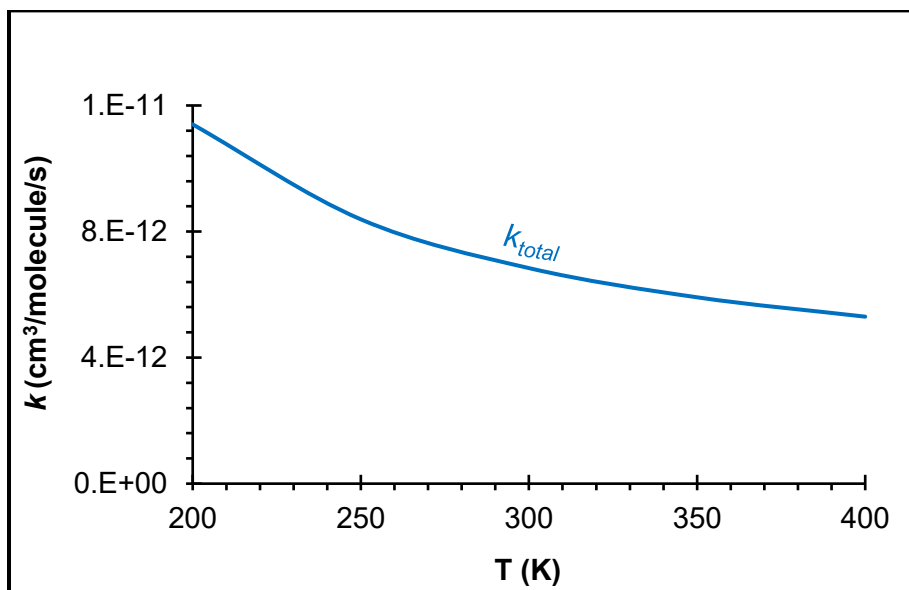

Figure S1. Estimated total rate constants for “ $P5 + O_2 \rightarrow products$ ” reactions at  $P = 760$  Torr for the temperature range of 200 - 400 K.

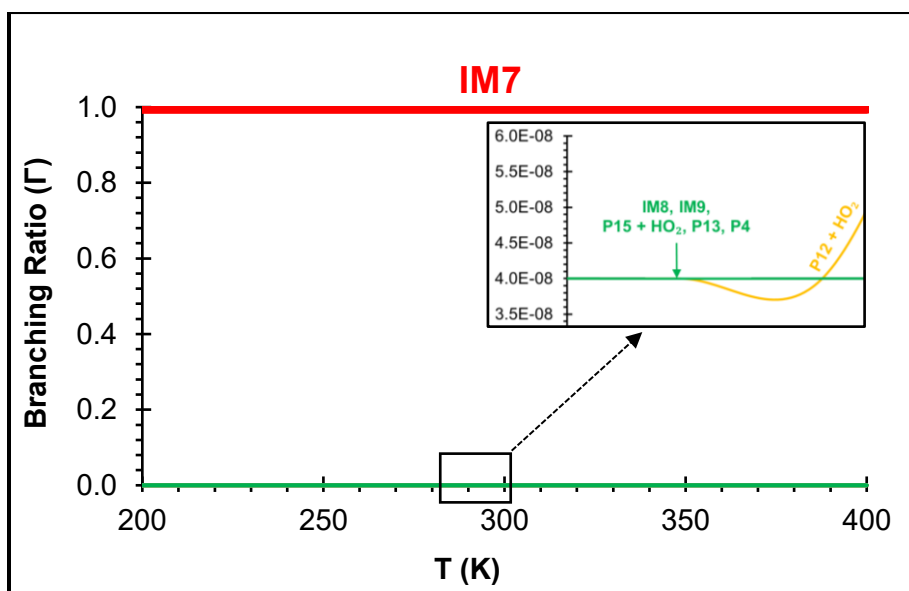

Figure S2: Branching ratios ( $\Gamma$ ) for the products formation of “ $P5 + O_2 \rightarrow products$ ” reactions at  $P = 760$  Torr for the temperature range of 200 - 400 K.

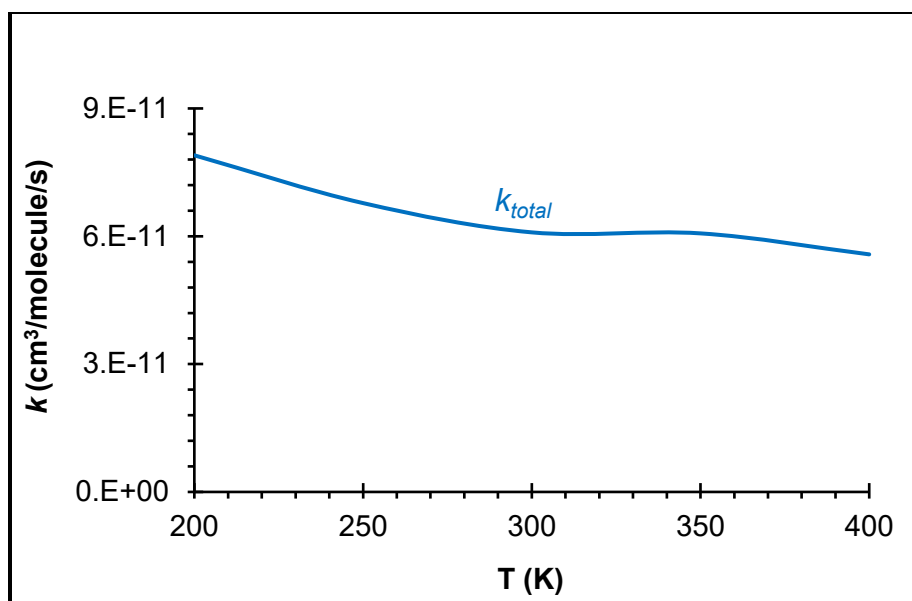

Figure S3. Estimated total rate constants for the “ $IM7 + NO \rightarrow products$ ” reactions at  $P = 760$  Torr for the temperature range of 200 - 400 K.

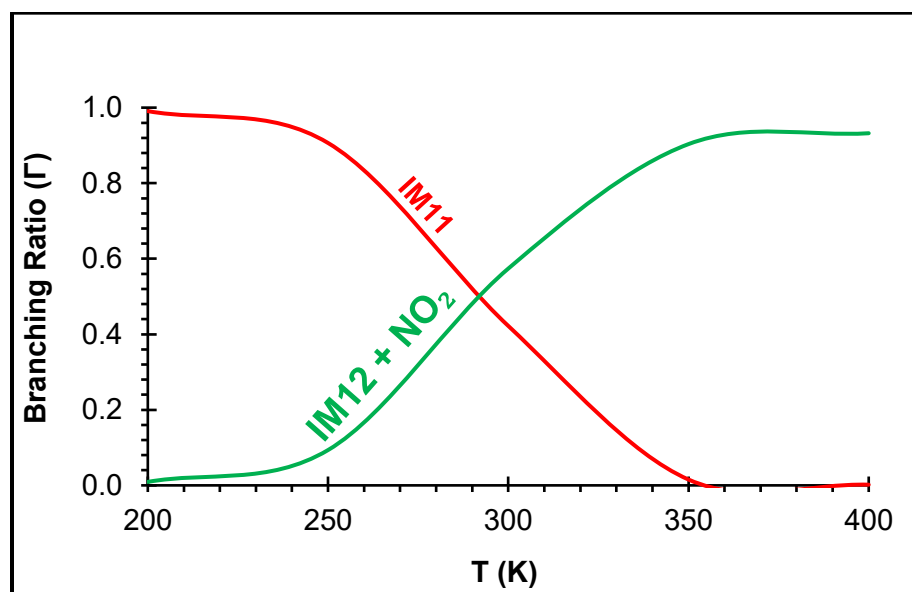

Figure S4: Branching ratios ( $\Gamma$ ) for the products formation of “ $IM7 + NO \rightarrow products$ ” reactions at  $P = 760$  Torr for the temperature range of 200 - 400 K.

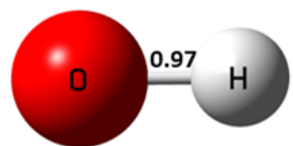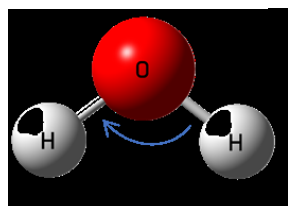

H<sub>2</sub>O

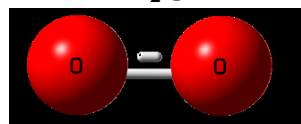

O<sub>2</sub>

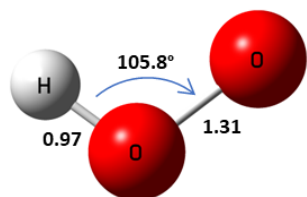

HO<sub>2</sub>

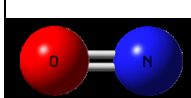

NO

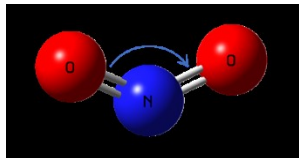

NO<sub>2</sub>

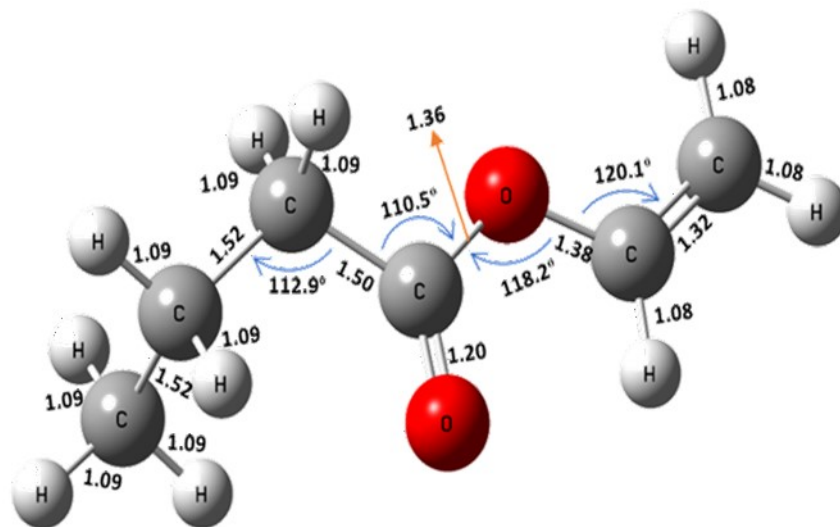

VB

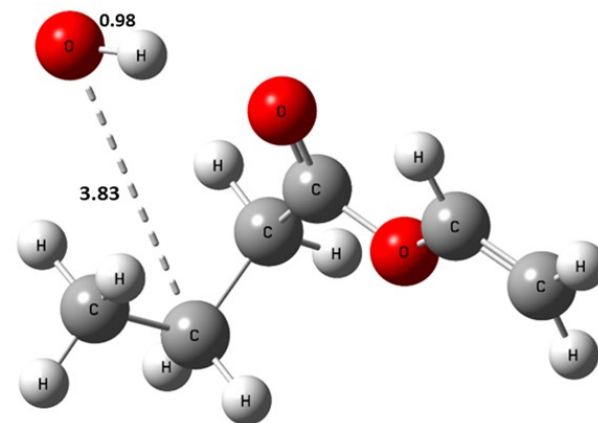

RC

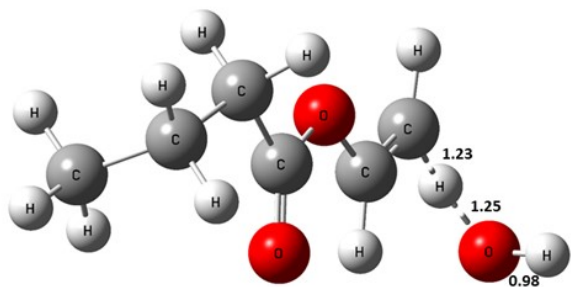

TS1

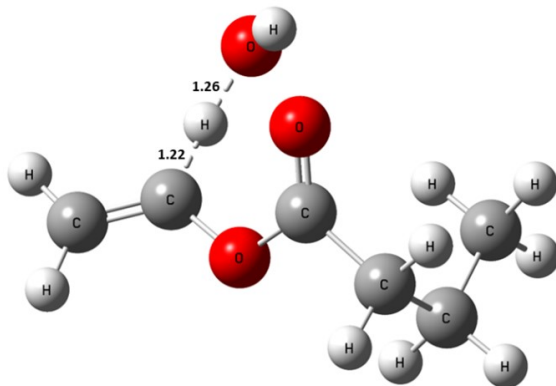

TS2

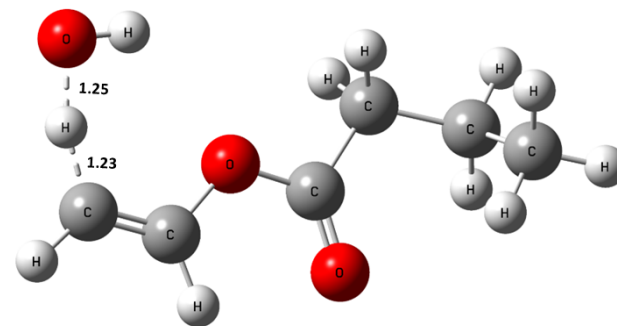

TS3

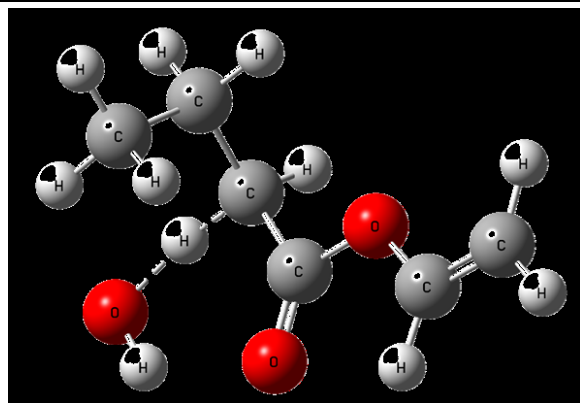

TS4

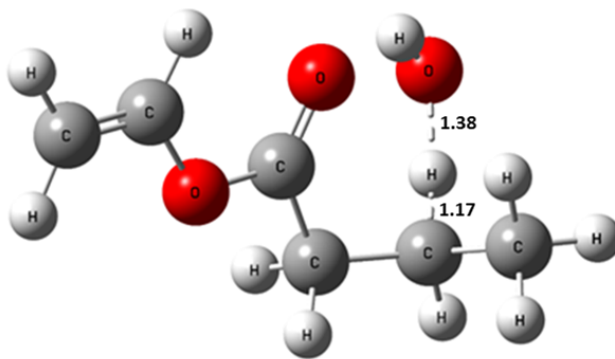

TS5

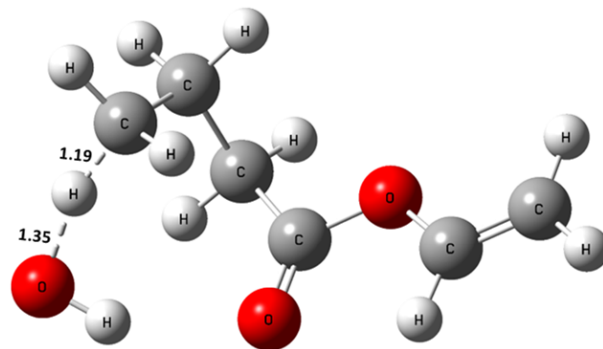

TS6

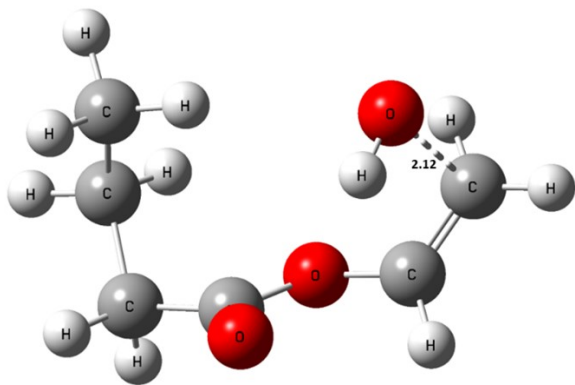

TS7

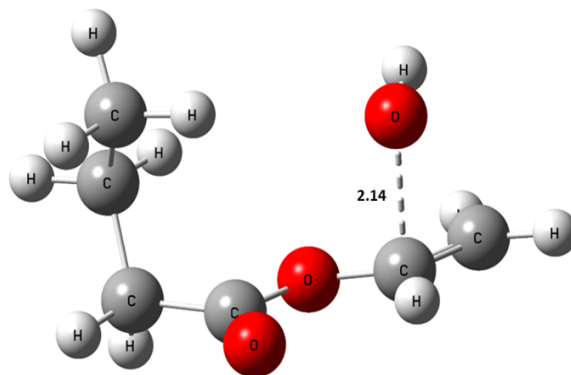

TS8

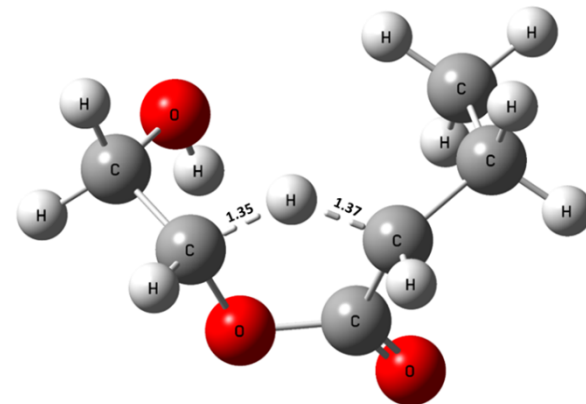

TS9

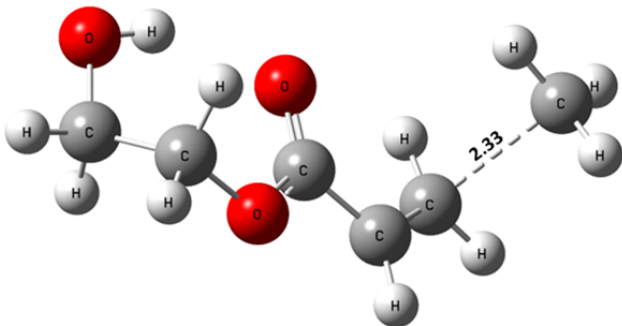

TS10

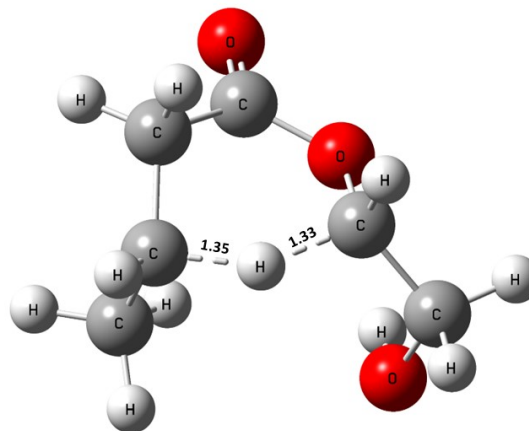

TS11

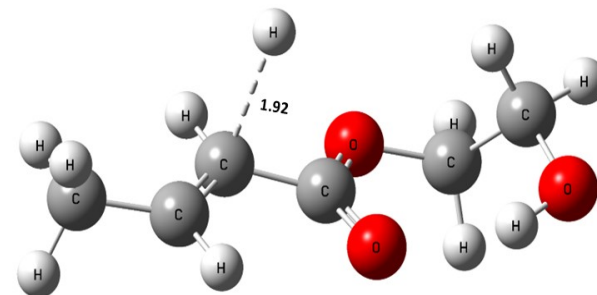

TS12

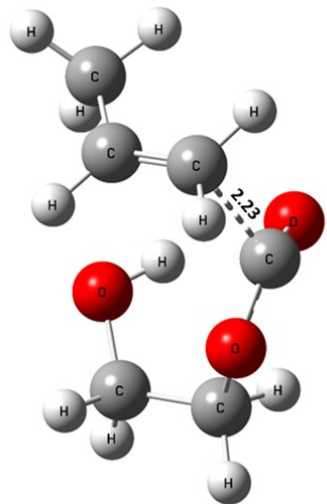

TS13

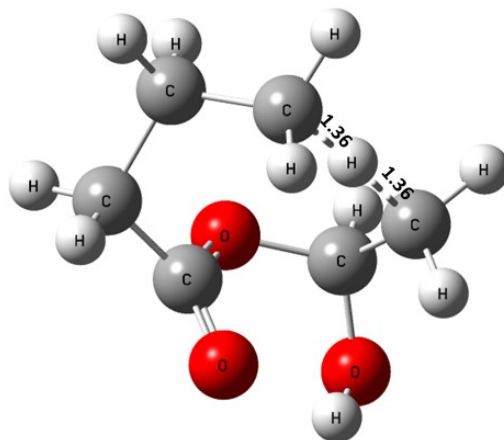

TS14

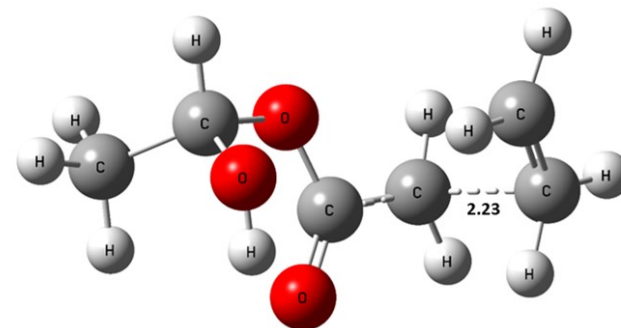

TS15

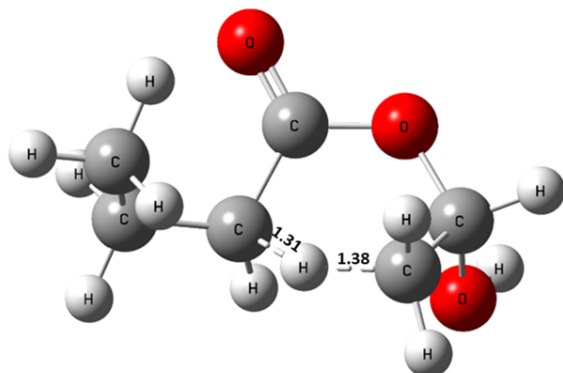

TS16

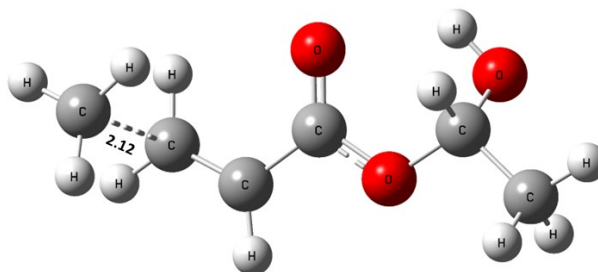

TS17

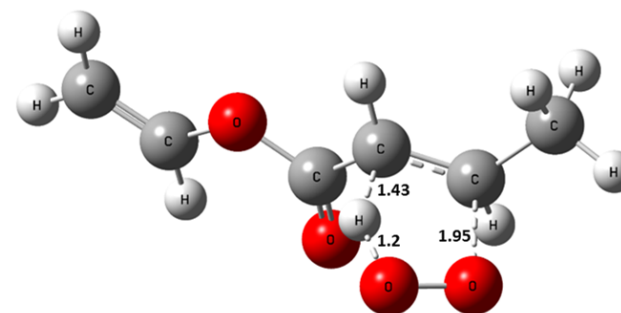

TS18



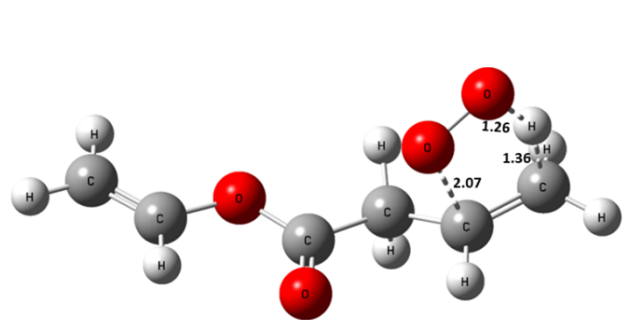

TS19

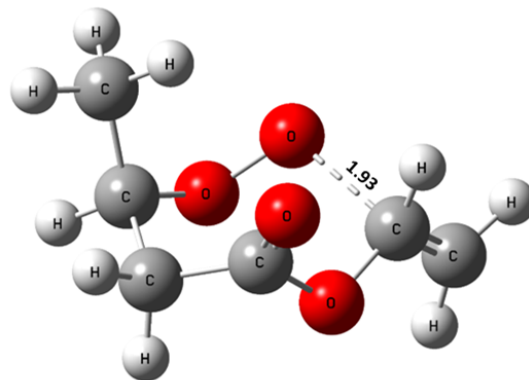

TS20

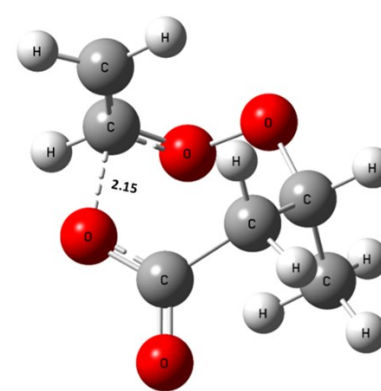

TS21

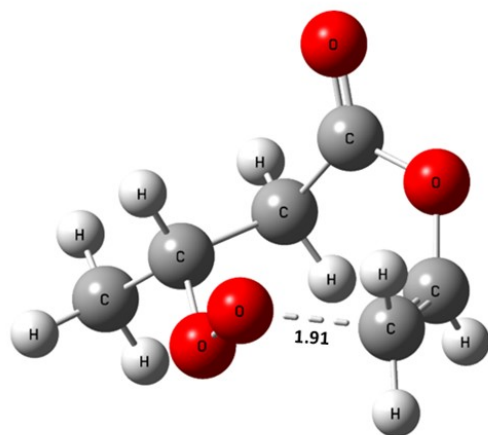

TS22

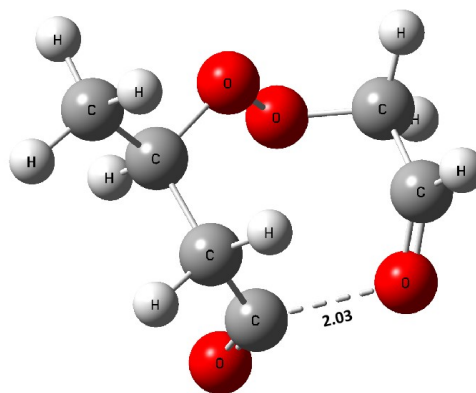

TS23

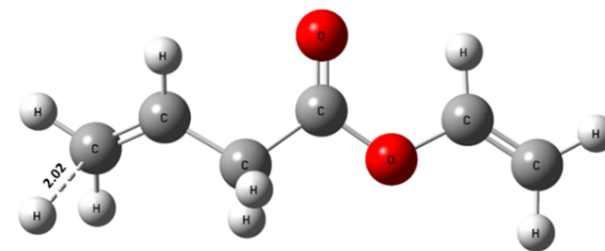

TS24

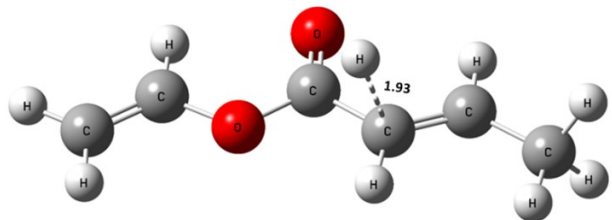

TS25

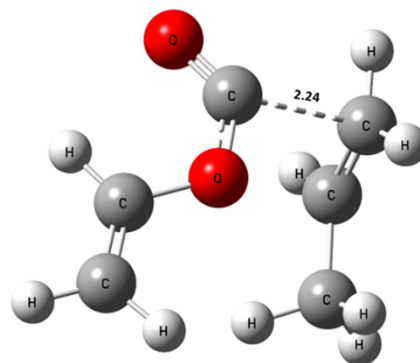

TS26

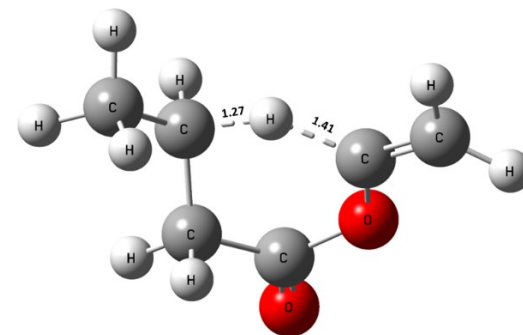

TS27

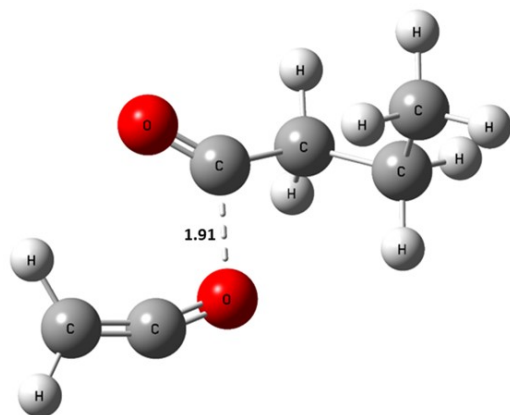

TS28

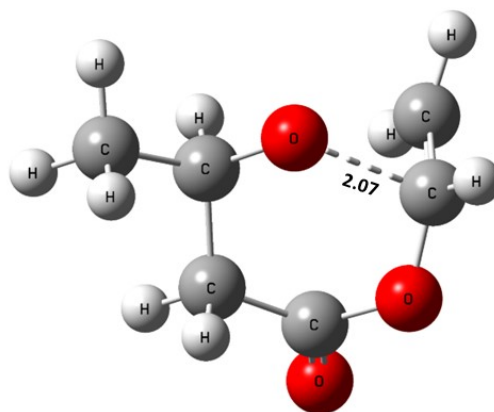

TS29

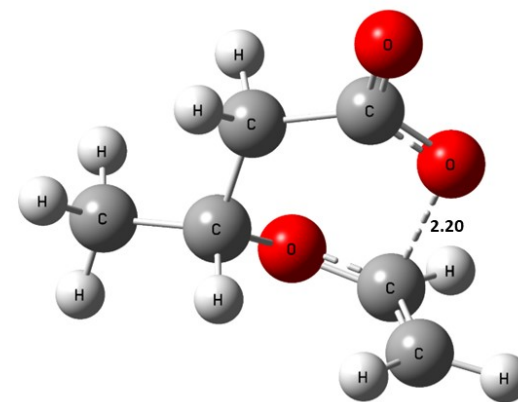

TS30

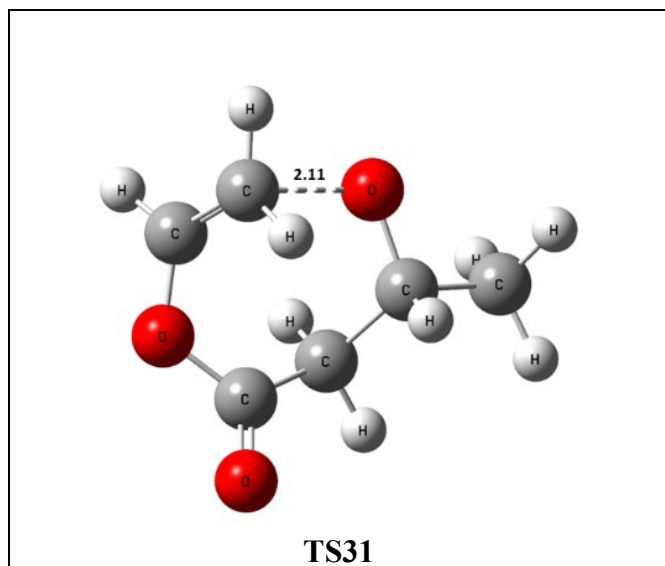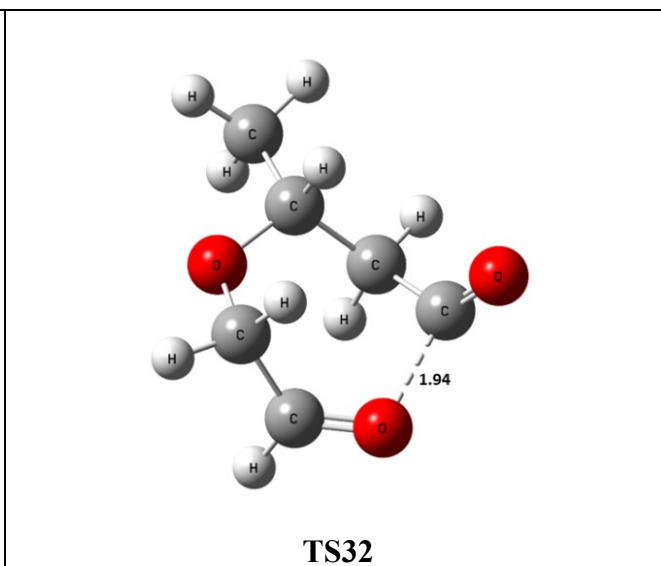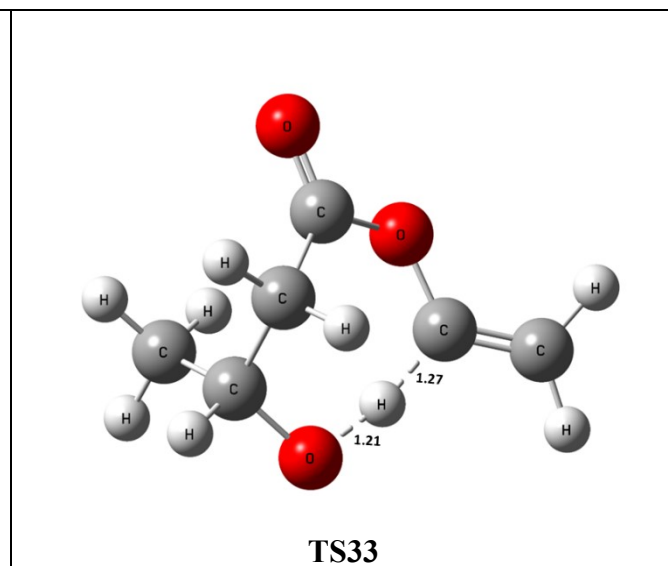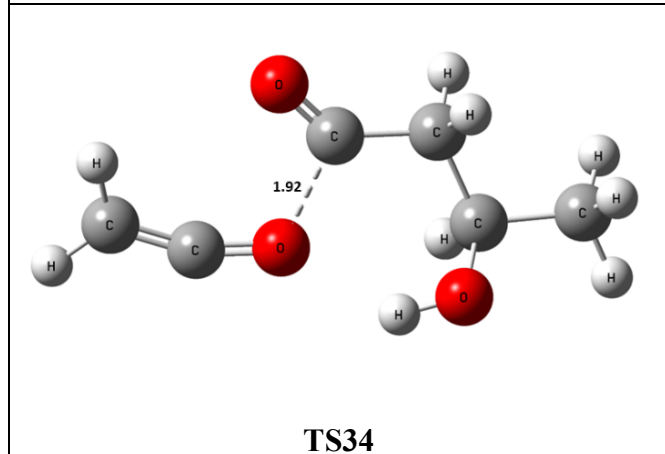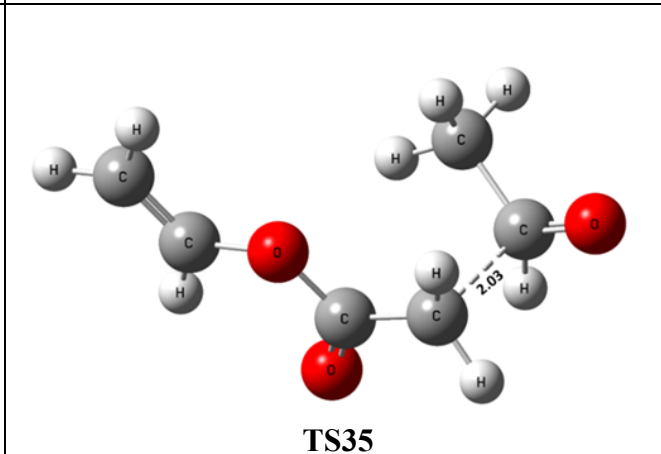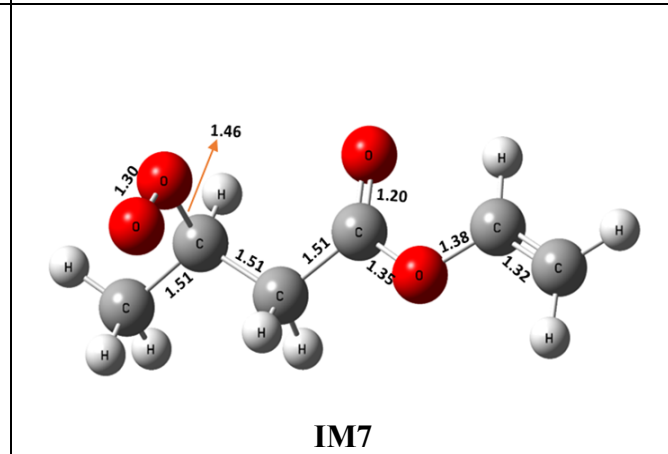

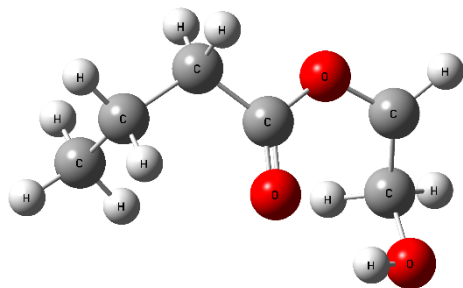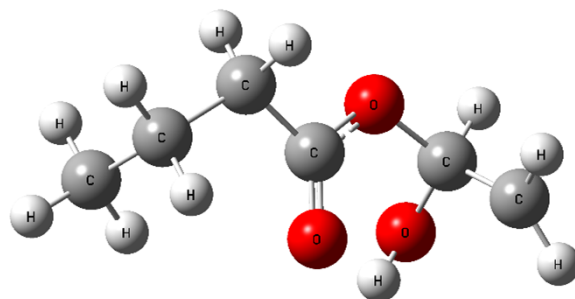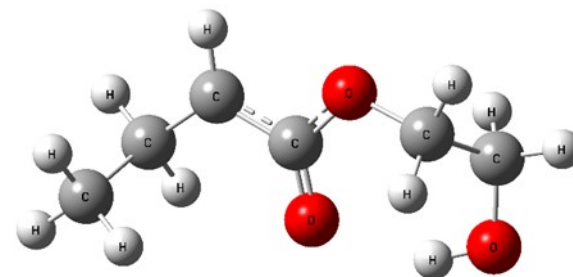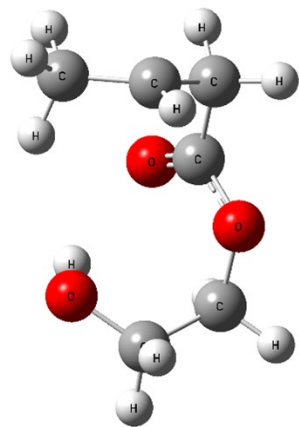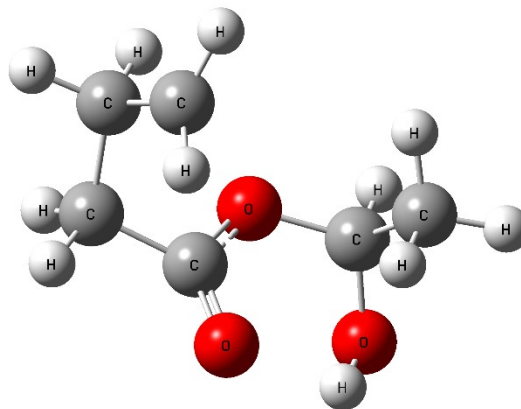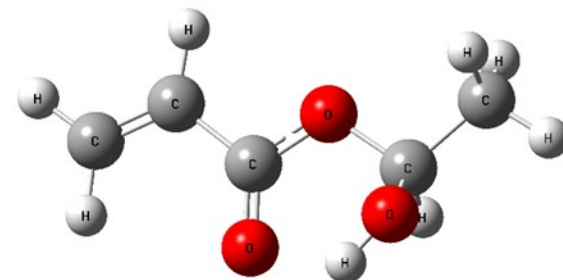

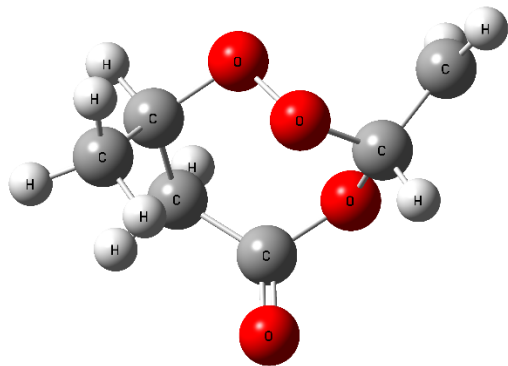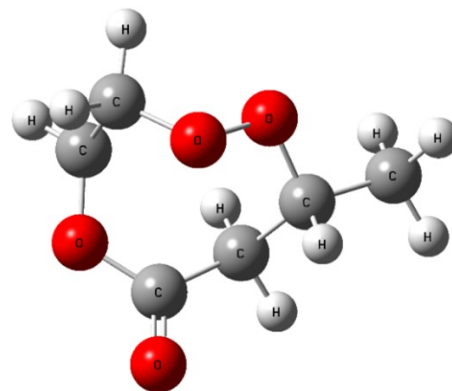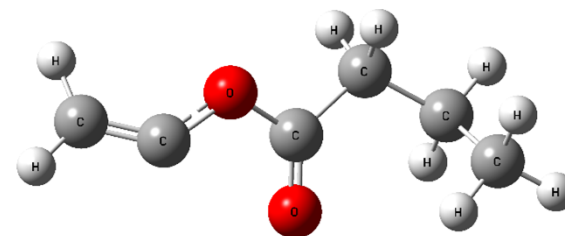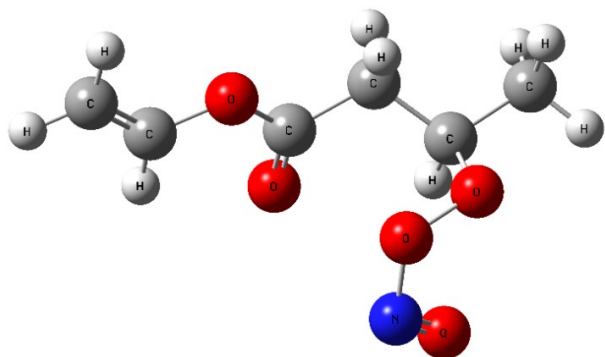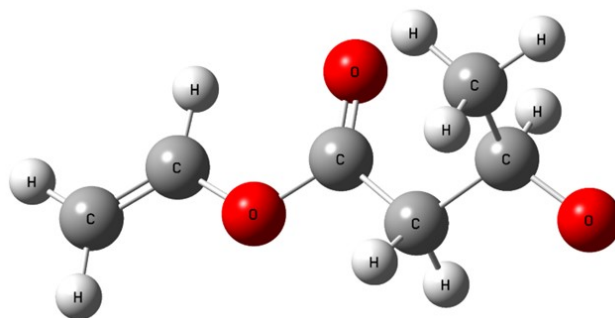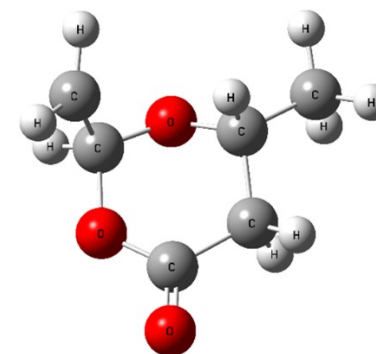

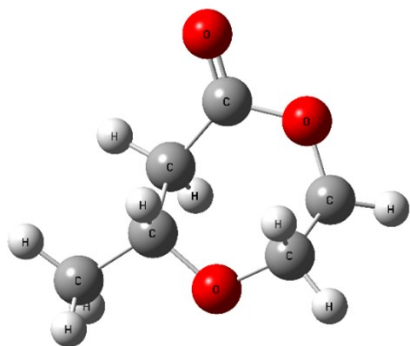

**IM14**

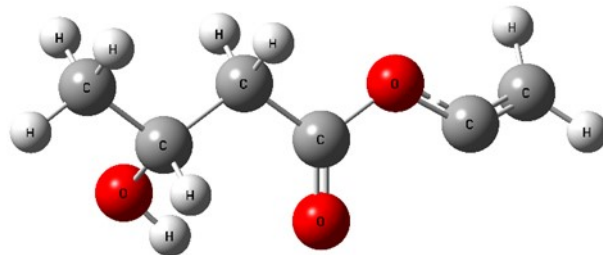

**IM15**

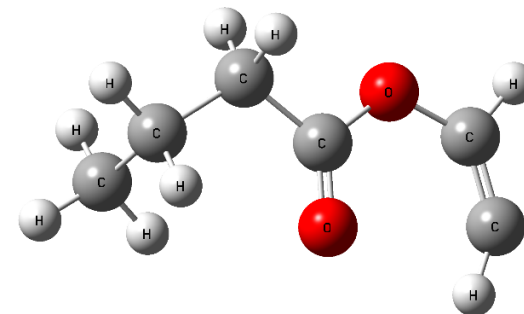

**P1**

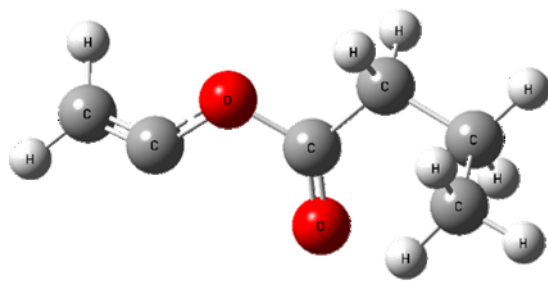

**P2**

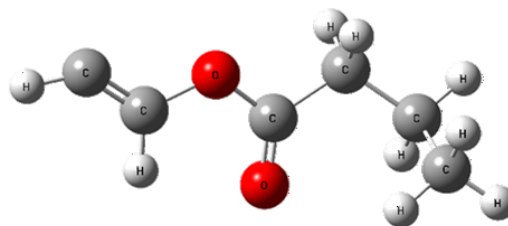

**P3**

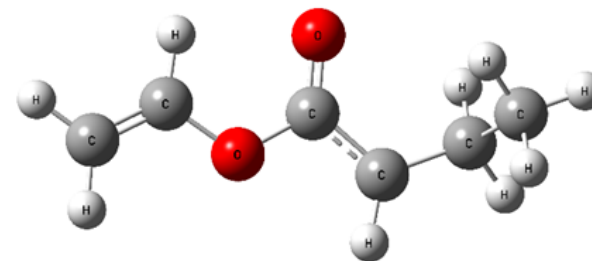

**P4**

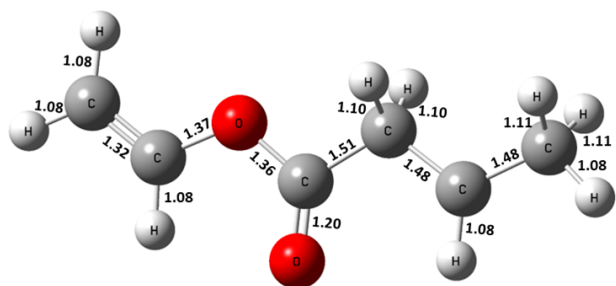

**P5**

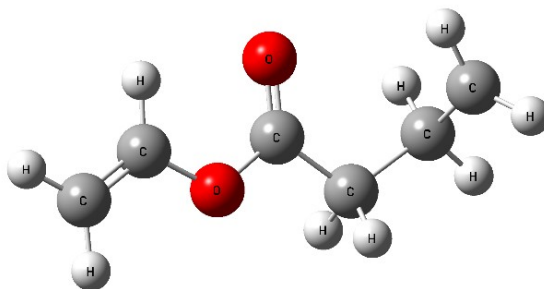

**P6**

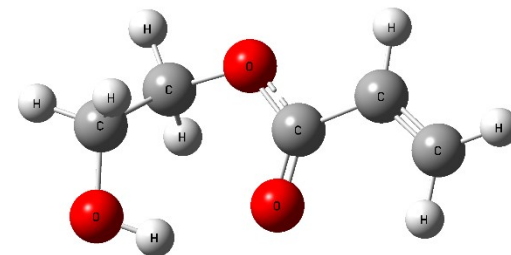

**P7**

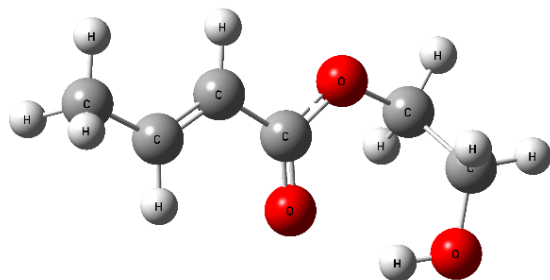

**P8**

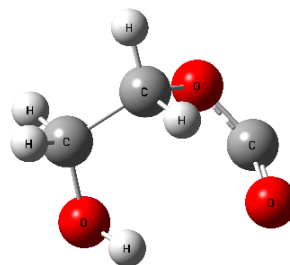

**P9**

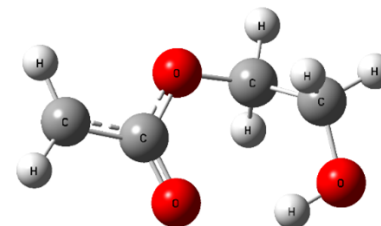

**P10**

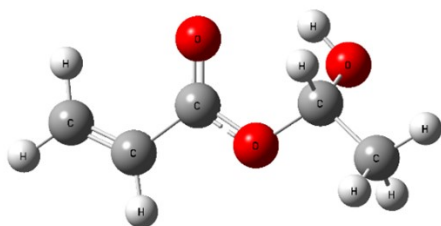

**P11**

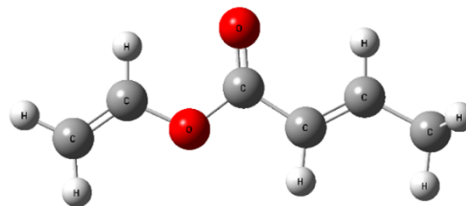

**P12**

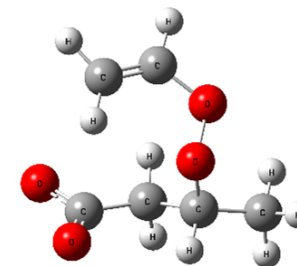

**P13**

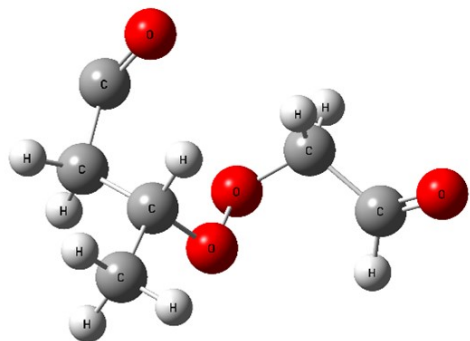

**P14**

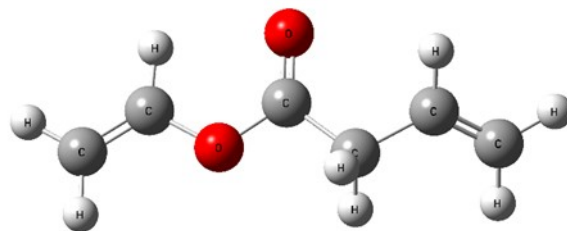

**P15**

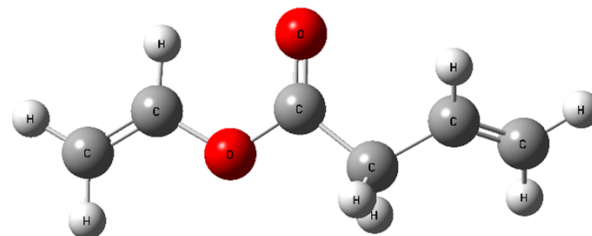

**P16**

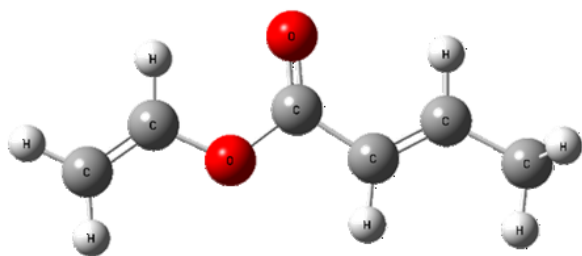

**P17**

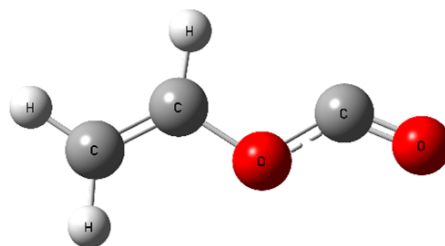

**P18**

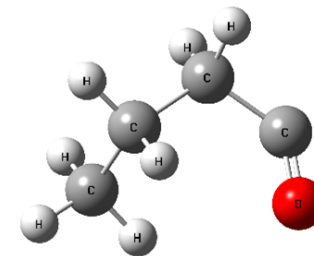

**P19**



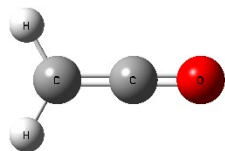

P20

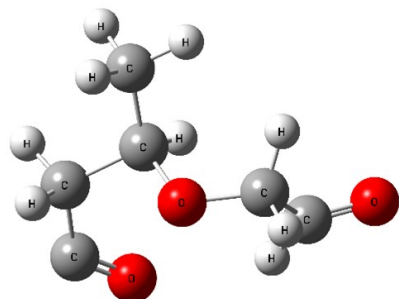

P21

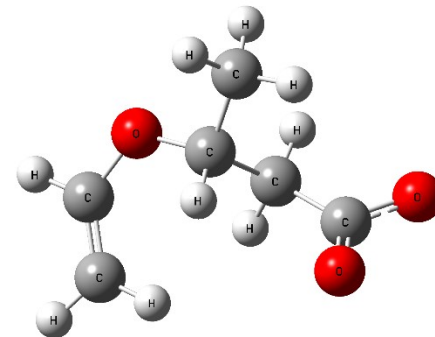

P22

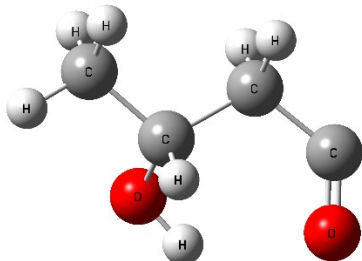

P23

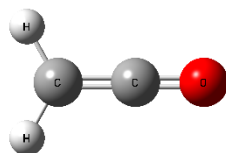

P24

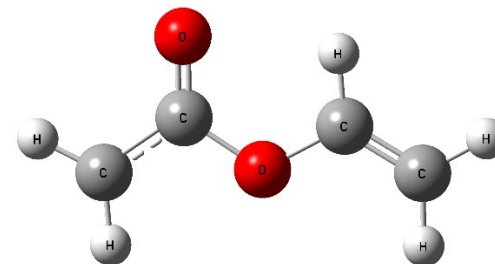

P25

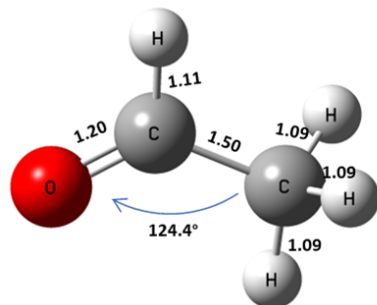

CH<sub>3</sub>CHO

Figure S5. Geometries for the species involved in the VB + OH/O<sub>2</sub>/NO/ reaction were optimized at M06-2X/aug-cc-pVTZ level. All structures were obtained for the lowest-energy conformer. Bond lengths and bond angles are in Å and degree (°), respectively.

### Species

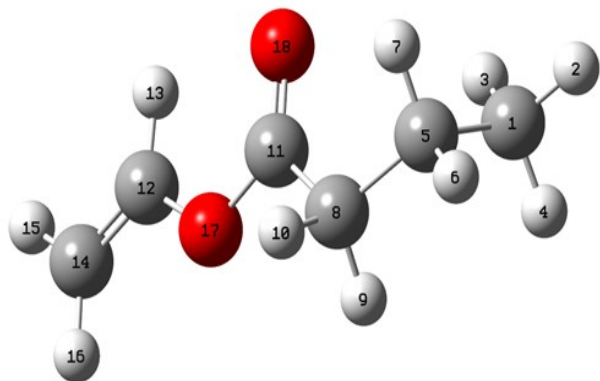

### VB

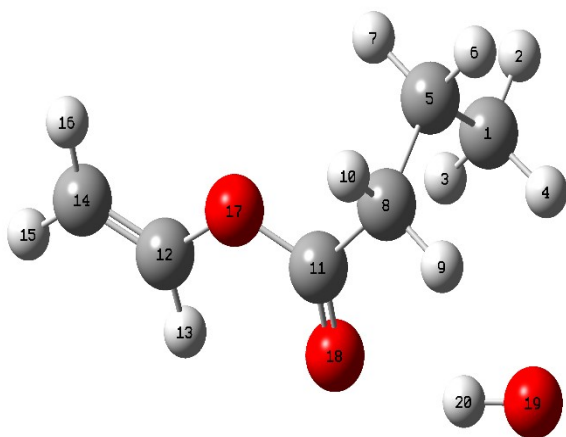

### RC

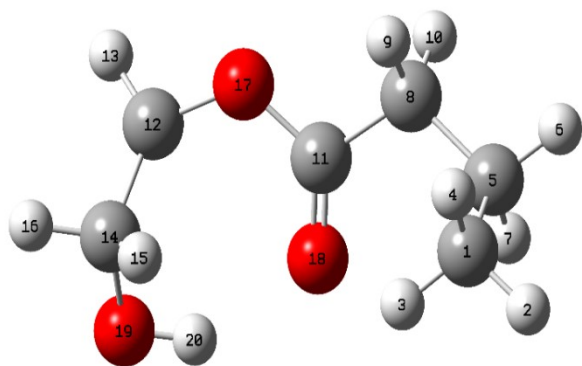

### IM1

### Hindrance Potentials

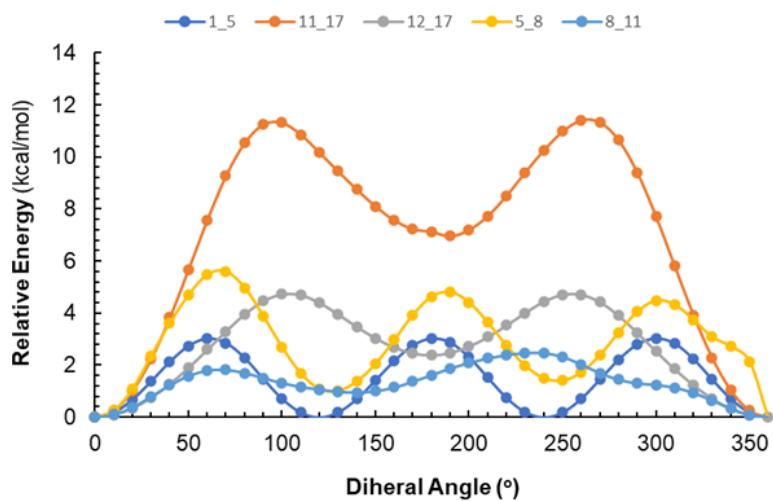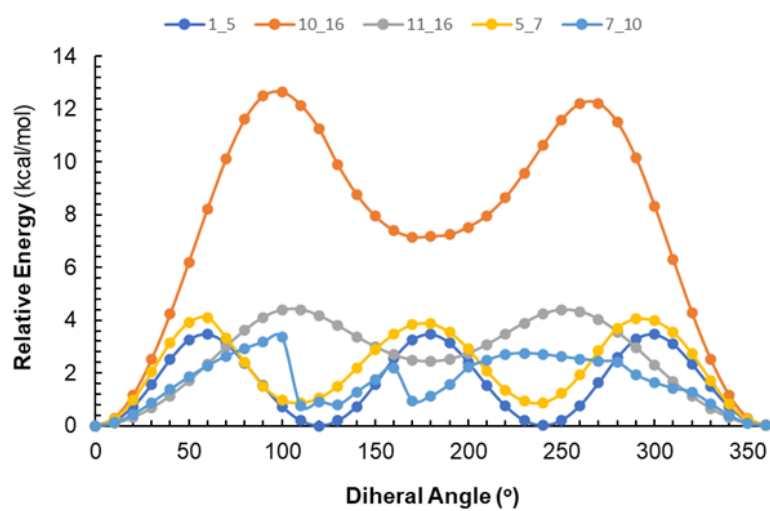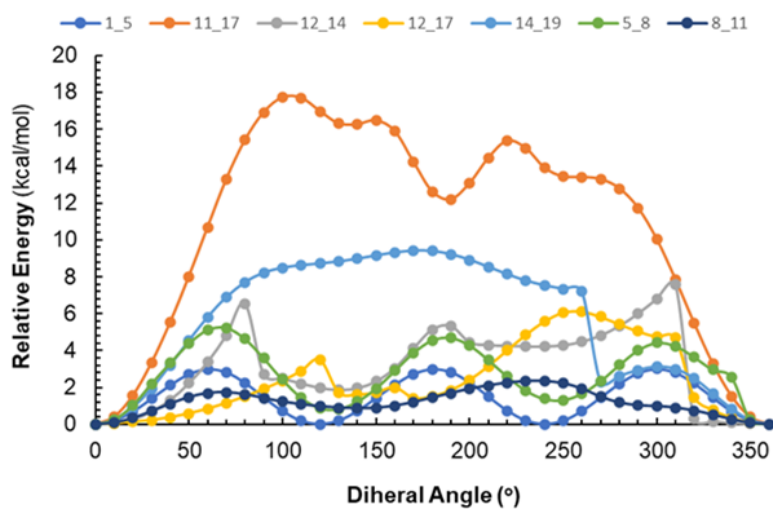

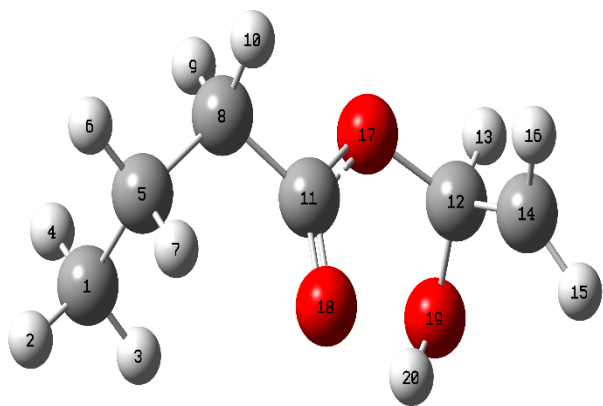

IM2

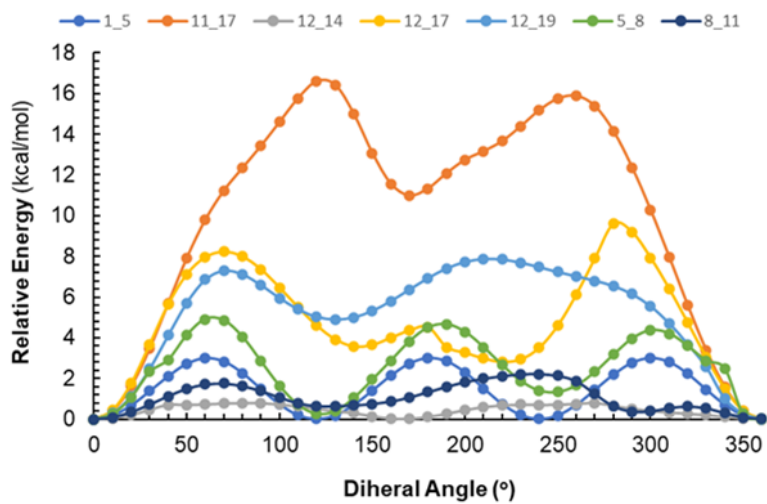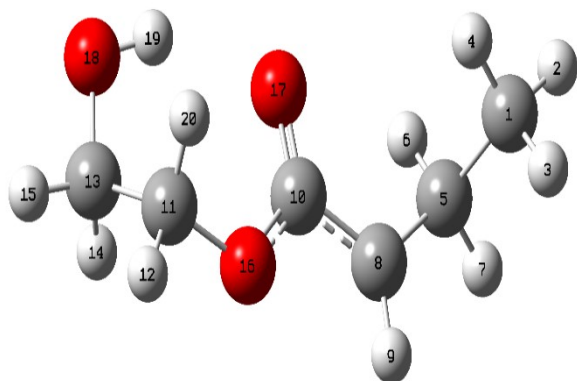

IM3

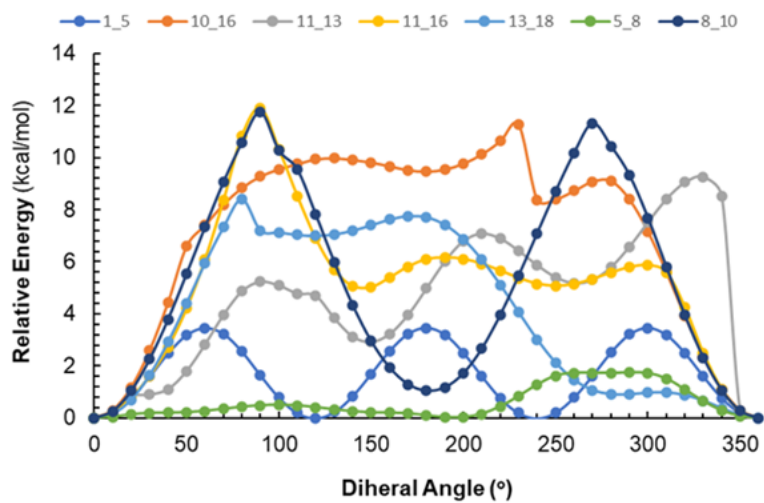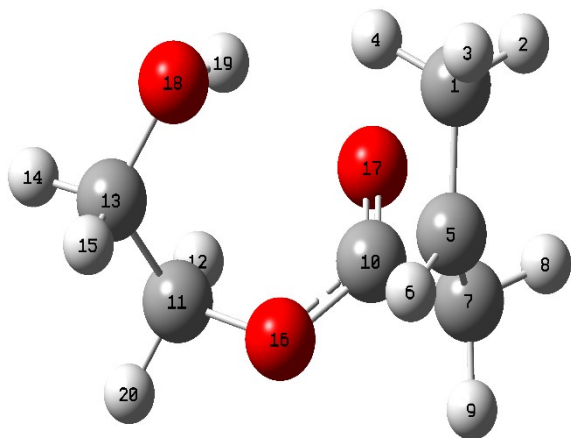

IM4

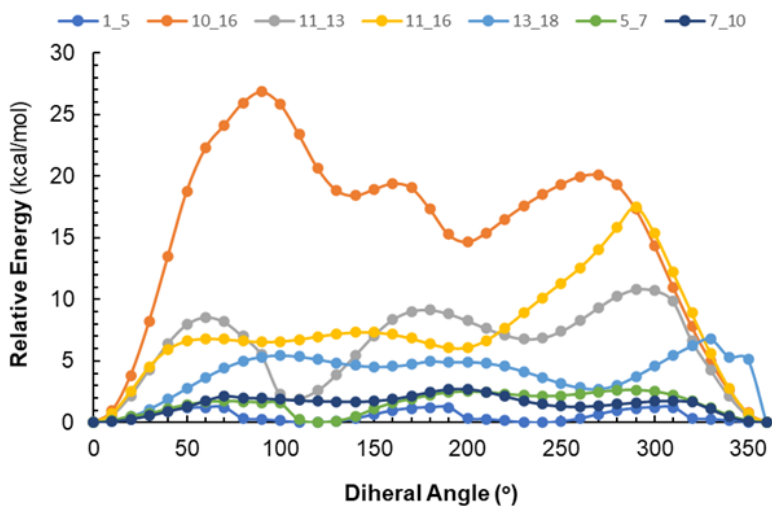

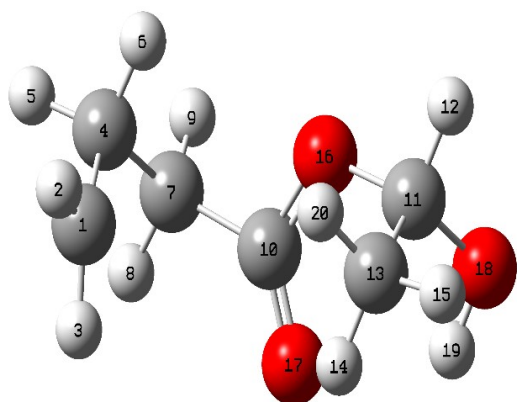

IM5

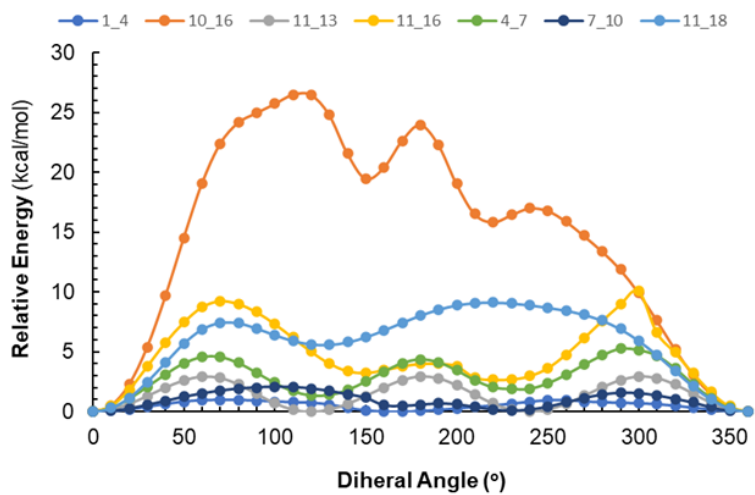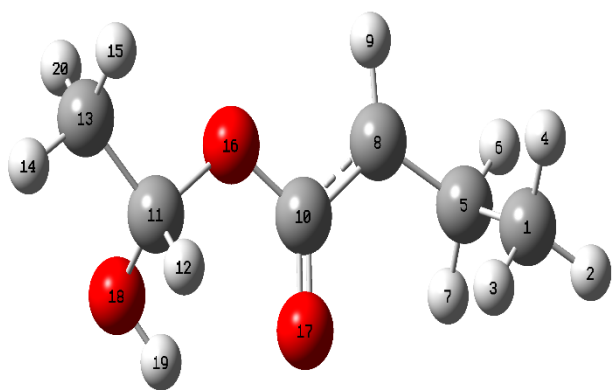

IM6

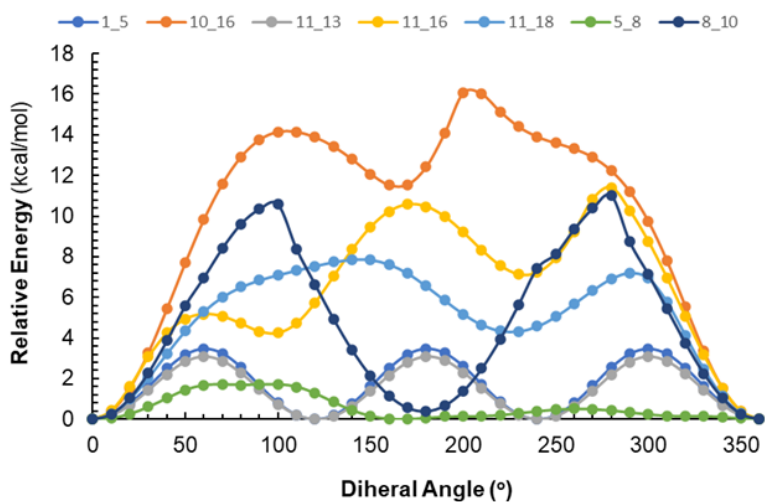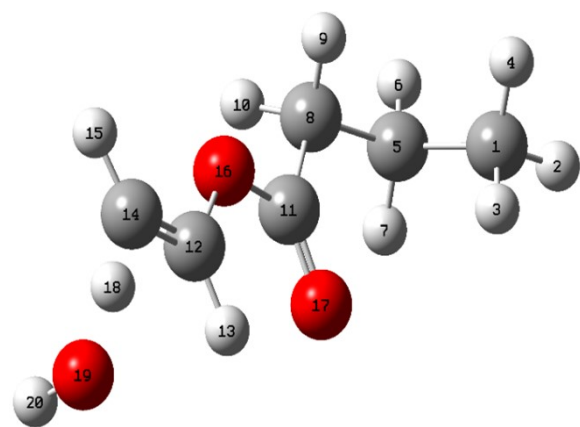

TS1

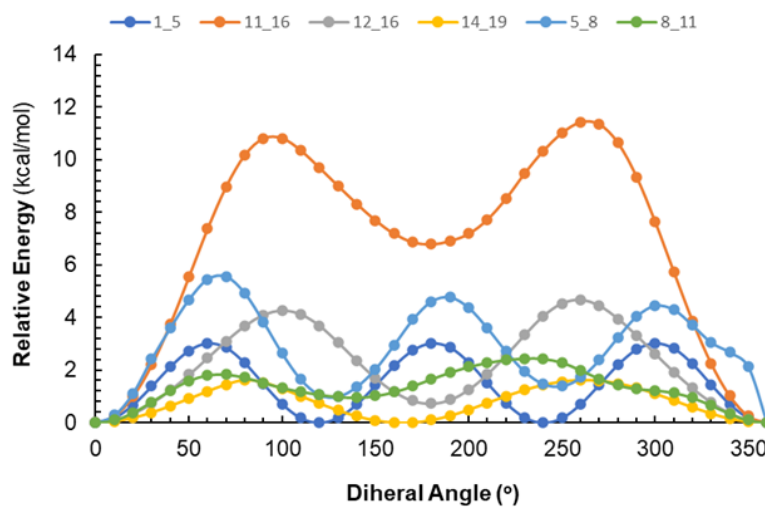

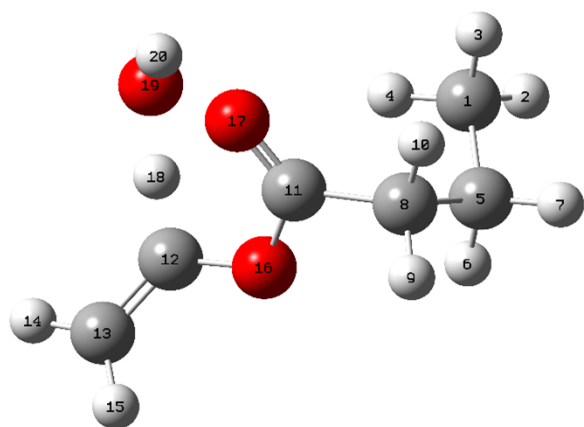

TS2

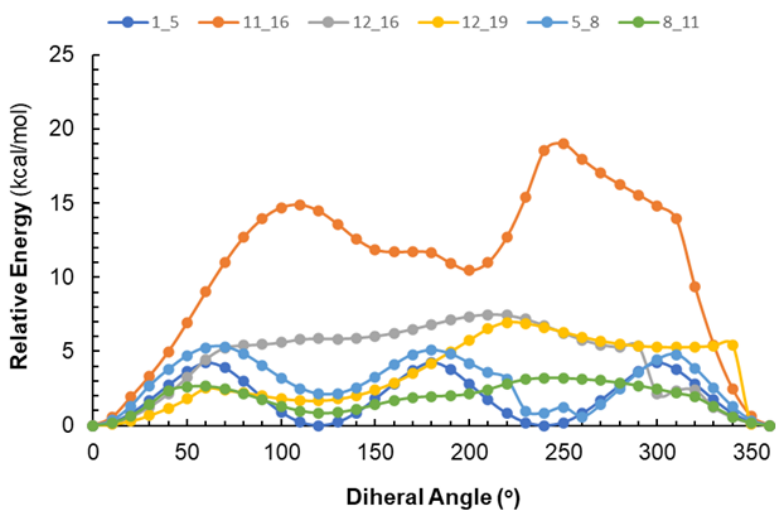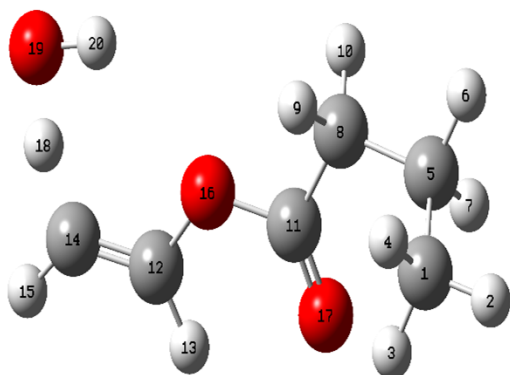

TS3

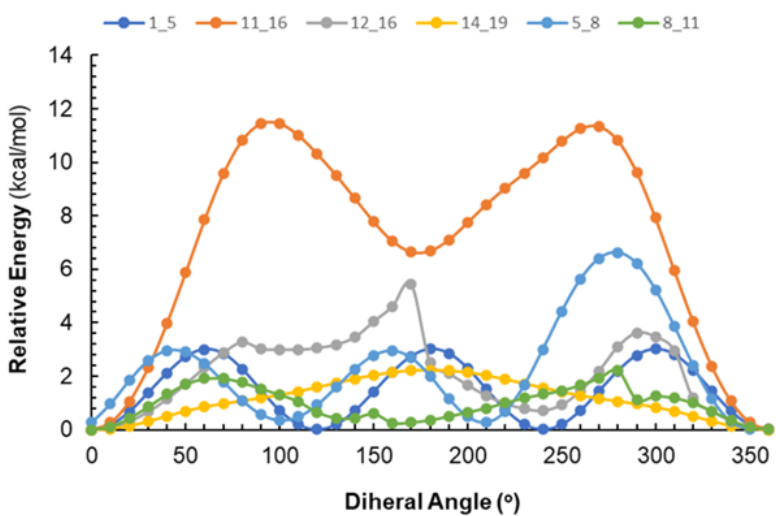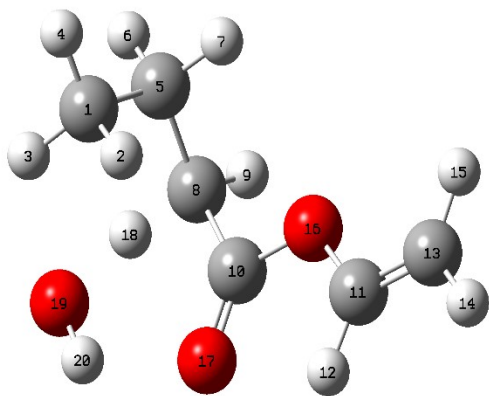

TS4

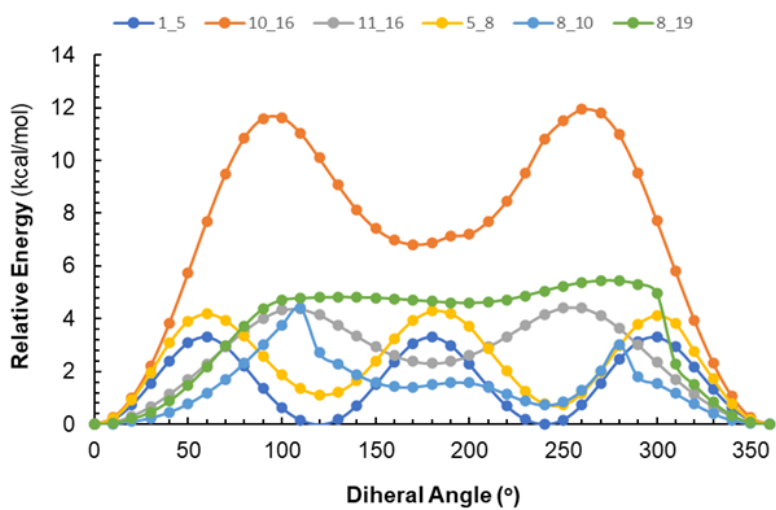

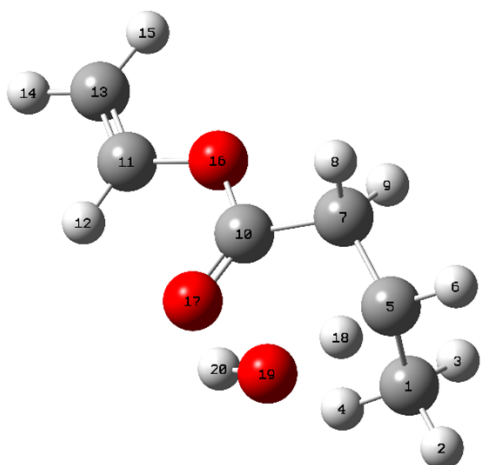

TS5

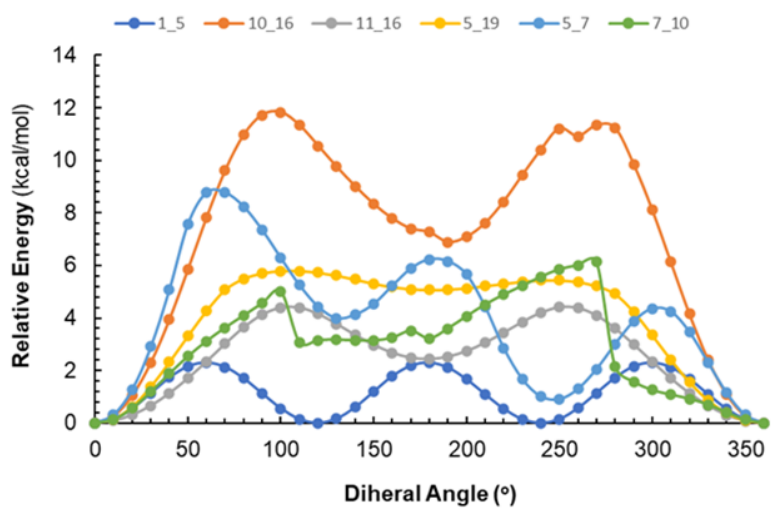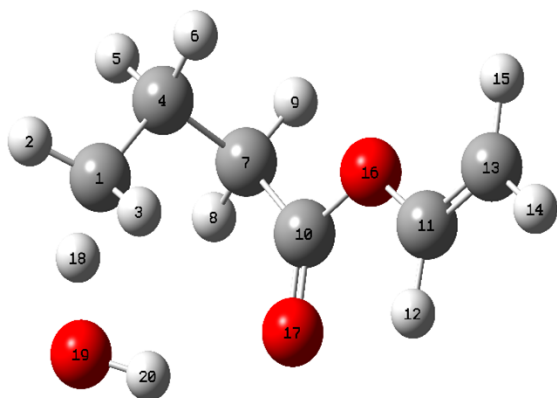

TS6

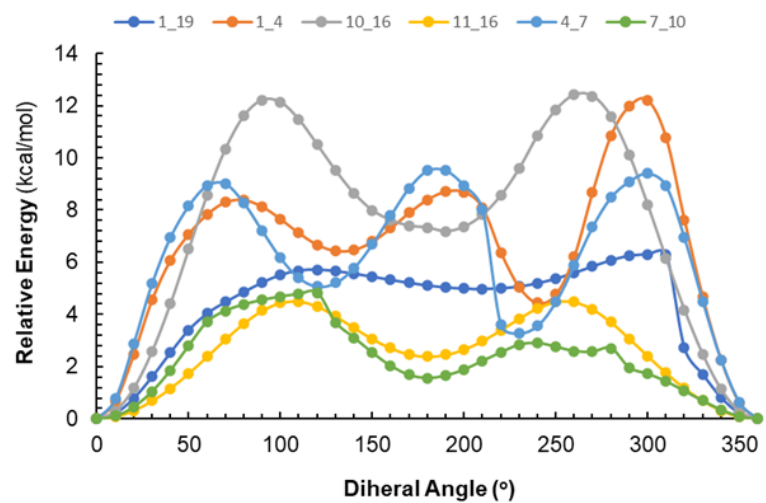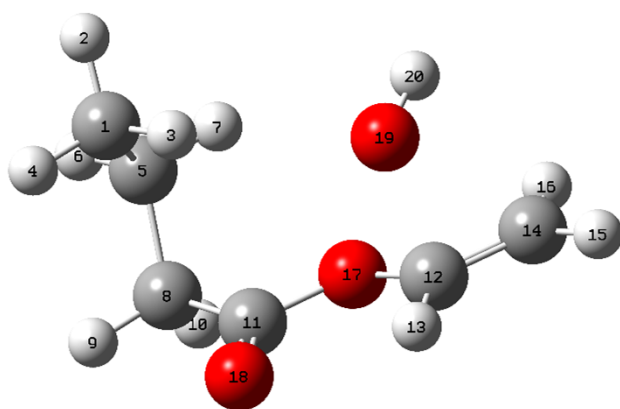

TS8

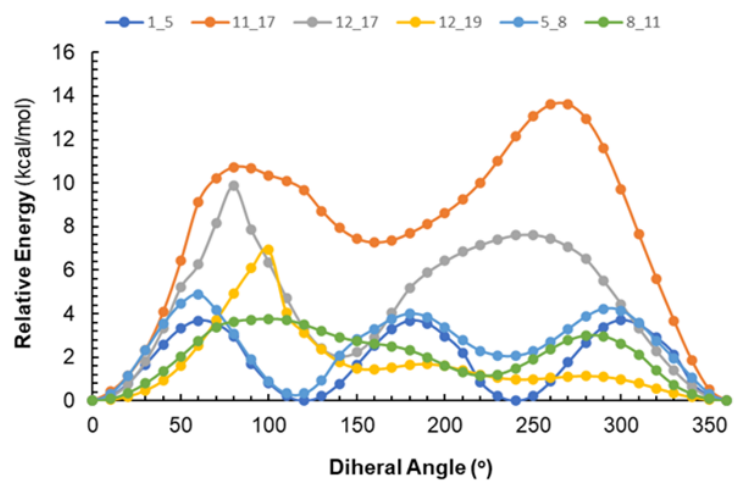

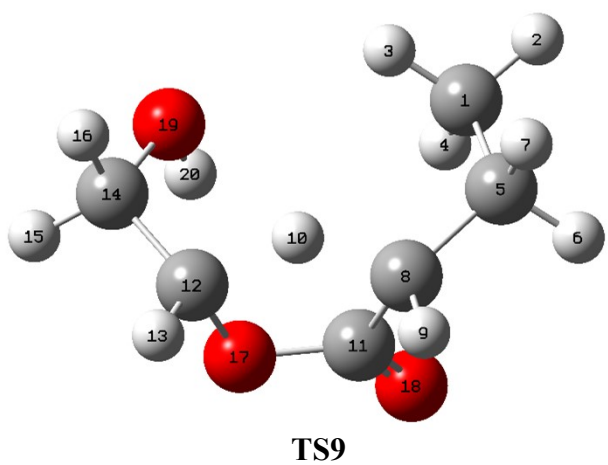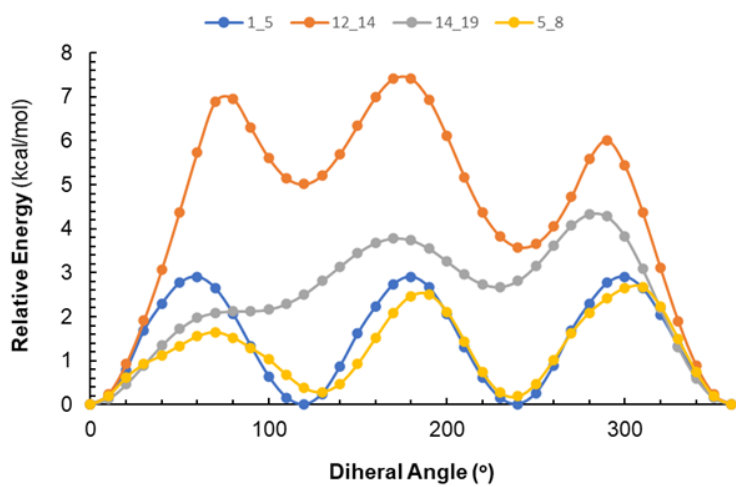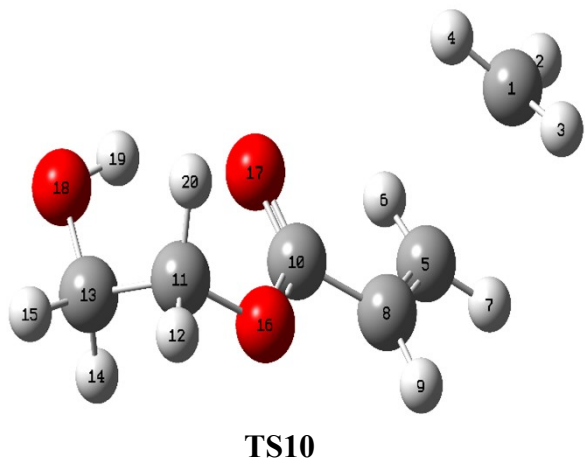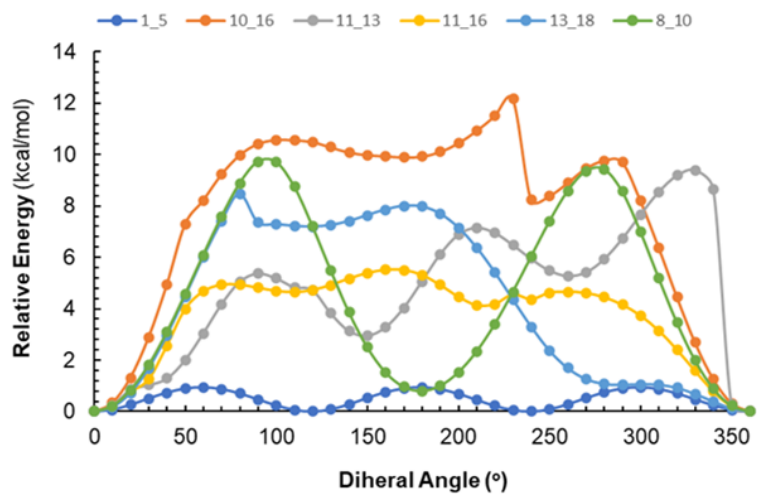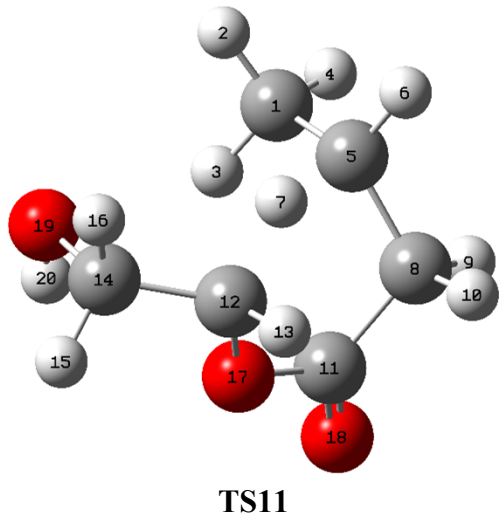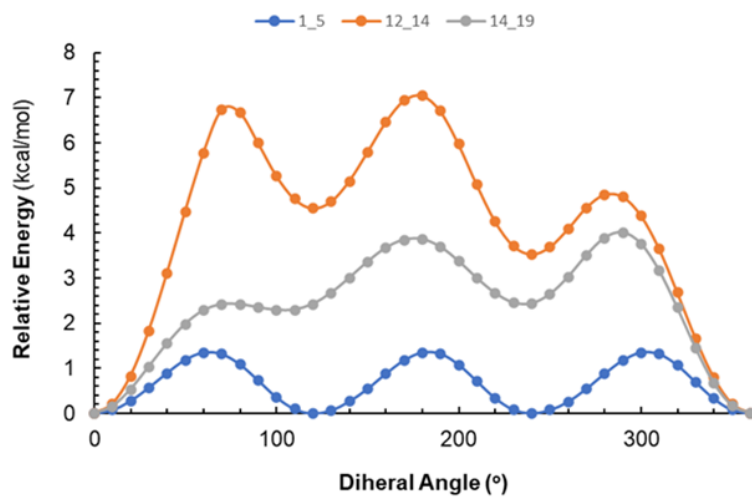



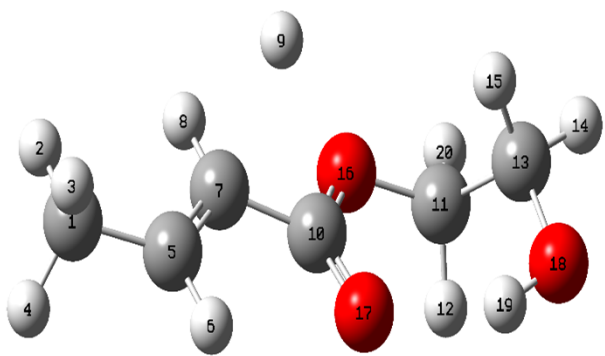

TS12

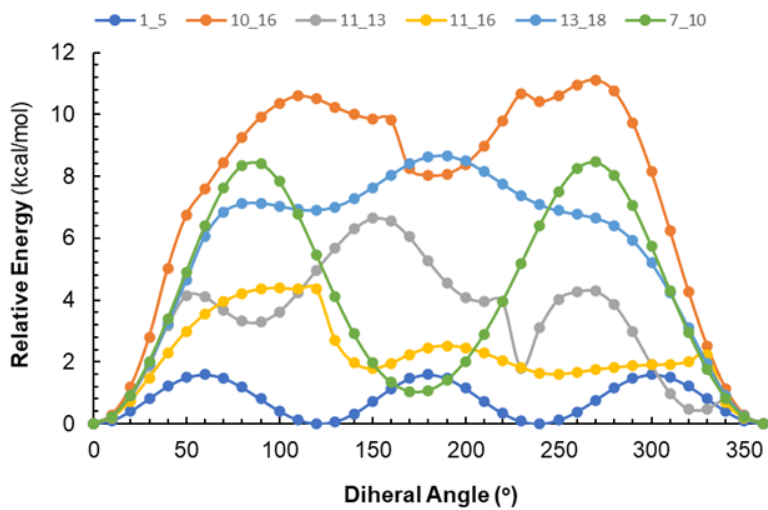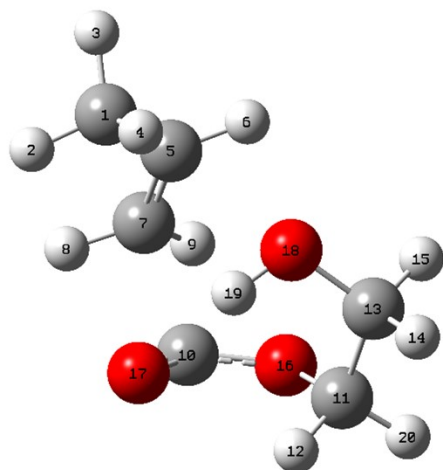

TS13

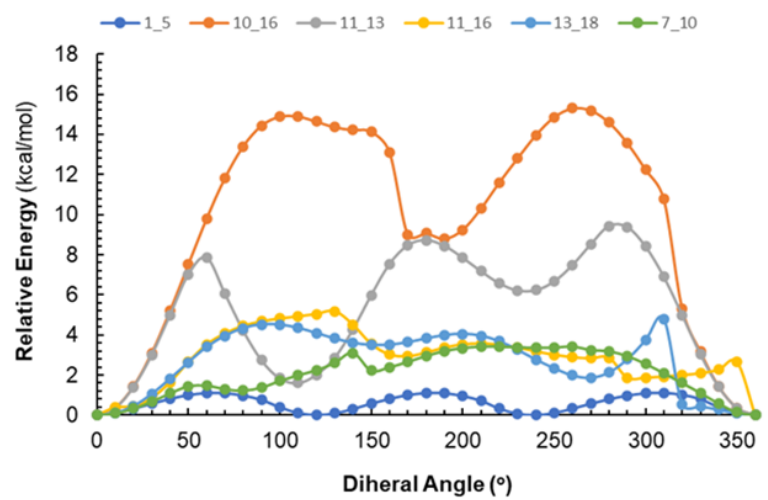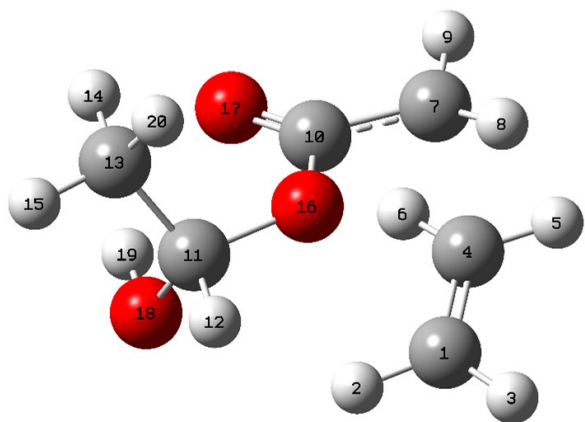

TS15

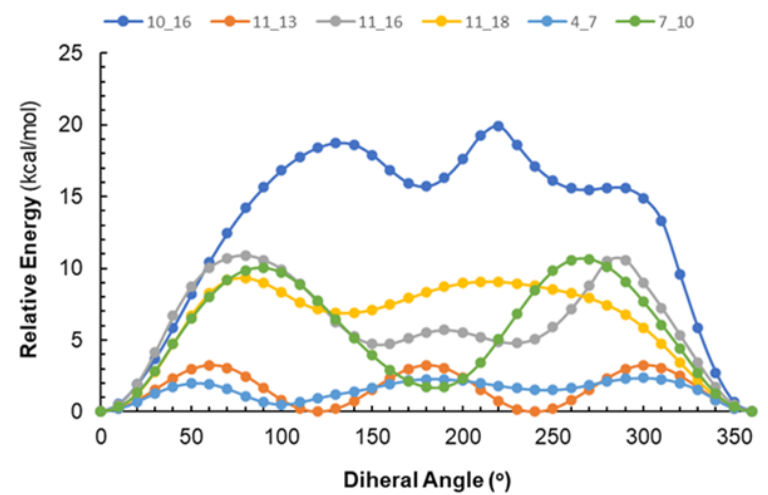

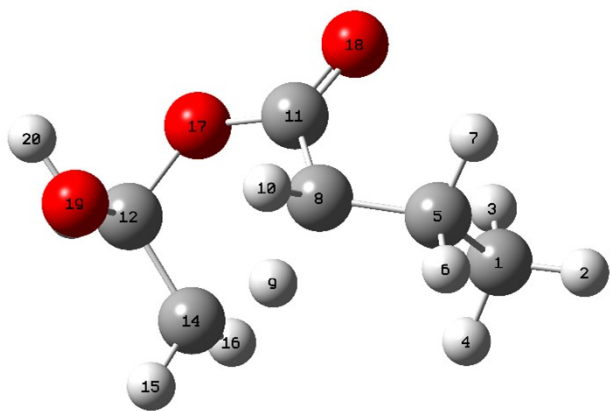

**TS16**

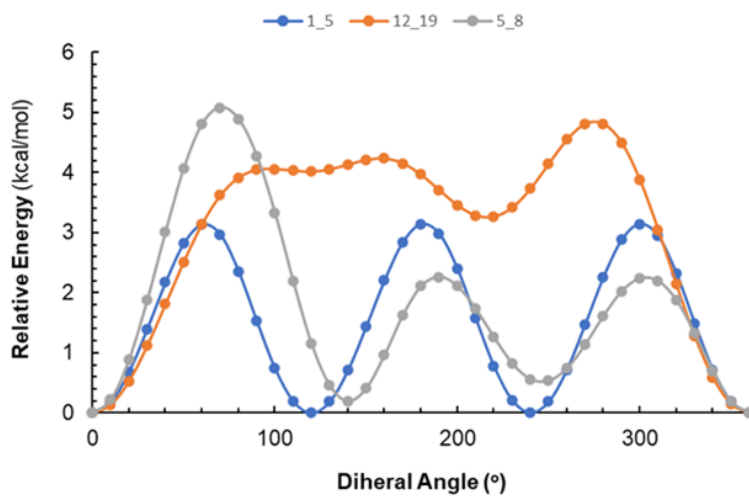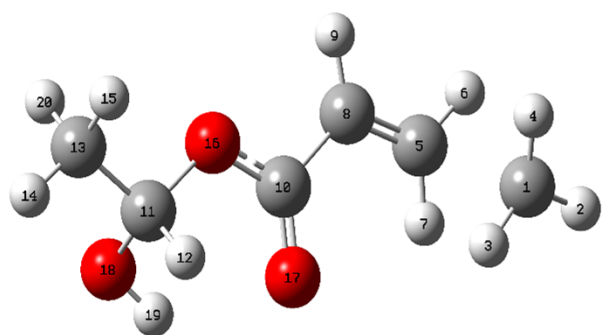

**TS17**

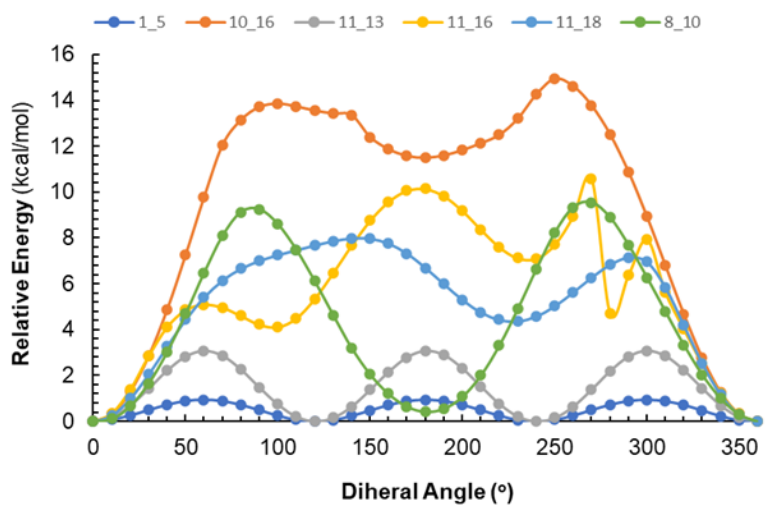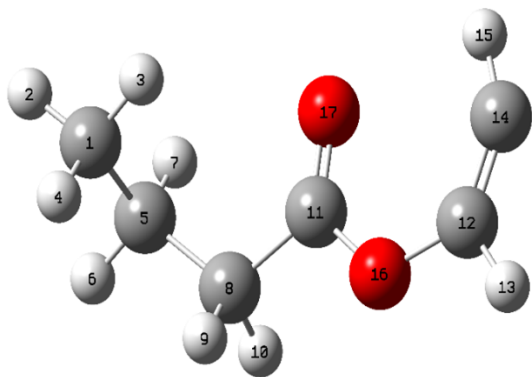

**P1**

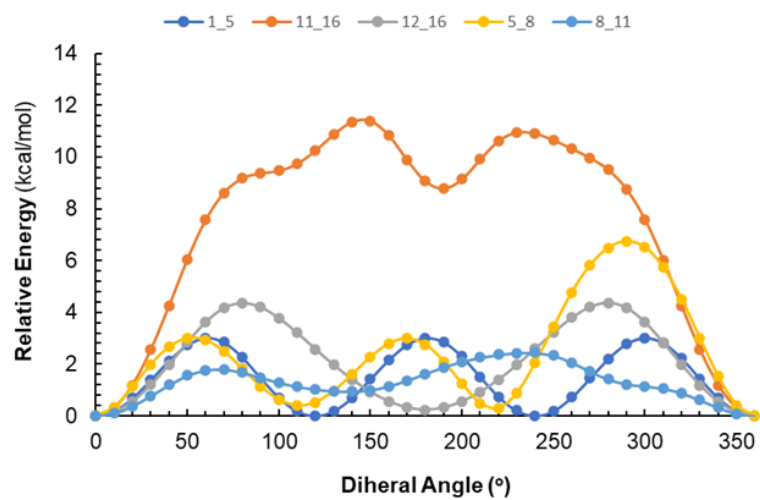

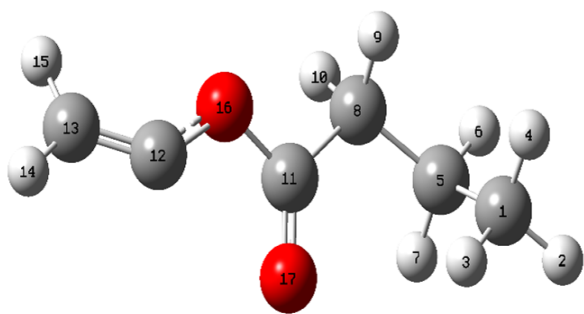

**P2**

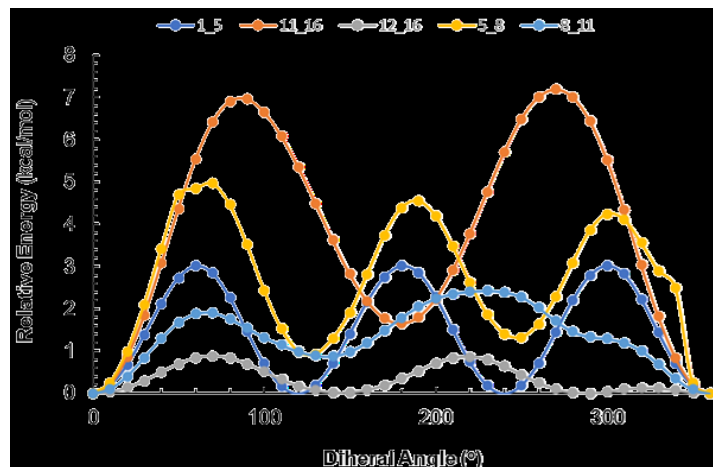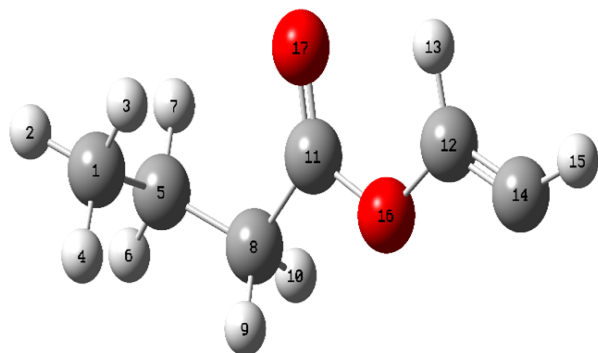

**P3**

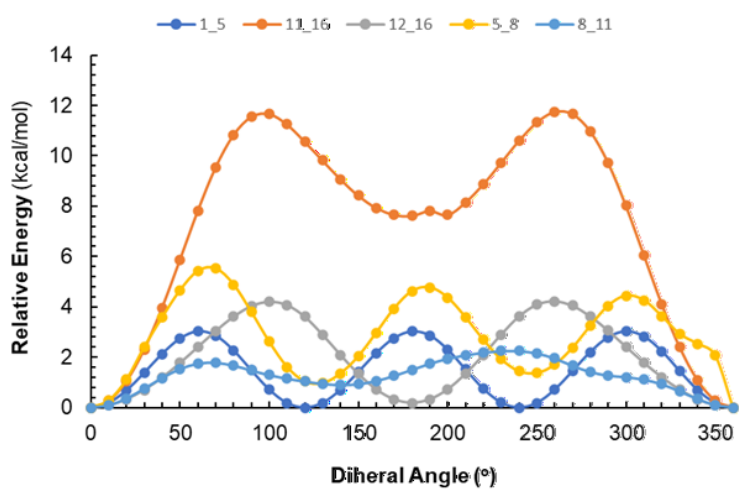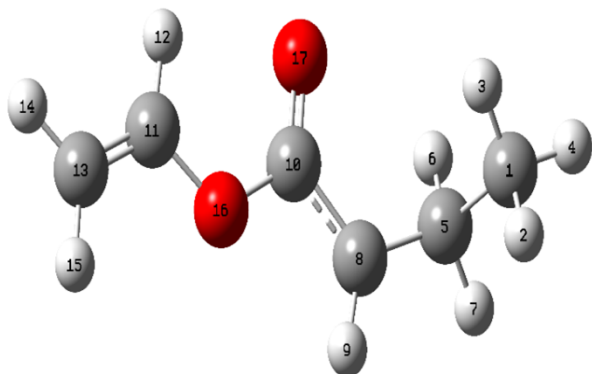

**P4**

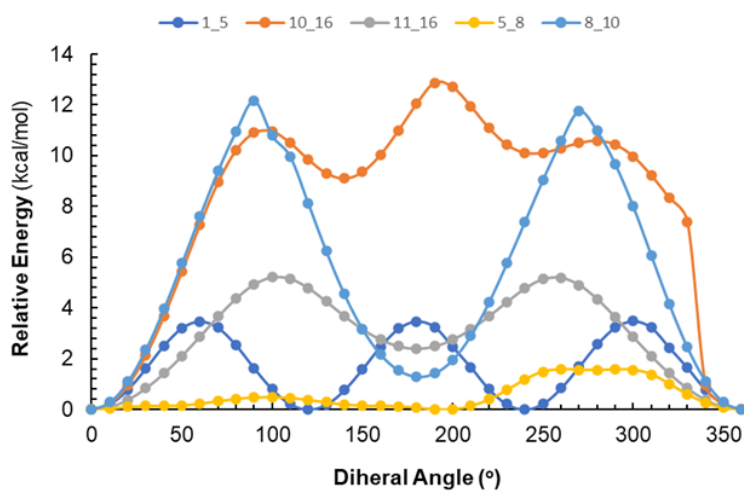

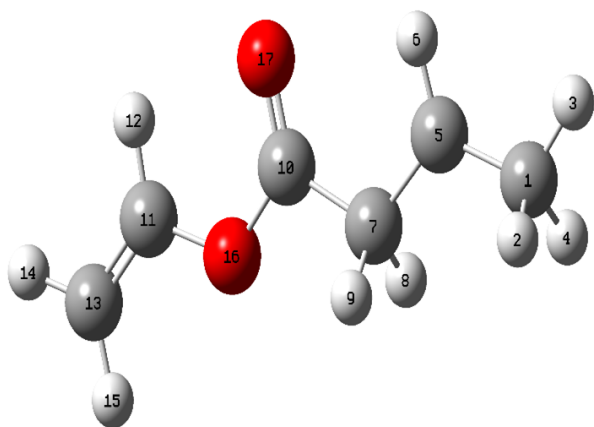

**P5**

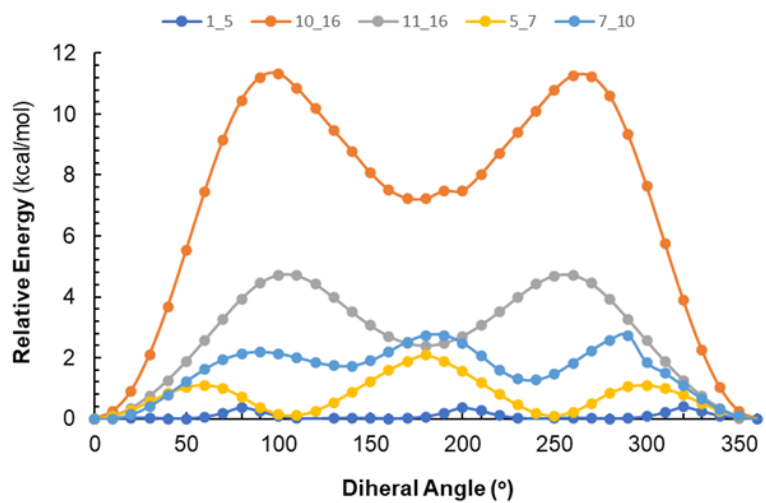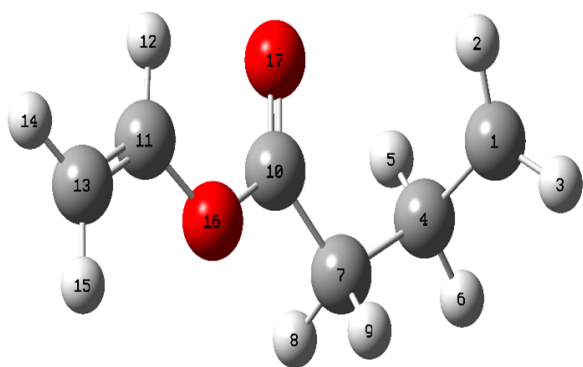

**P6**

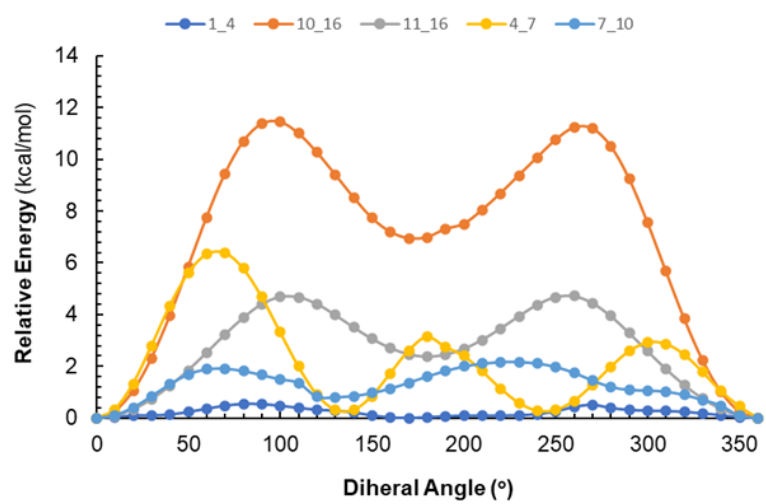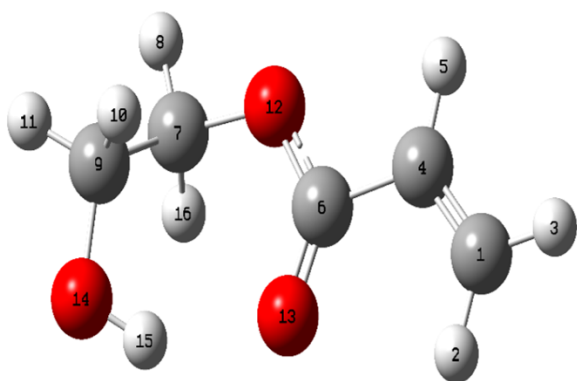

**P7**

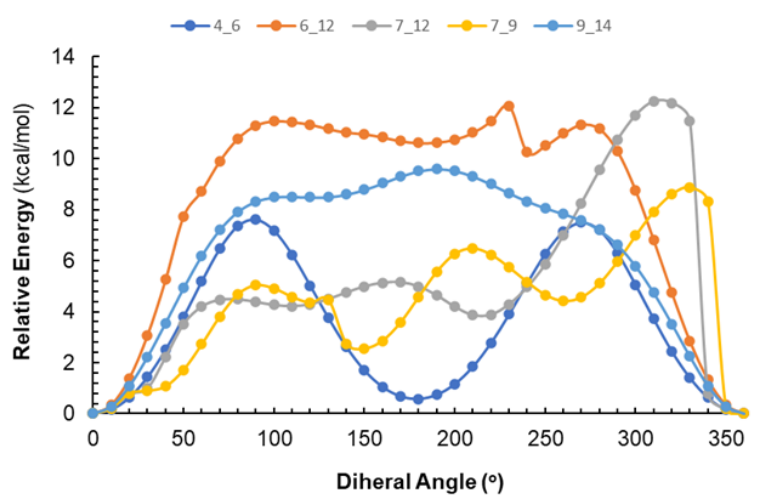

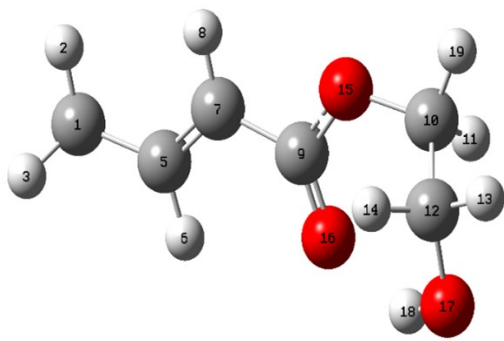

**P8**

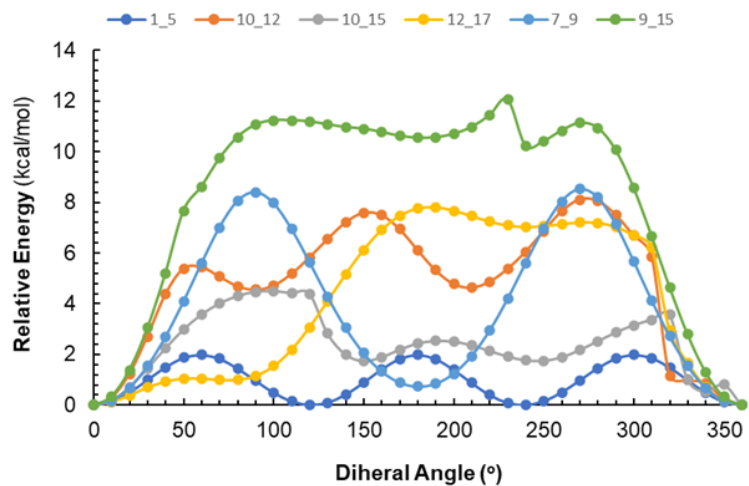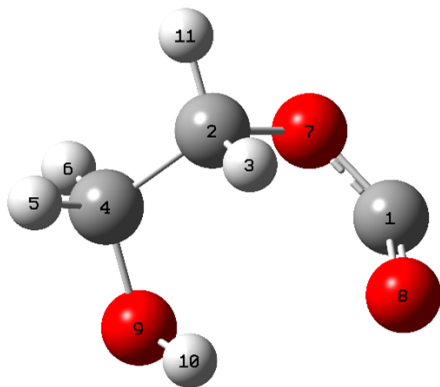

**P9**

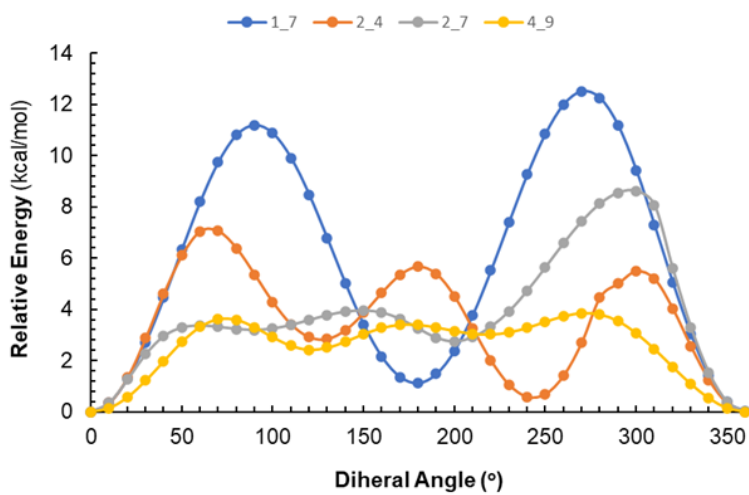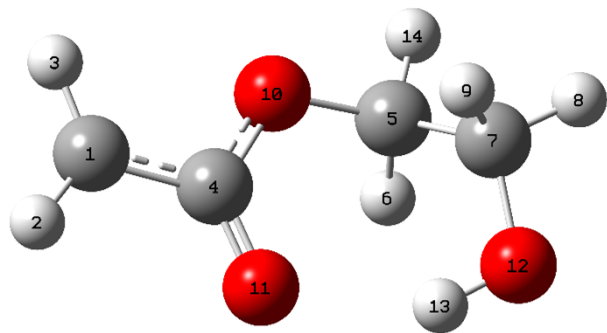

**P10**

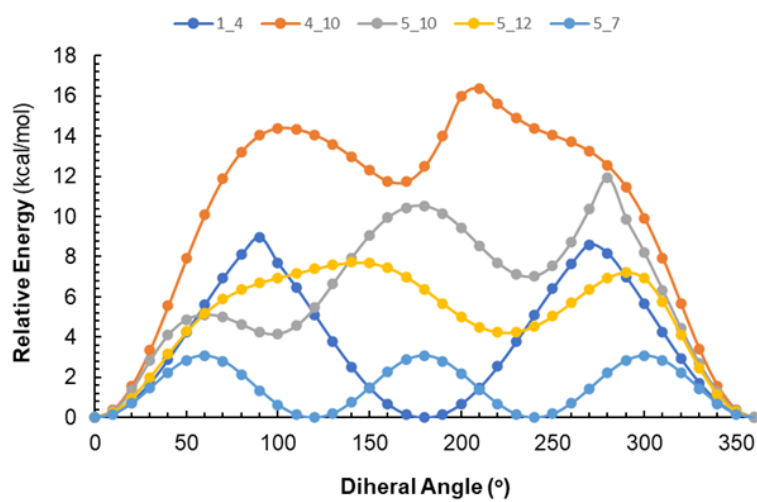

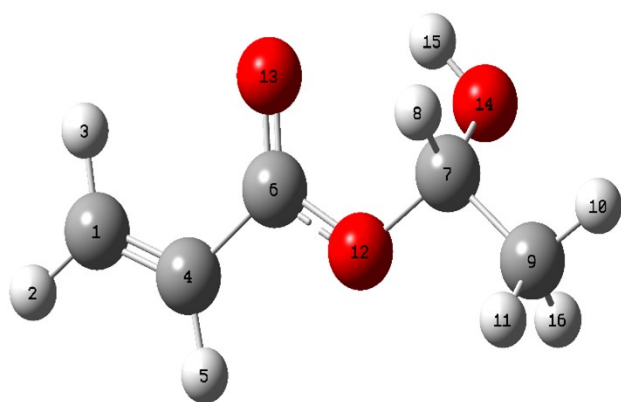

**P11**

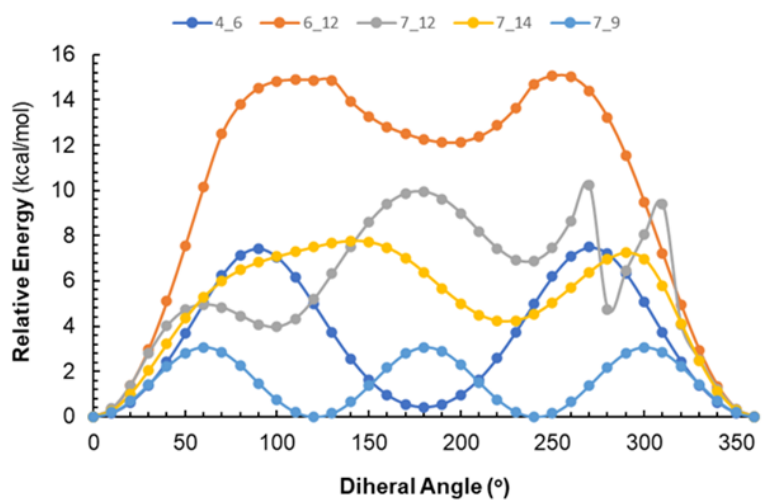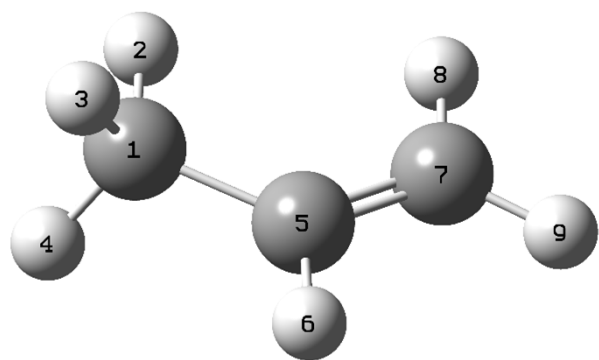

**C<sub>3</sub>H<sub>6</sub>**

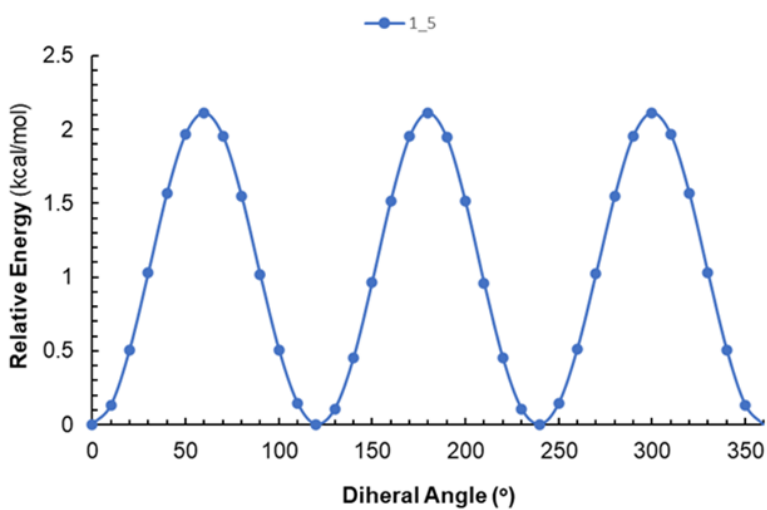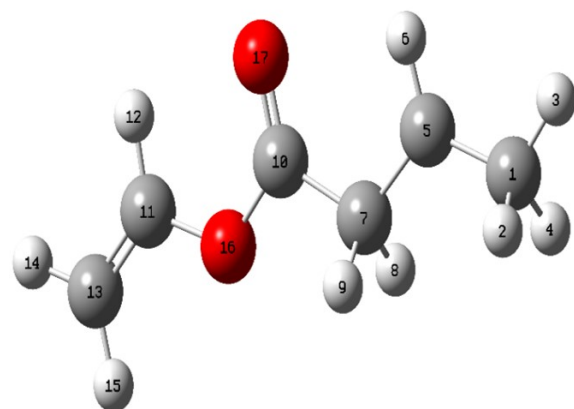

**P5**

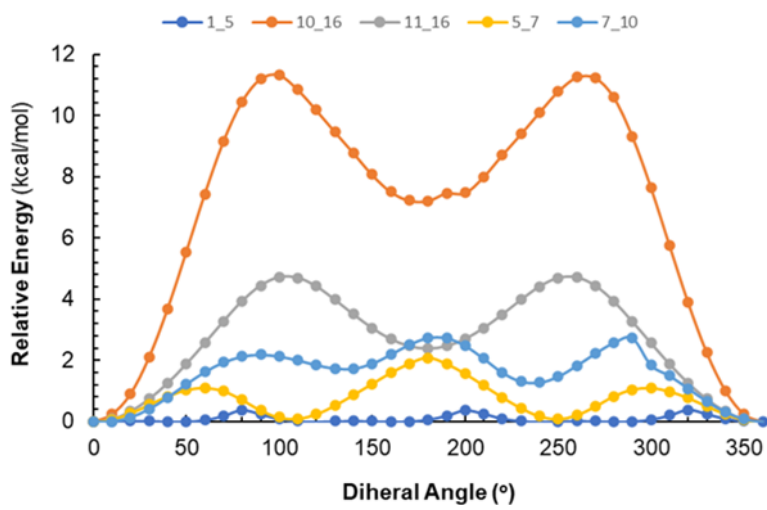

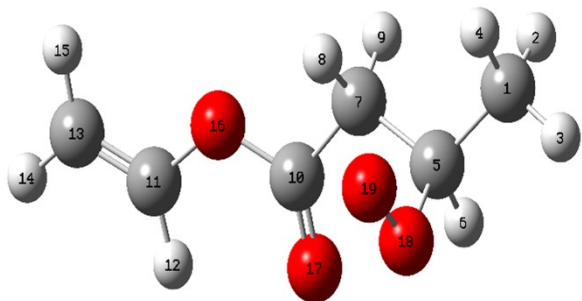

IM7

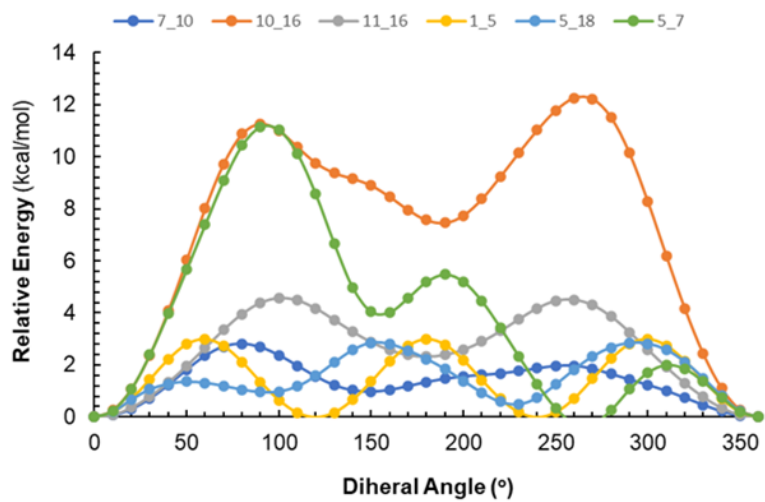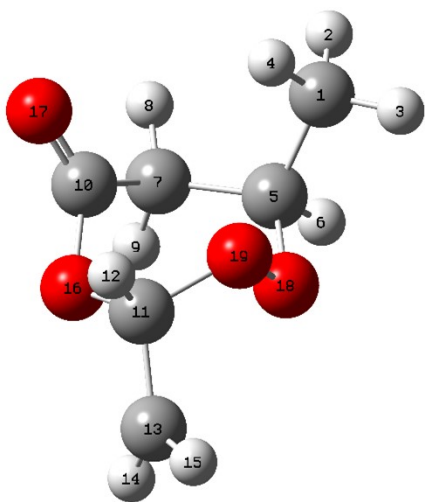

IM8

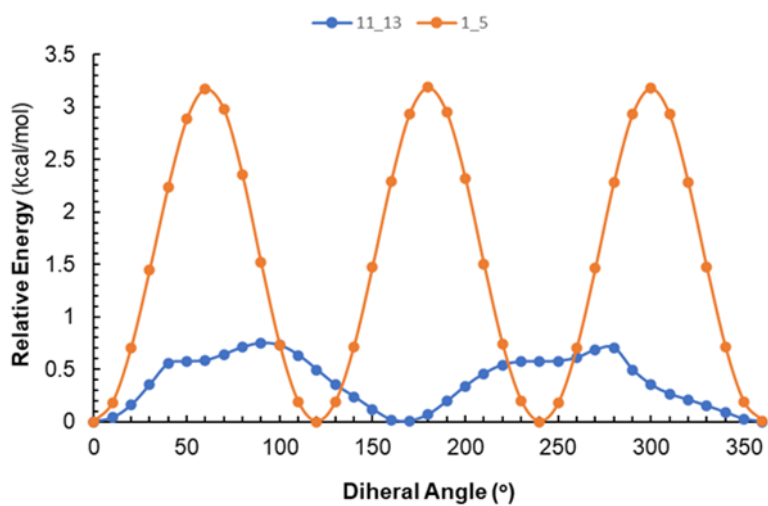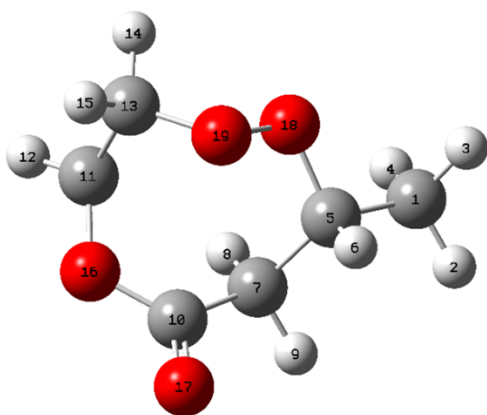

IM9

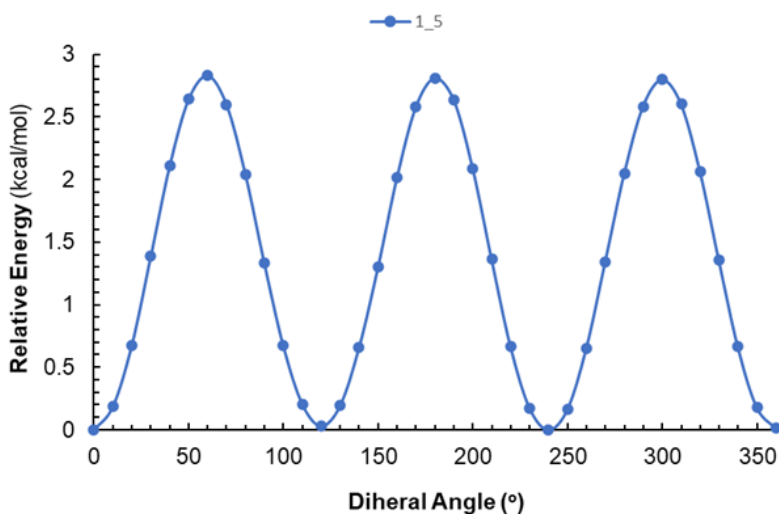

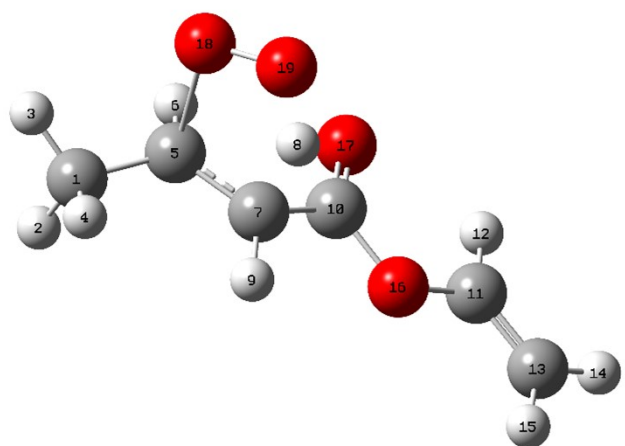

TS18

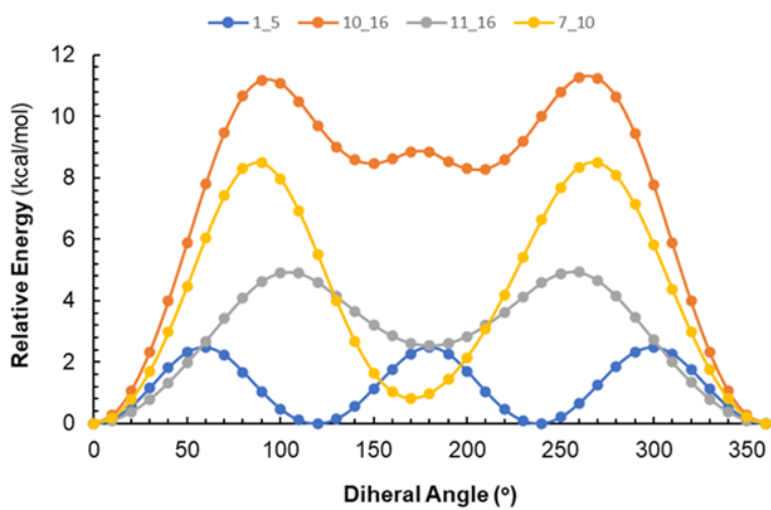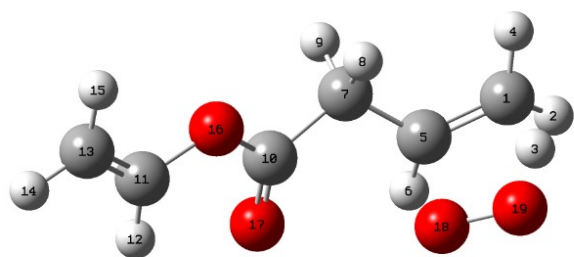

TS19

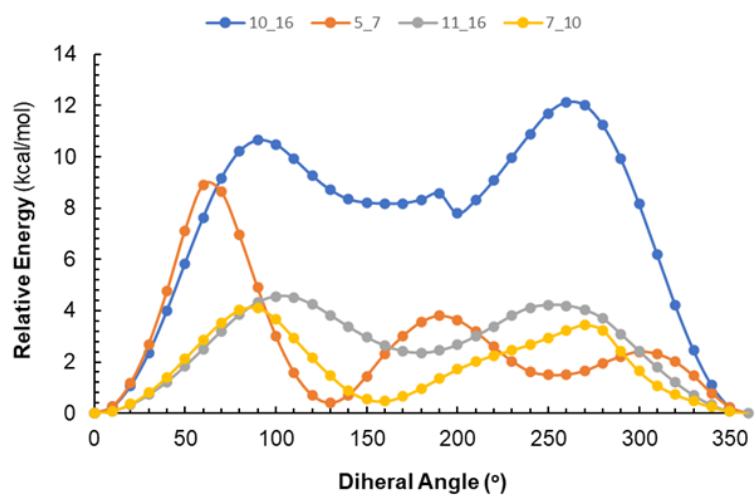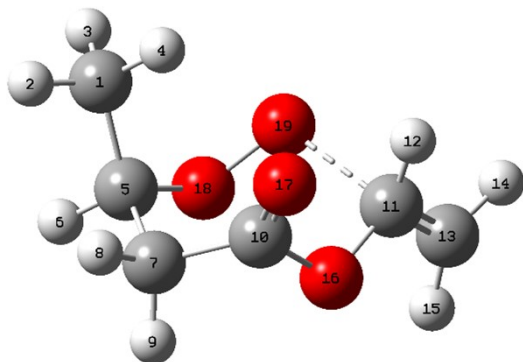

TS20

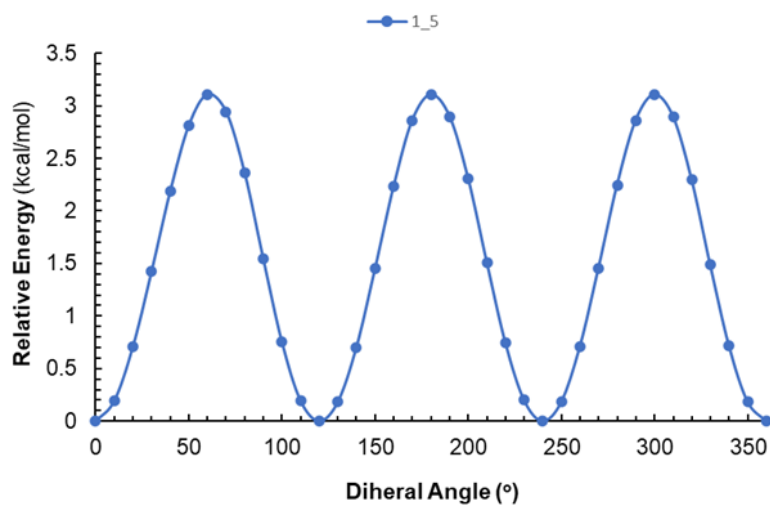



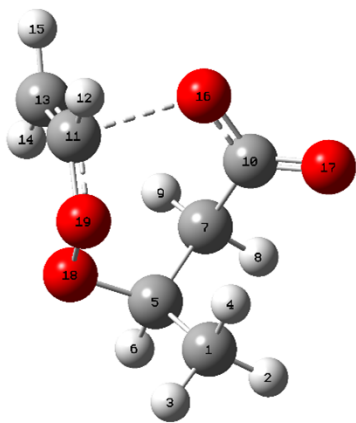

TS21

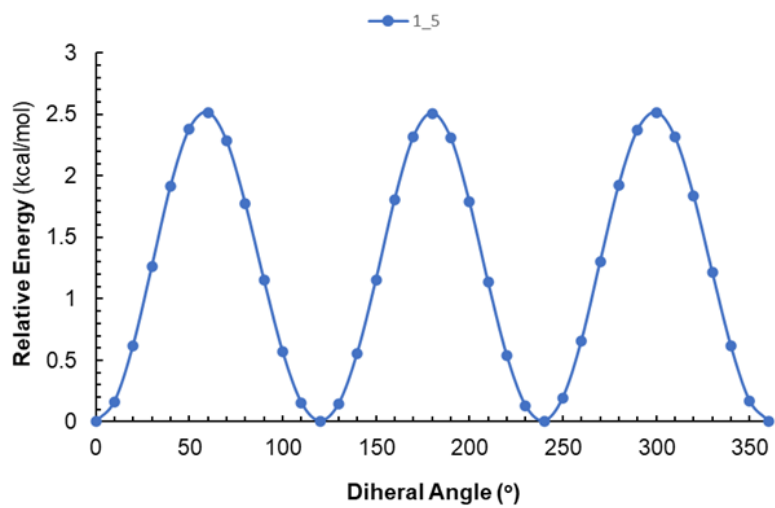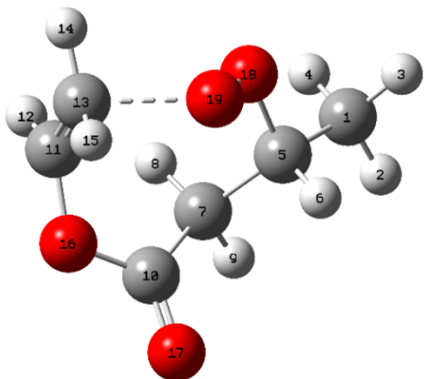

TS22

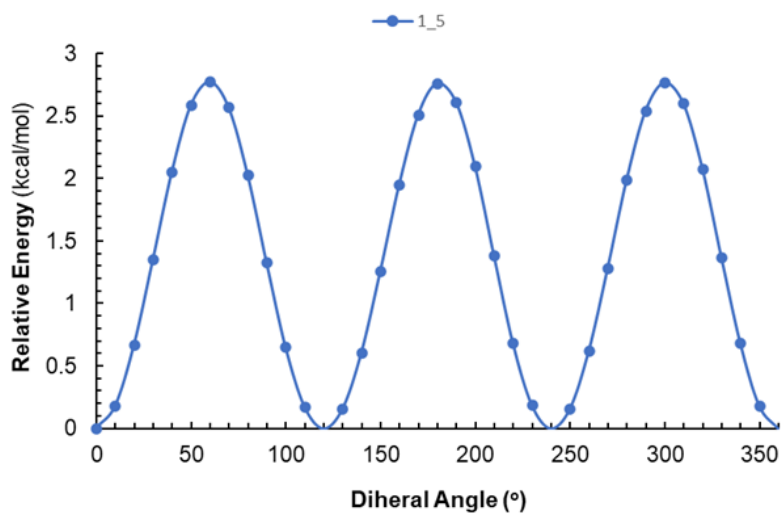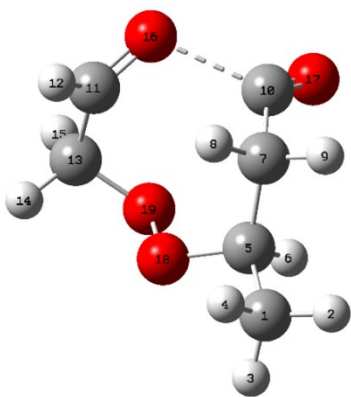

TS23

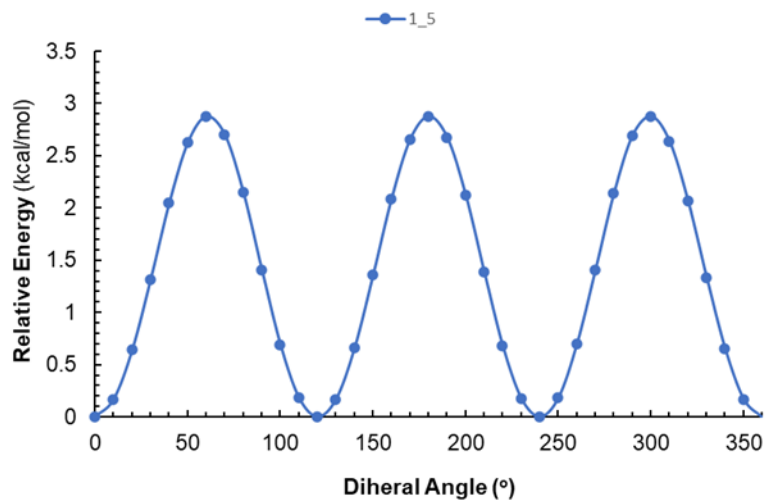

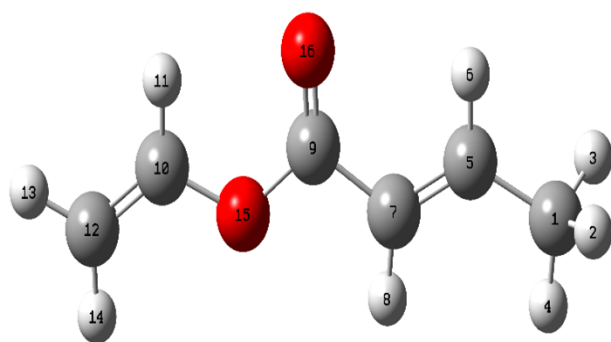

**P12**

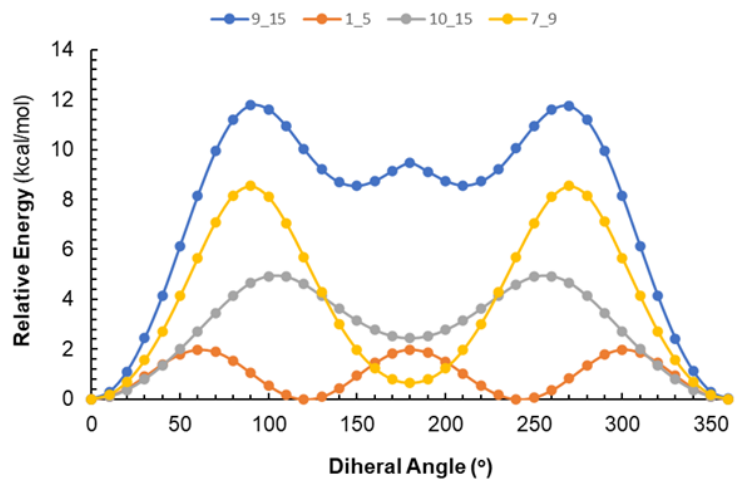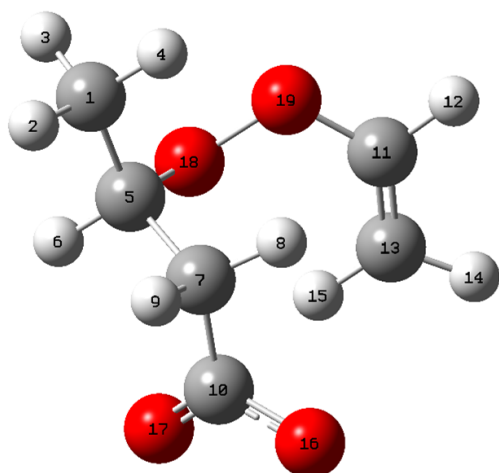

**P13**

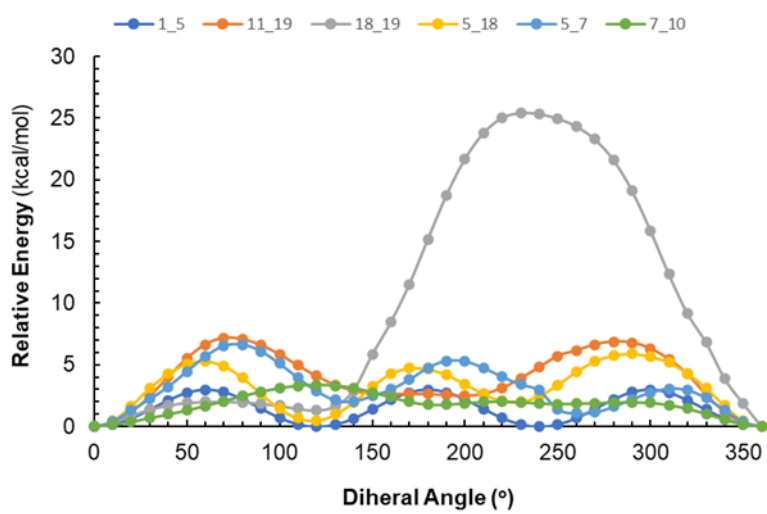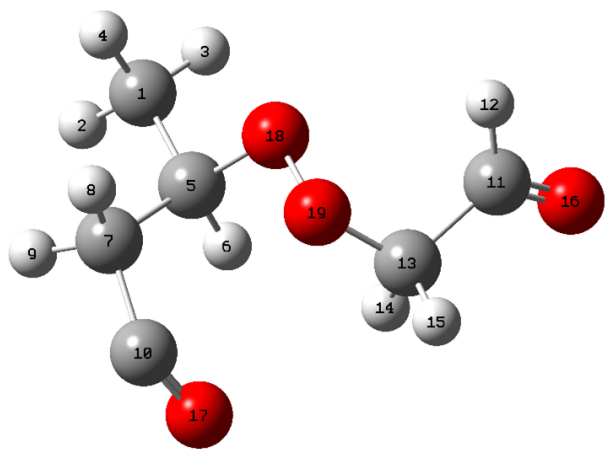

**P14**

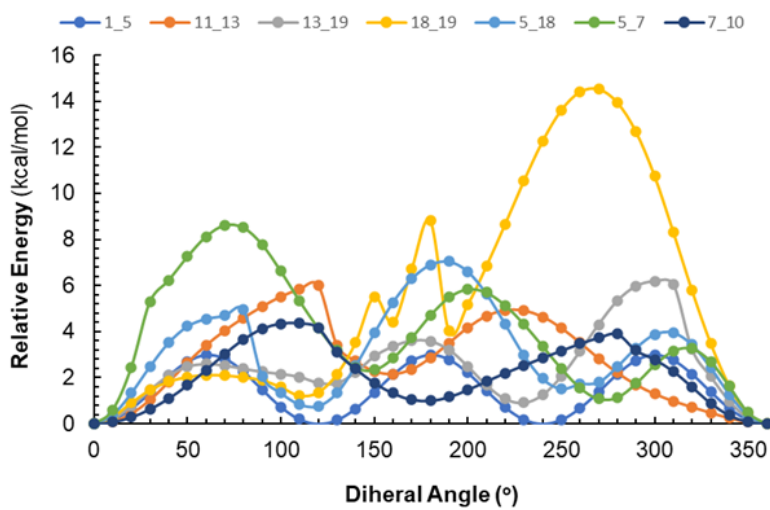

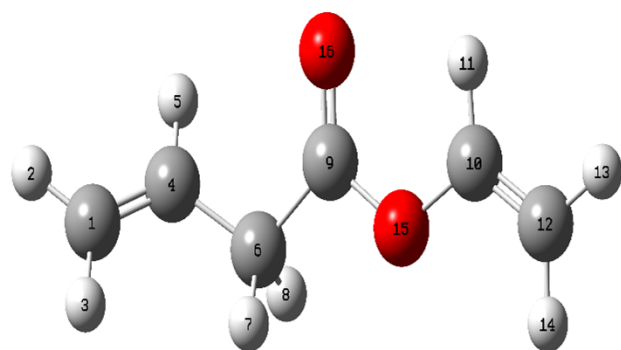

**P15**

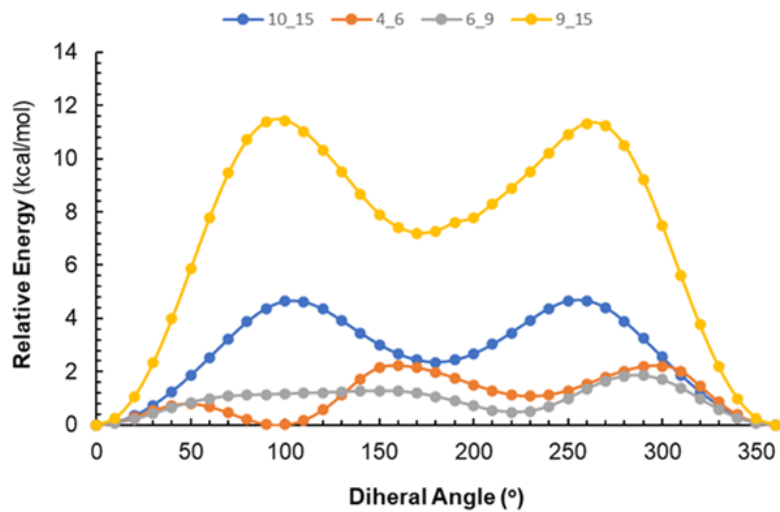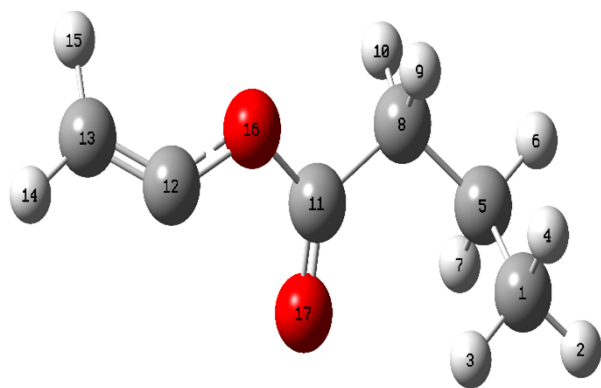

**IM10**

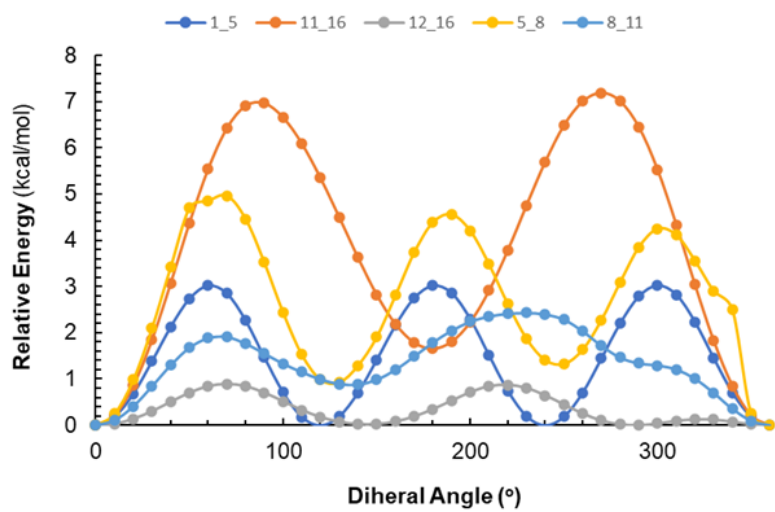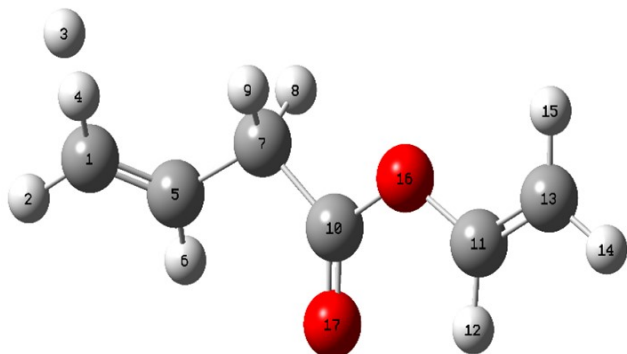

**TS24**

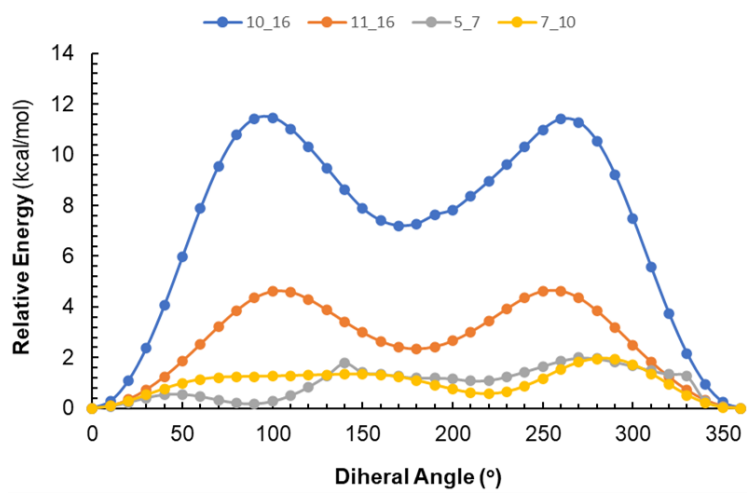

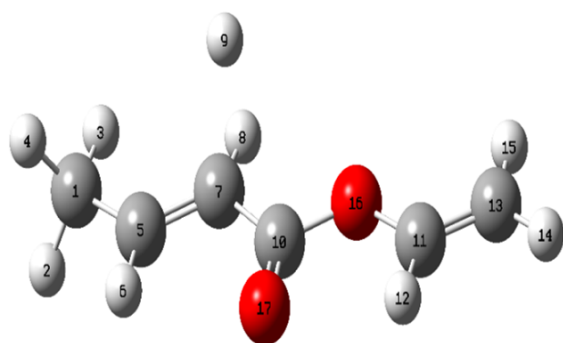

TS25

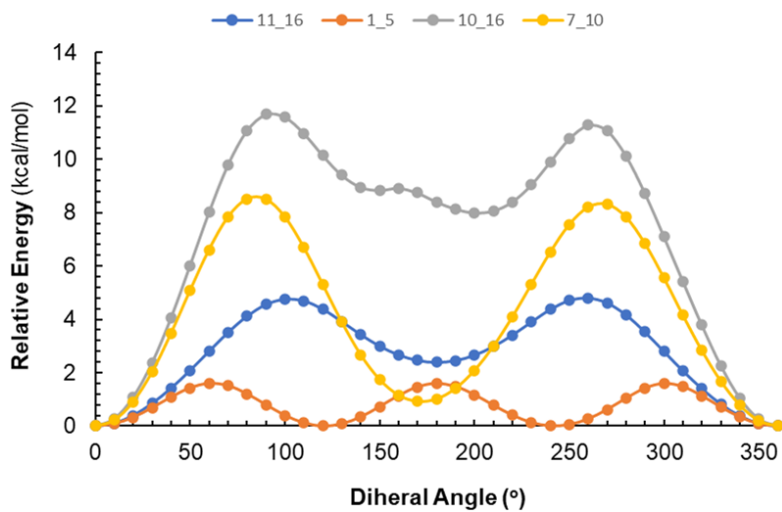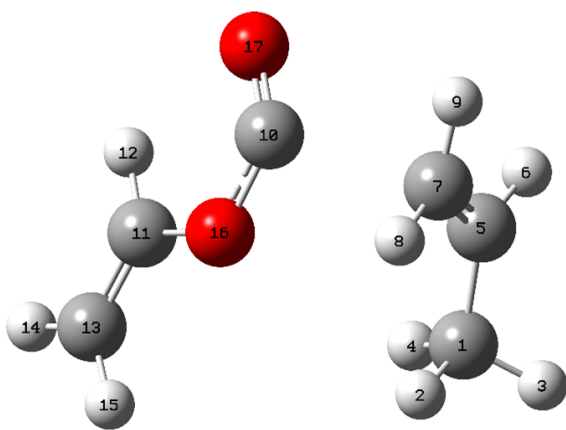

TS26

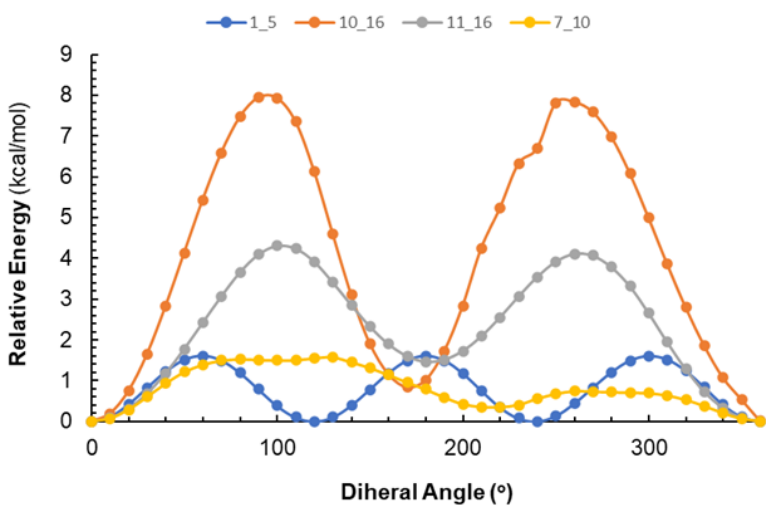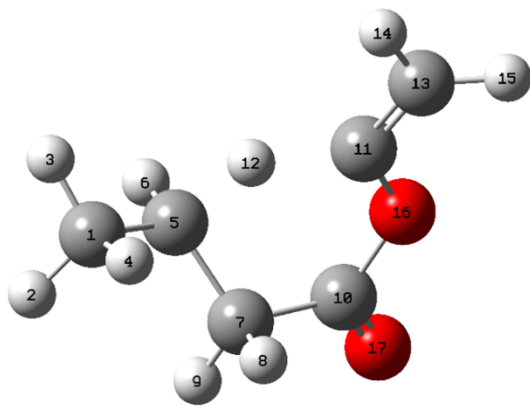

TS27

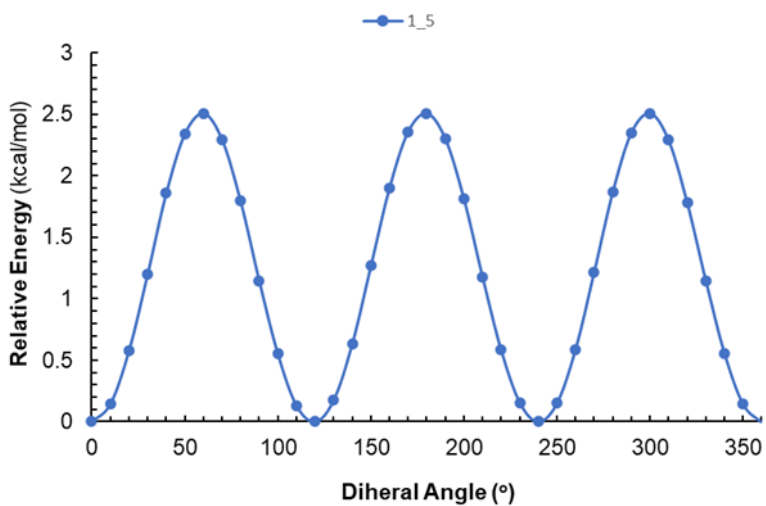

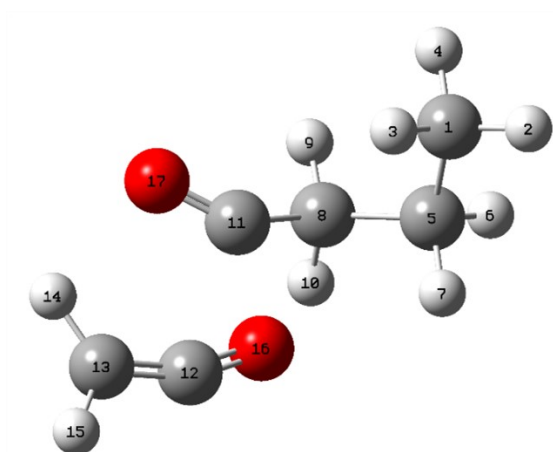

**TS28**

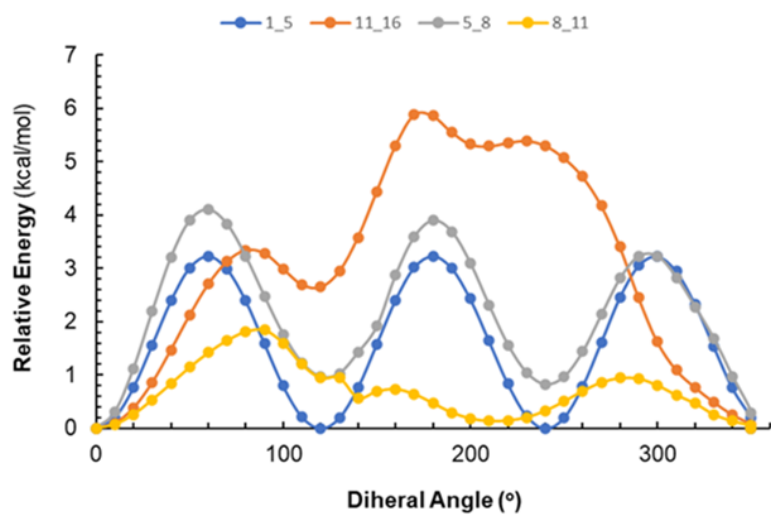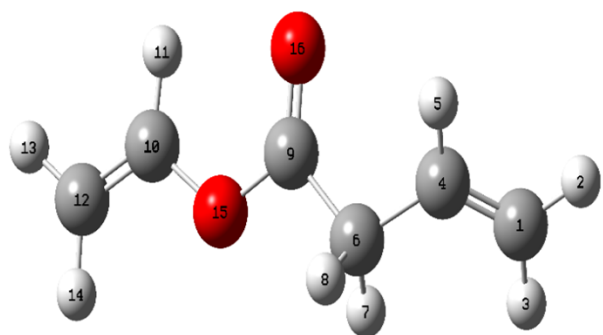

**P16**

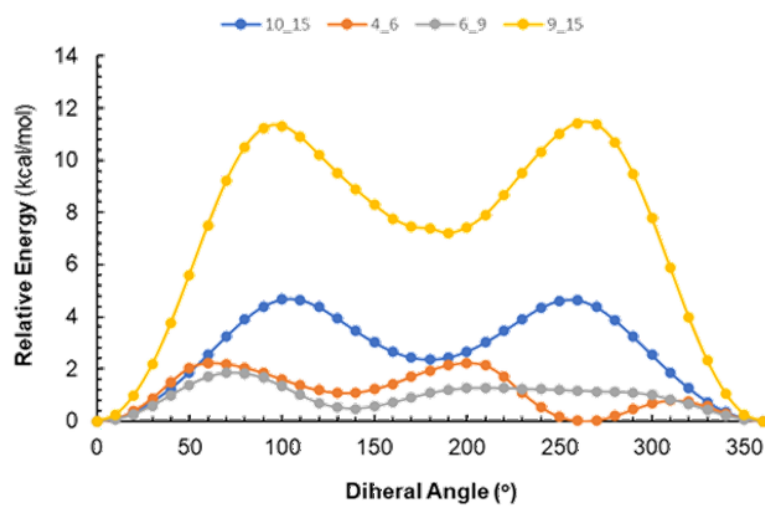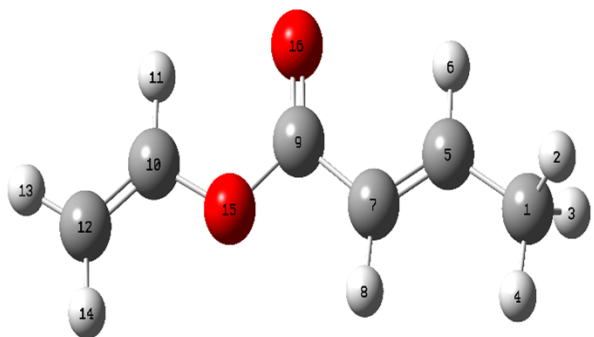

**P17**

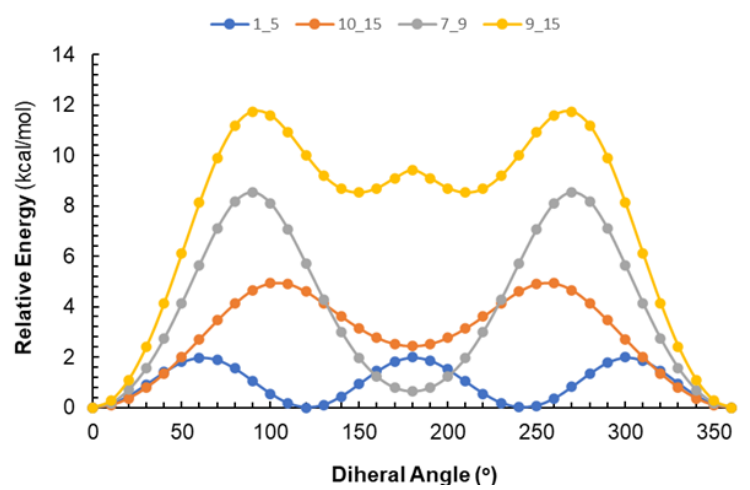

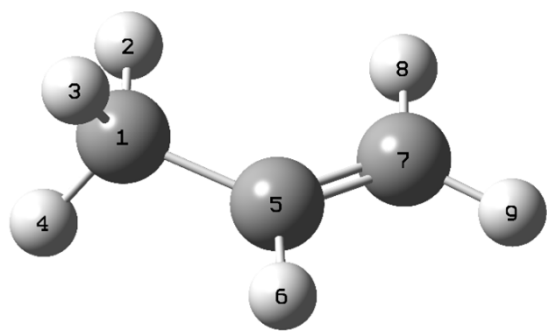

**C<sub>3</sub>H<sub>6</sub>**

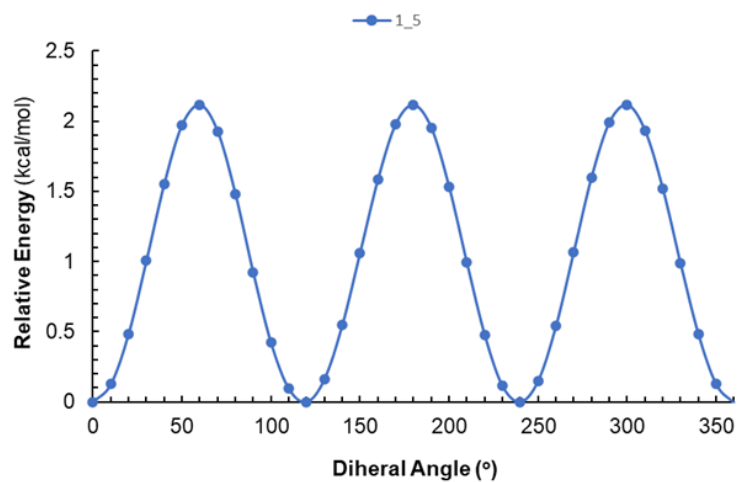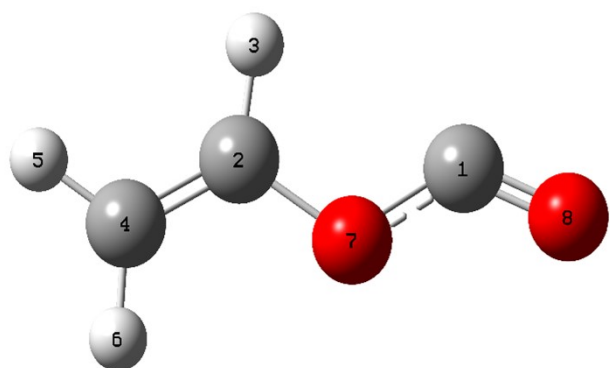

**P18**

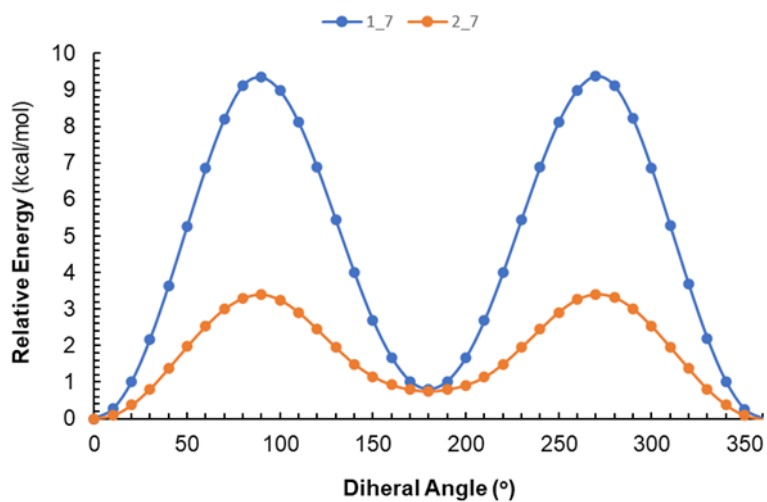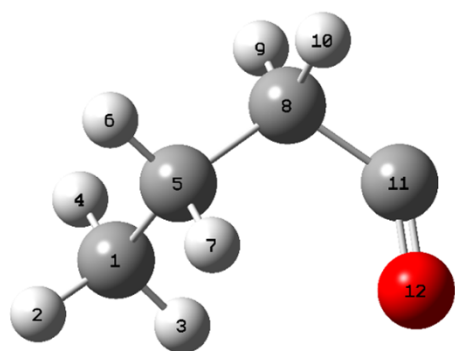

**P19**

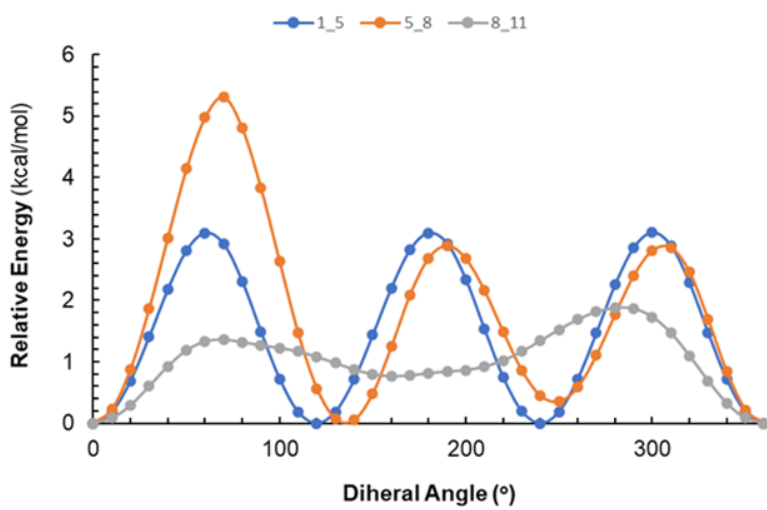

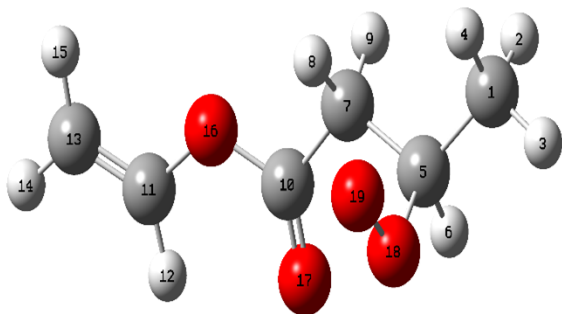

IM7

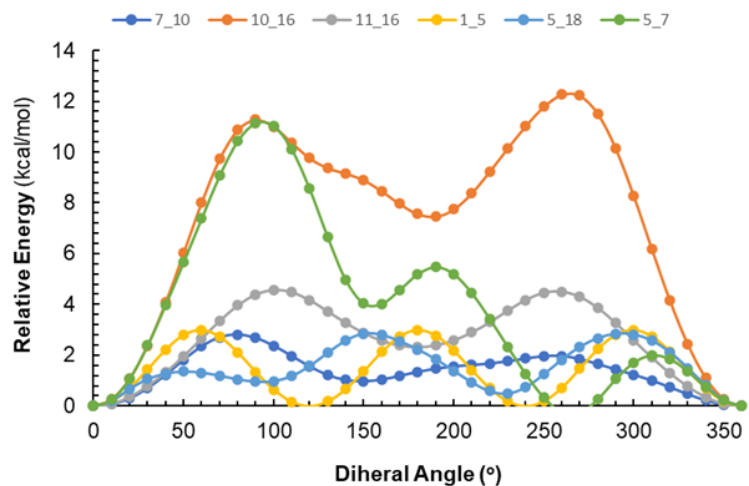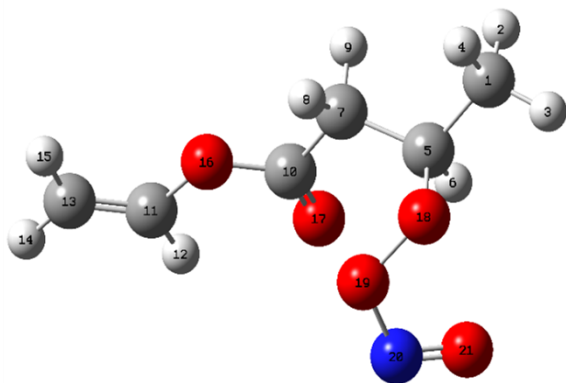

IM11

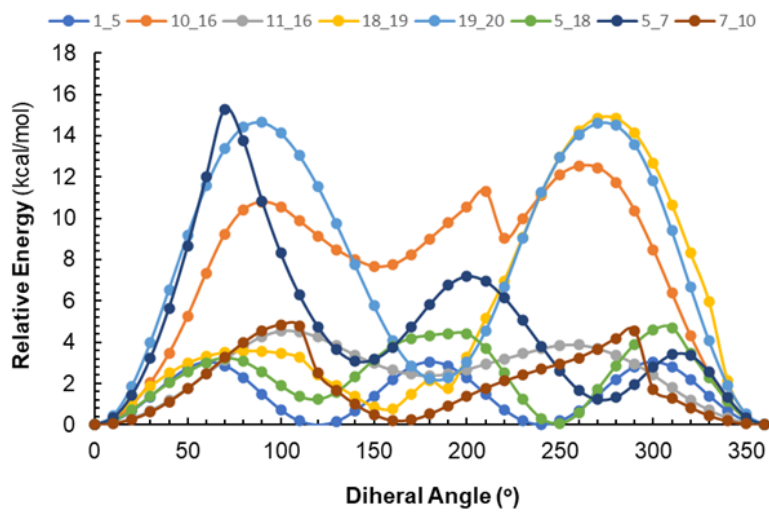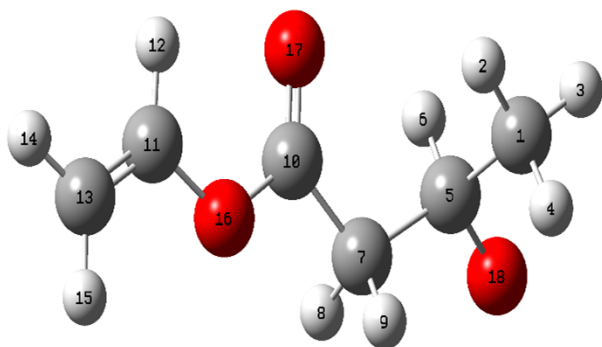

IM12

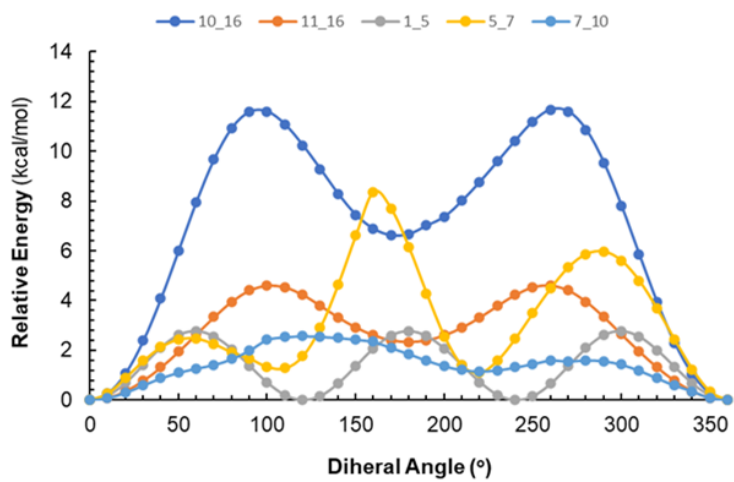

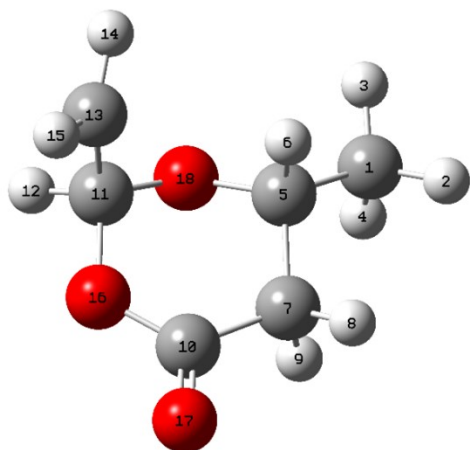

IM13

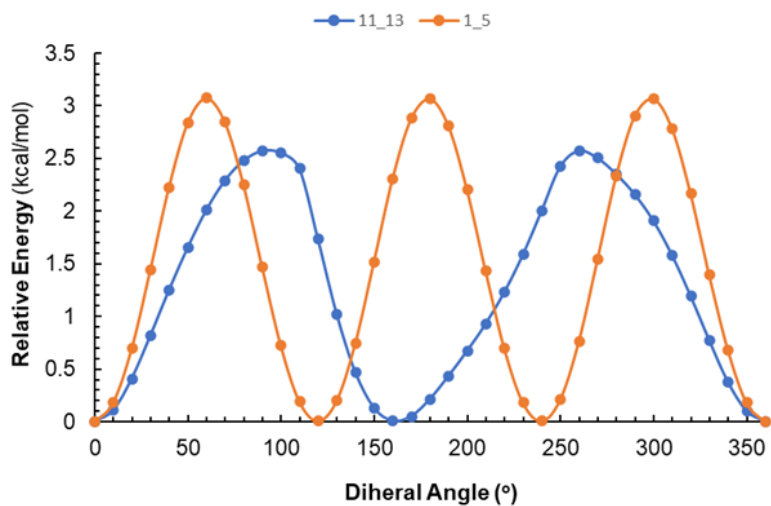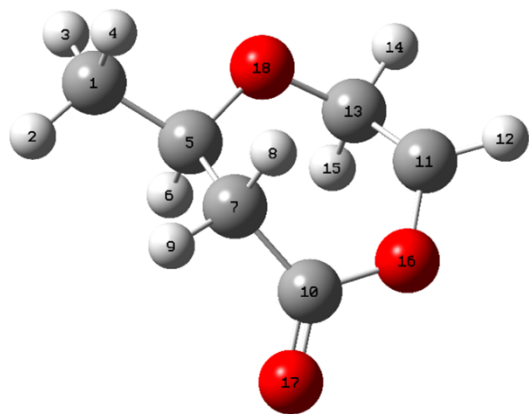

IM14

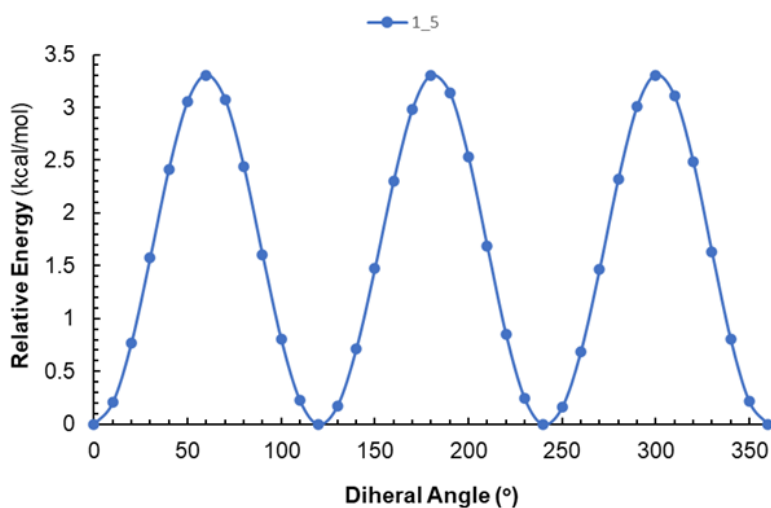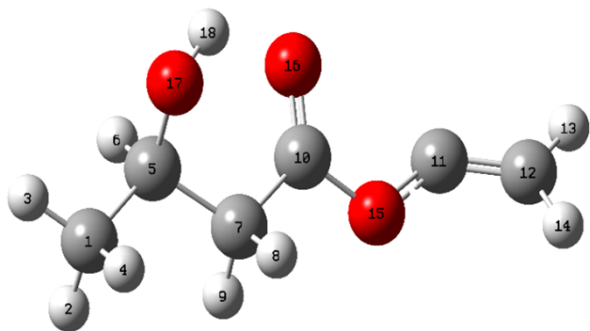

IM15

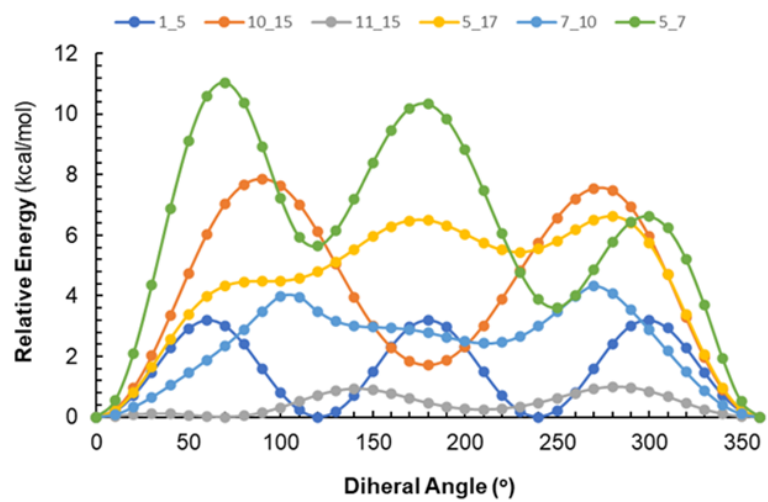



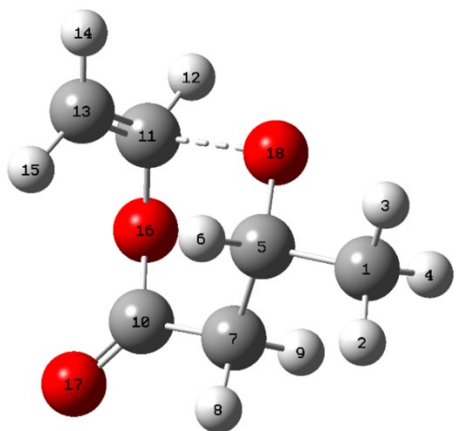

TS29

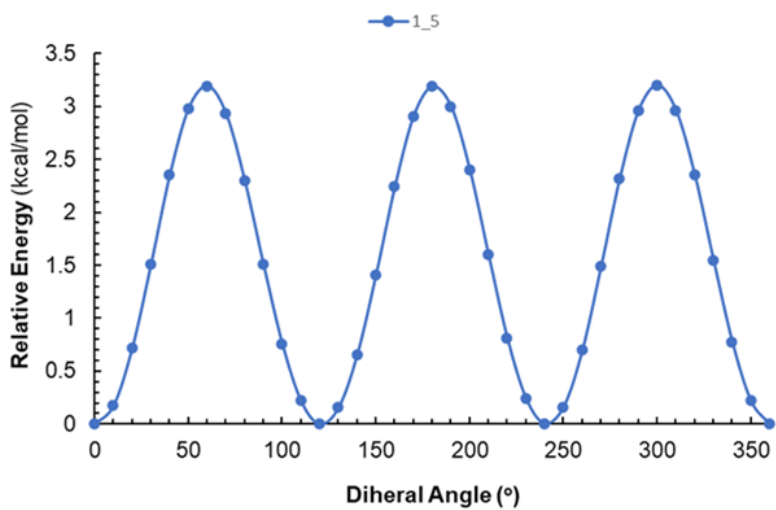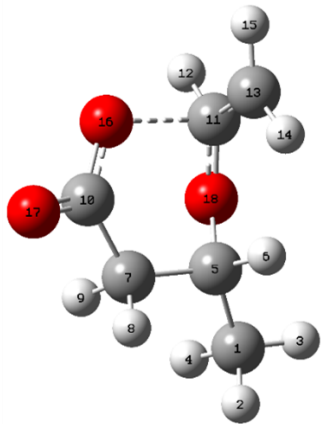

TS30

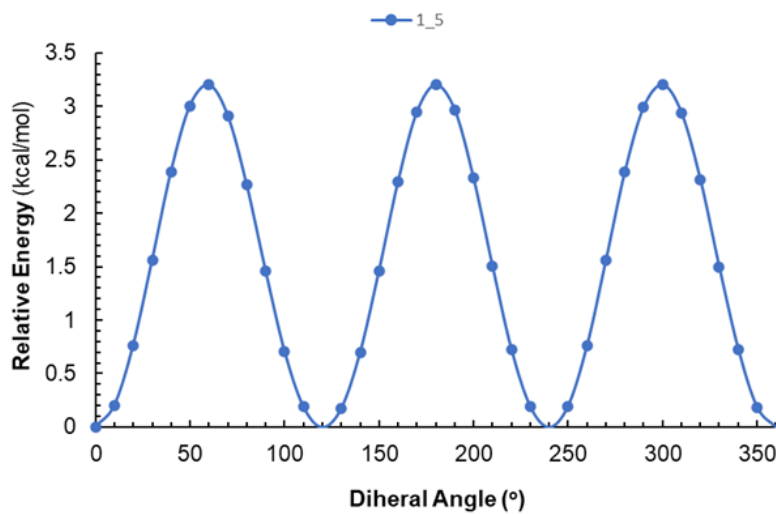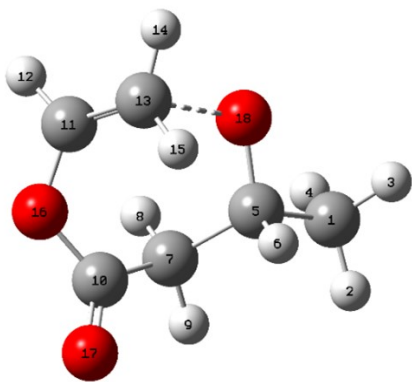

TS31

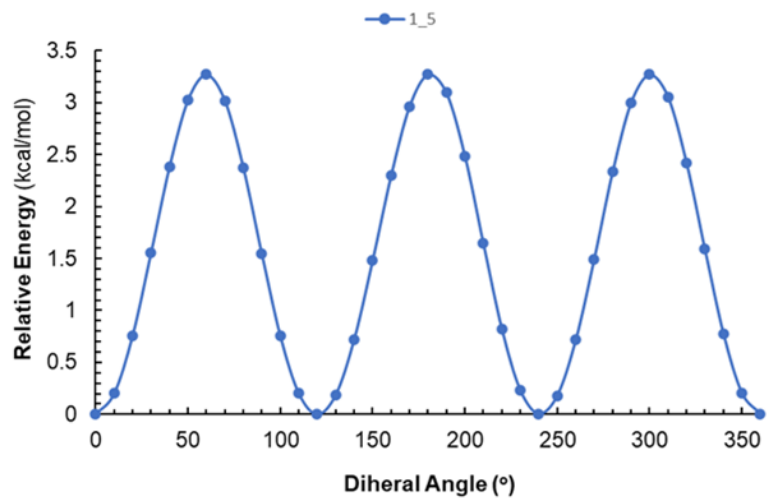

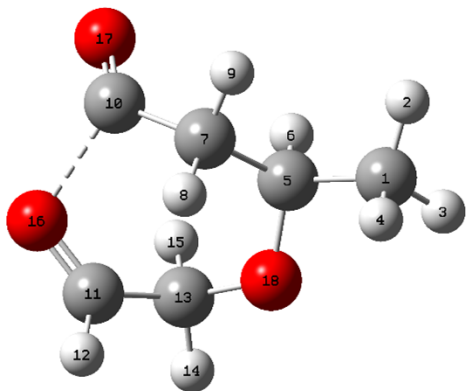

TS32

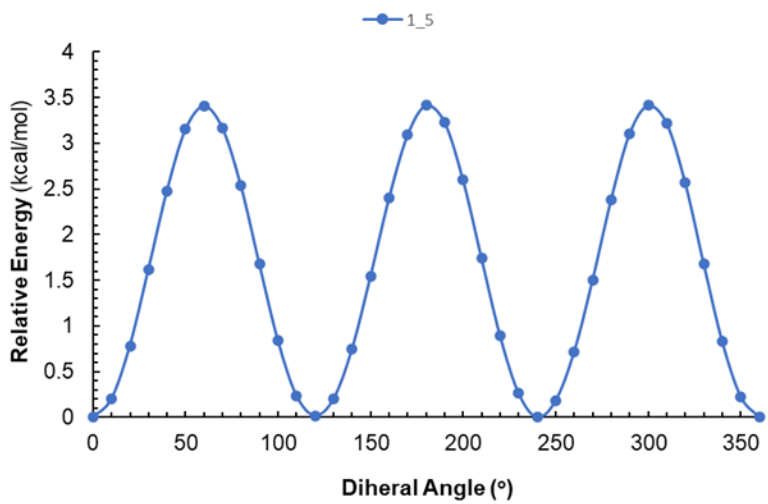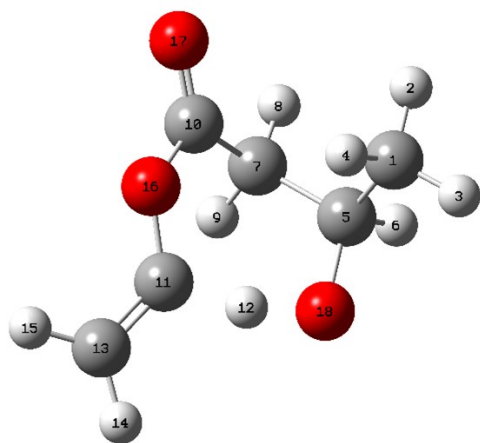

TS33

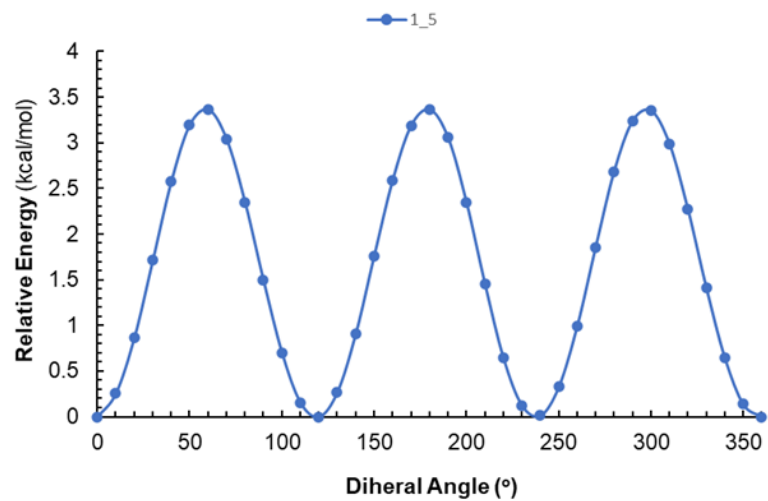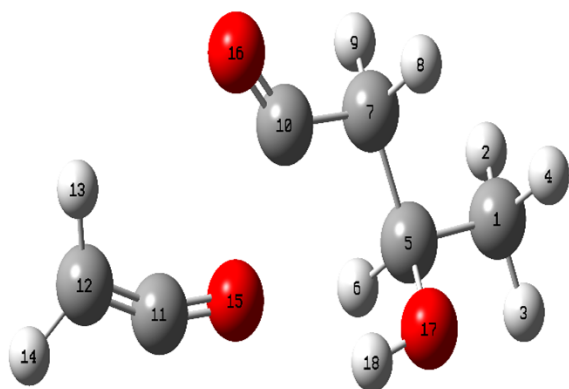

TS34

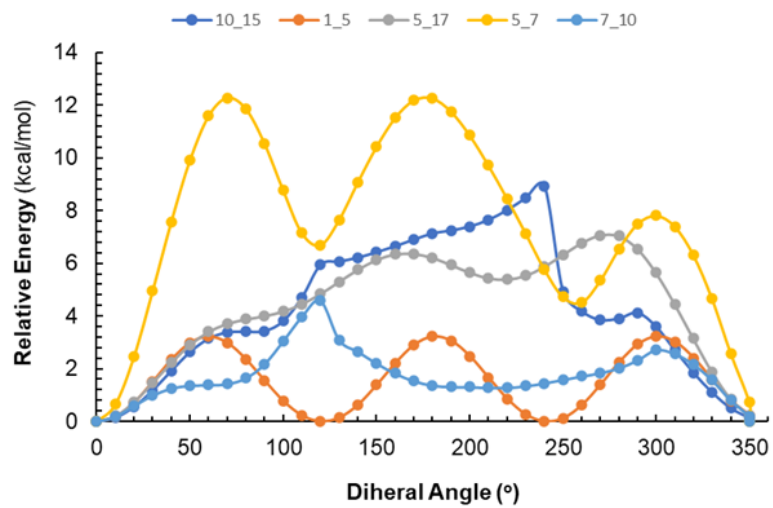

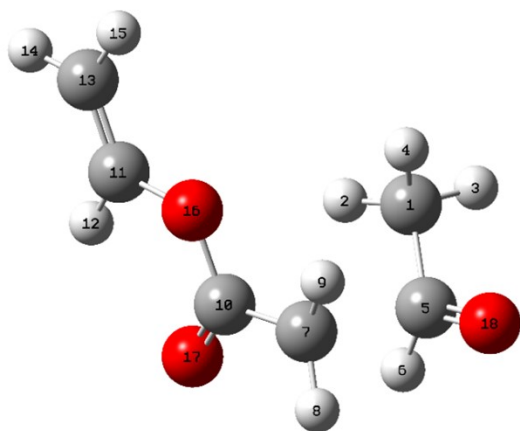

TS35

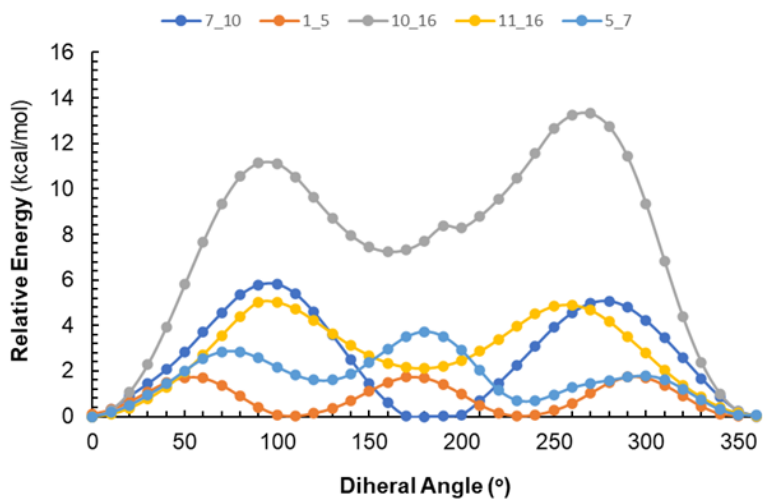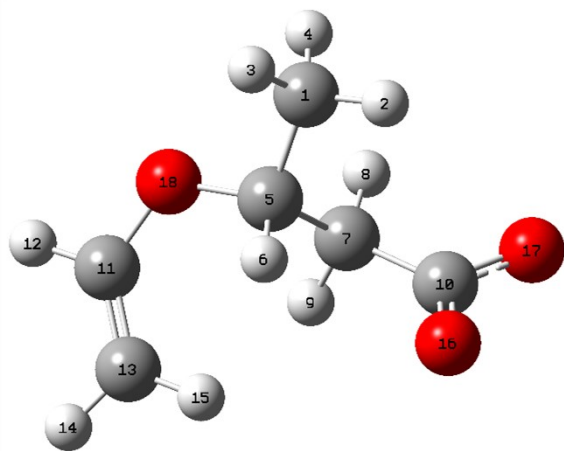

P21

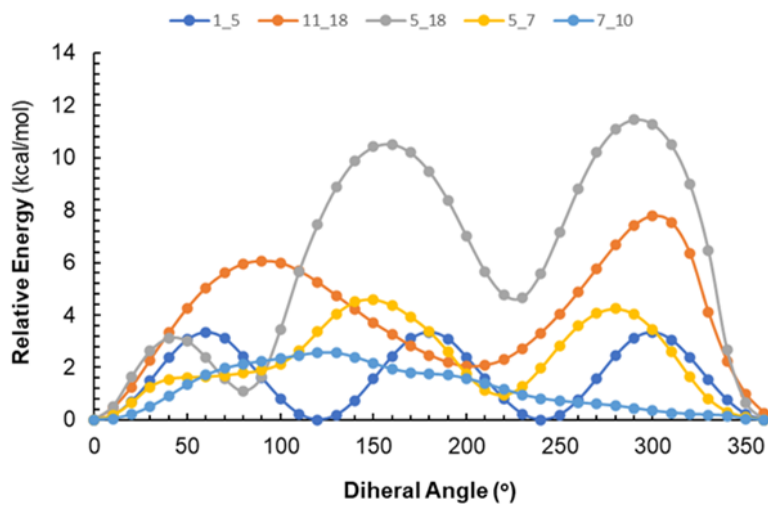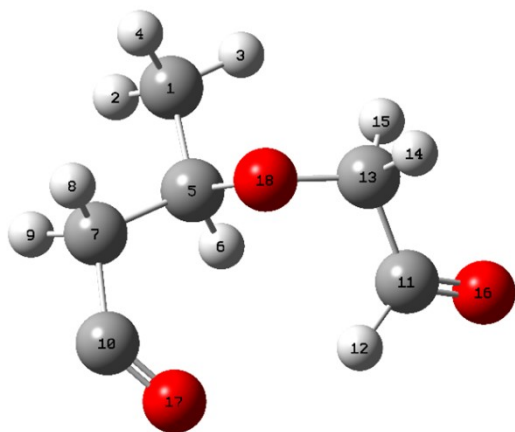

P22

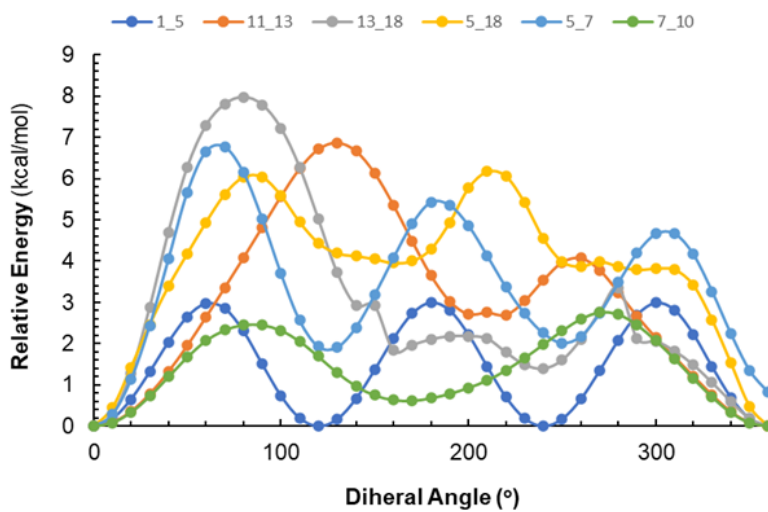

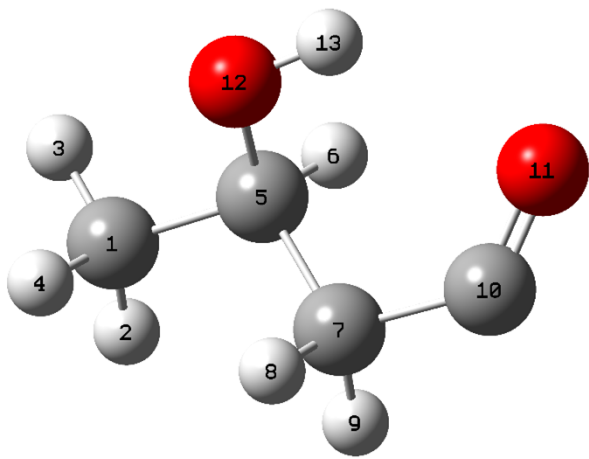

P23

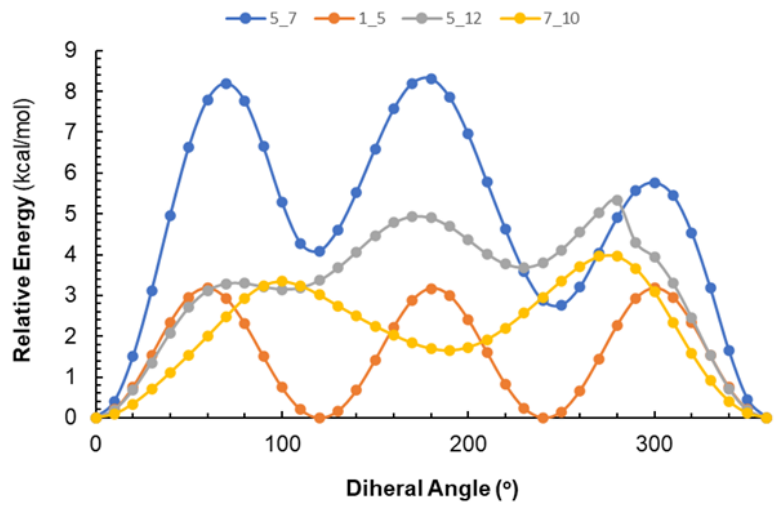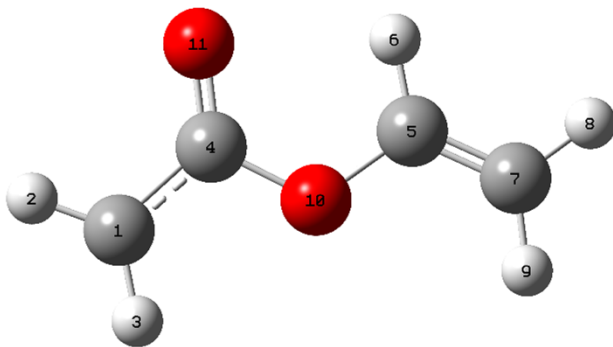

P25

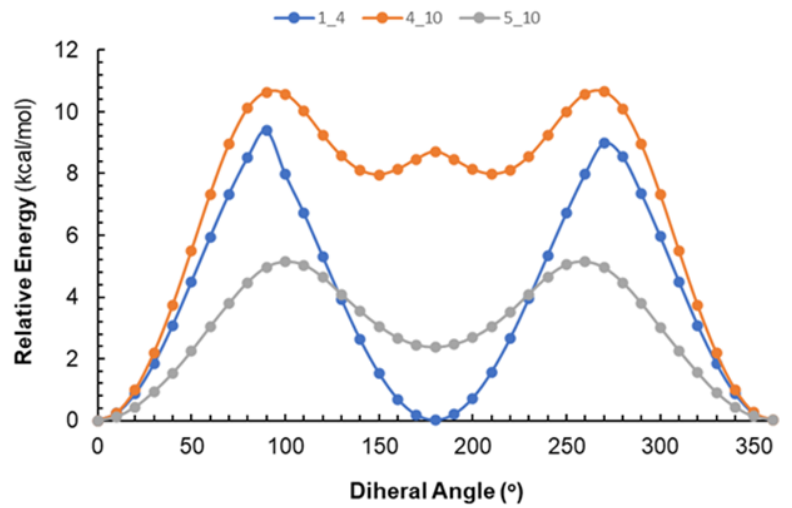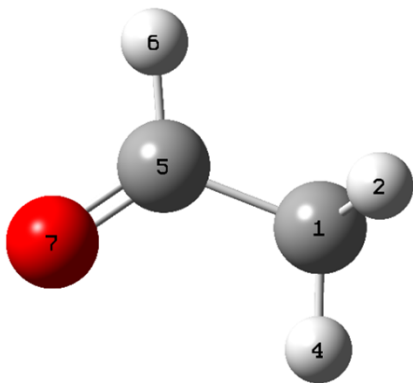

CH<sub>3</sub>CHO

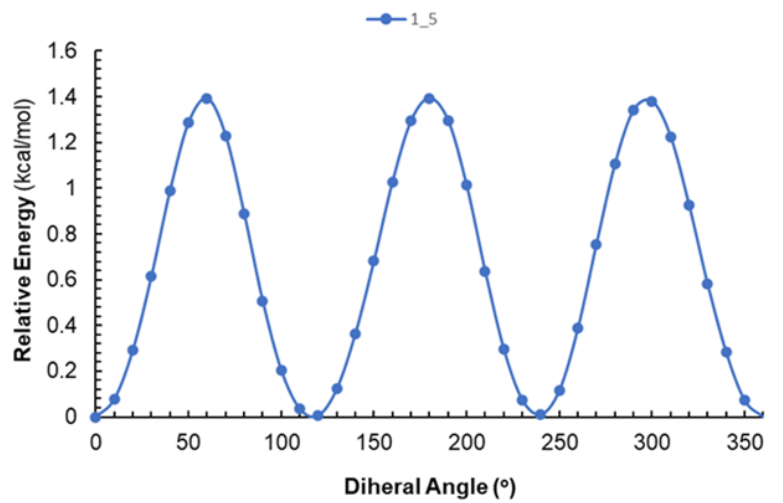

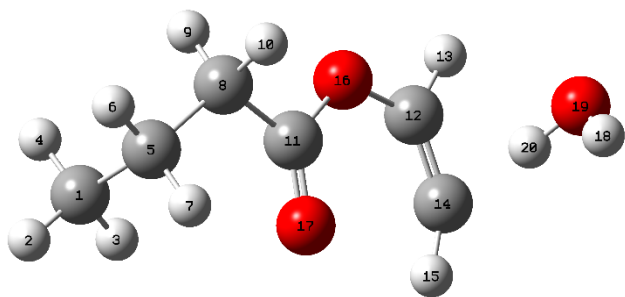

PC1

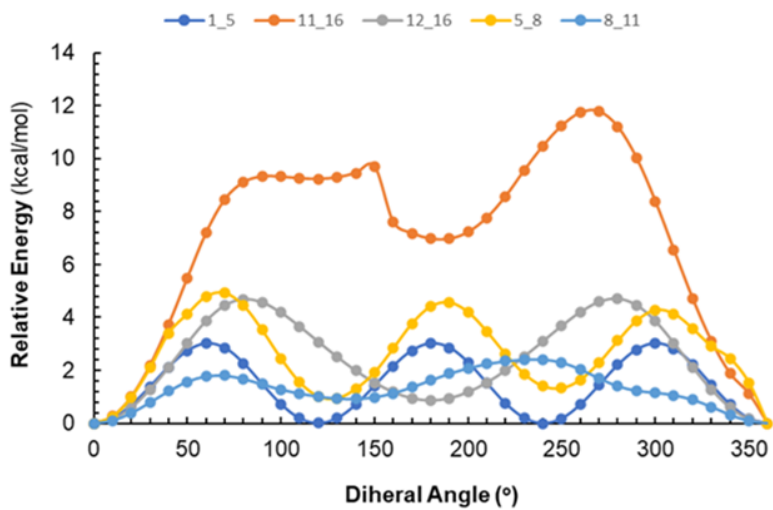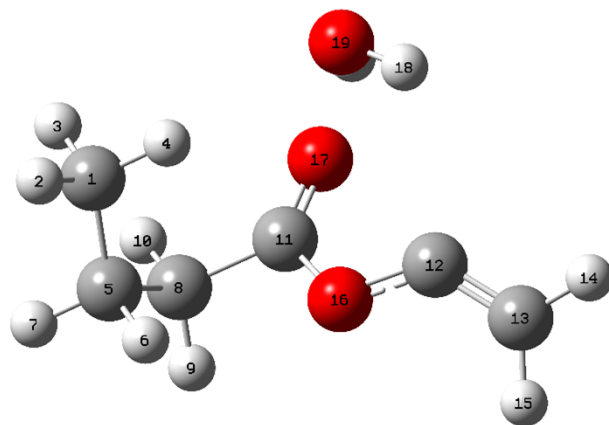

PC2

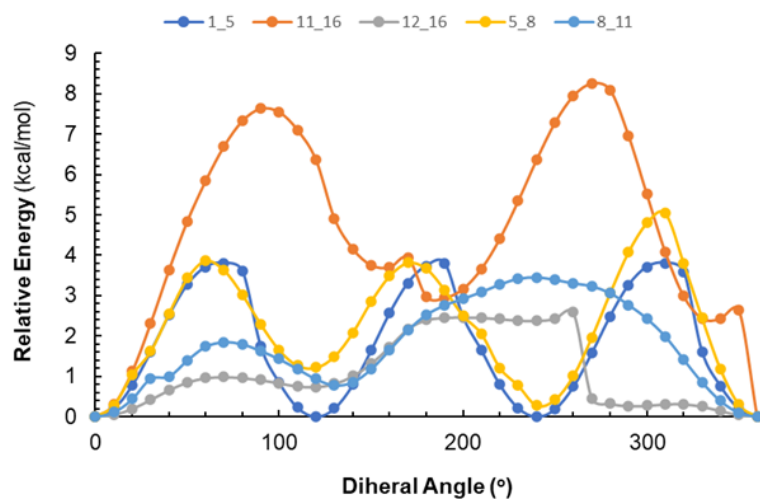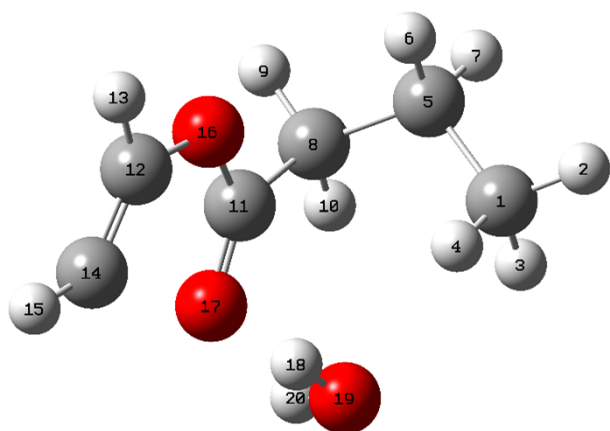

PC3

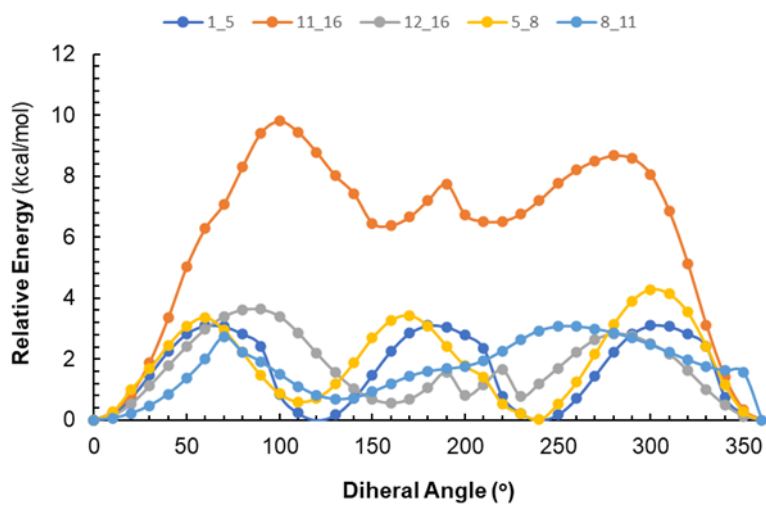

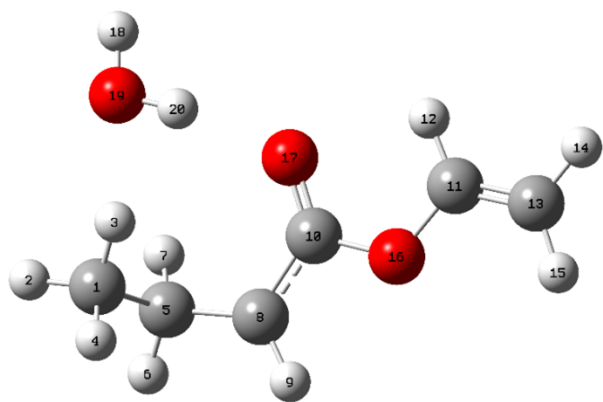

PC4

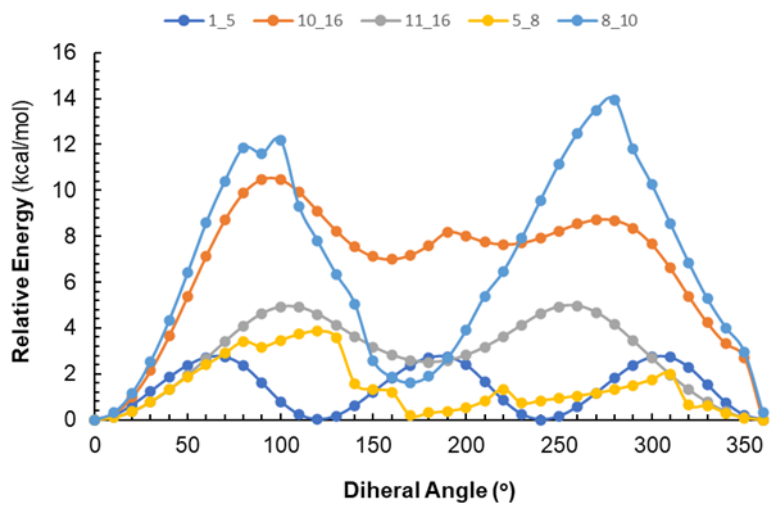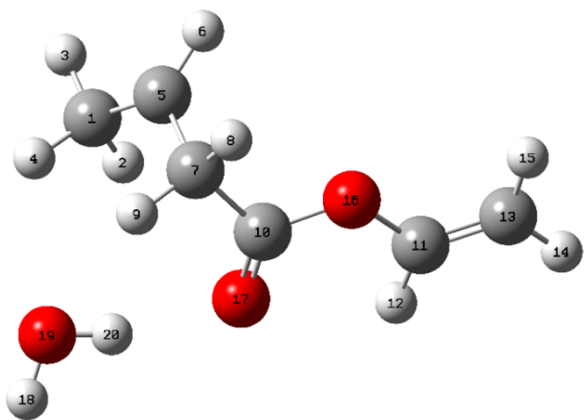

PC5

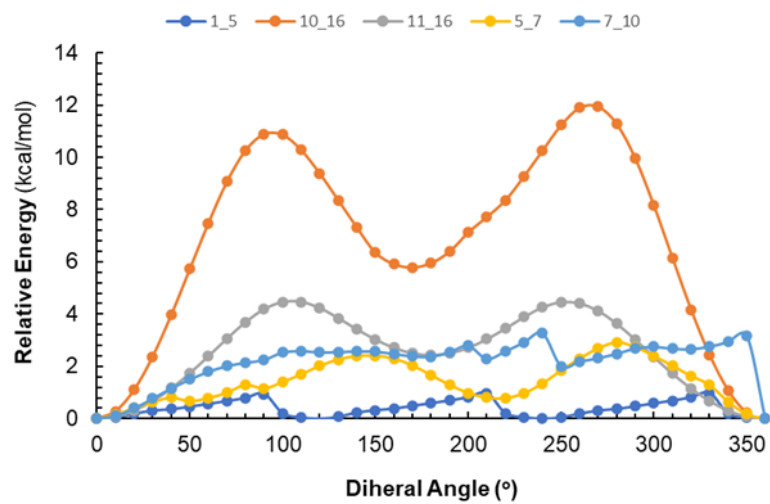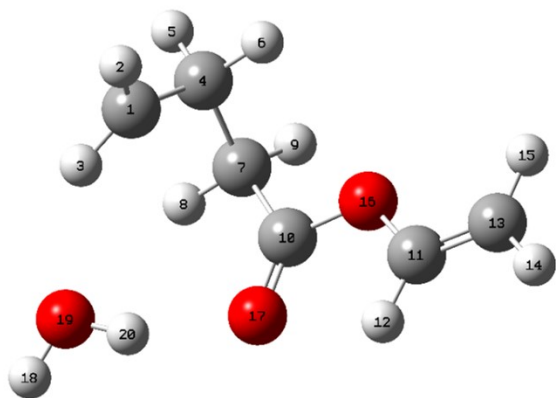

PC6

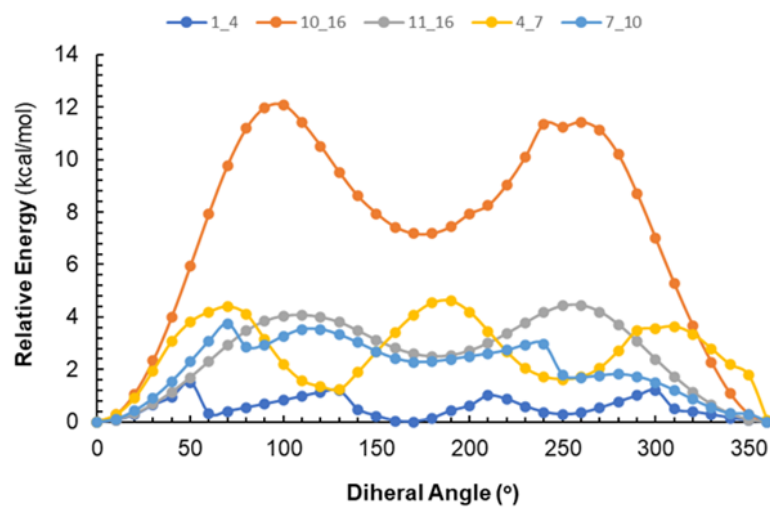

Figure S6: Hindrance potentials for the species involved in the VB + OH/O<sub>2</sub>/NO reaction, obtained at M06-2X/cc-pVDZ level.
